# Supplementary material for: Field observations of Volatile Organic Compound (VOC) exchange in red oaks
Source: Copernicus journal article supplement (doi:10.5194/acp-2016-901), 2016-10-18
Supplement: Supplementary file [file acp-2016-901-AC1-supplement.pdf]

Dear Editor,

We thank the two reviewers for their thoughtful and detailed comments on our manuscript. Please find below our response to the comments raised by the reviewers. We hope to have satisfactorily responded to all reviewer suggestions and comments, which have substantially improved the manuscript. Changes in the revised manuscript were made using the track-mode tool and are visible. Author comments below are in bold.

#### **REVIEWER #1:**

General comments:

Cappellin and coauthors present 42 days of VOC measurements above a mixed red oak forest in central Massachusetts. The measurements consisted of 22 days of concentration profile, followed by 20 days of branch chamber measurements, where the last day was used for fumigation. In the results 6 different VOCs and 2 VOC groups are presented. The manuscript meets the scope of the journal and can be accepted for publication after addressing following comments:

**We thank the reviewer for these comments.**

Specific comments:

Did the authors present all VOCs that showed exchange? If not, how many were measured and what was the selection criteria?

**Although VOCs are detected at many m/z ratios, we focused on VOCs that showed significant ecosystem-level fluxes in previous measurements at Harvard Forest (McKinney et al., 2011).**

**In addition, we report benzaldehyde since, to the best of our knowledge, deposition of this compound has never been reported in forest so far.**

**At page 11, lines 5-7, the following sentence has been added:**

**“The reported compounds were selected based on canopy-scale flux measurements previously performed at a nearby site (McKinney et al., 2011) with the addition of benzaldehyde.”**

P6 L14: as it is a mixed forest: what are the major tree species? This information can be helpful for the interpretation of the concentration profiles and the flux upscaling.

**The major tree species present in the mixed forest can be found in Urbanski et al. (2007).**

**At page 6, lines 19-23, the following sentence has been added:**

**“A survey of the tree species present at EMS is reported in Urbanski et al. (2007): The mixed forest stand encompasses red oak (36 % of biomass), red maple (22 %), hemlock (13 %), red pine (8 %), birch (5 %), white pine (6 %), cherry (3 %), spruce (2 %) and beech (0.8 %). The species distribution at the walk-up tower site is similar but not identical.”**

P7 L21 & P9 L9: randomly cycle between the inlets -> what are the benefits of randomly cycling? Isn't it disadvantageous, that e.g. the highest inlet could be measured for 1 h in a row, while a lower inlet would be measured with a 1:40 h gap? Please rephrase so it is more clear that random cycling means that all four heights were sampled in a random order during 1 h of measurements (and not, that random means that e.g. one height could be measured multiple times during 1 h).

**We thank the reviewer for noting this point. We rephrased the two sentences in order to clarify that random cycling means that all four heights were sampled in a random order during 1 h of measurements.**

**At page 8, lines 1-3, the sentence now reads:**

**“The valve system was set to cycle between the inlets every 10 min (30 min in the case of tower top inlet) so that all inlets were measured in random order every 60 min.”**

**At page 9, lines 12-15, the sentence now reads:**

**“Each branch enclosure was sampled for 10 min, followed by 10 minutes from the empty enclosure. The valve system was set to cycle among the branch enclosures so that all of them were measured in random order”**

P9 L24 – P10 L5: The fumigation experiments are not well described here, please specify:

- in which mode was the instrument used (according to P15 L20 it was  $\text{NO}^+$ , but it is not clear if also  $\text{H}_3\text{O}^+$  was used),
- the used concentrations (in the gas cylinders)
- the target VOCs
- what was the final concentration or dilution which was delivered to the branch enclosure?
- how long did it take (in average) until the signal was stable?

This information is important for the reader.

**We added the suggested information to the experimental description (page 10, lines 6-19):**

**“On September 2 ancillary fumigation experiments were carried out. Gas cylinders containing known amounts of the target VOCs (Scott Specialty Gases, Inc.) were diluted with zero air using mass flow controllers (MKS Instruments) and delivered to the branch enclosures. Tested VOCs included isoprene (80 ppm  $\pm$  5% in the gas cylinder), MVK (1 ppm  $\pm$  5%), MACR (1 ppm  $\pm$  5%), acetone (1 ppm  $\pm$  5%), and methanol (1 ppm  $\pm$  5%). For each VOC different concentrations in the range 0-70 ppbv (0-700 for isoprene) were delivered to the branch enclosures. Flow rates were set as previously described. For each concentration step, the enclosures, including the empty one, were measured in random order and the signal was allowed to stabilize (typically for tens of minutes) before a measurement was made. The PTR/SRI-ToF-MS was operated in  $\text{NO}^+$  mode. VOC exchange rates were computed as described above.”**

P10 L7: 2.4 PTR/SRI-ToF-MS operation and data analysis: Please state typical primary ion counts for  $\text{H}_3\text{O}^+$  and  $\text{NO}^+$  mode and add the percentage of the first water cluster (in the  $\text{H}_3\text{O}^+$  mode). Typical primary ion counts were  $1.1 \cdot 10^6$  cps for  $\text{H}_3\text{O}^+$  mode and  $1.2 \cdot 10^6$  cps for  $\text{NO}^+$  mode. The percentage of first water cluster in the  $\text{H}_3\text{O}^+$  mode was ca. 19%.

**In the supplement, at page 1, lines 10-11, the following sentence was added:**

**“The primary ion signal was  $1.1 \cdot 10^6$  cps and the percentage of first water clusters was about 19%.”**

**In the supplement, at page 1, lines 13-14, the following sentence was added:**

**“The primary ion signal was  $1.2 \cdot 10^6$  cps”.**

P13 L9-13: What were the uncertainties of the calibration gas? What were typical concentrations/dilution used for calibrations and could the authors state the used sensitivities (measured and calculated)?

**We added the required specifications.**

**In the supplement, at page 3, lines 23-25, the following sentences were added:**

**“The uncertainties of the calibration gases were  $\pm$  5%. Typical concentrations used for instrumental calibration were in the range 1-70 ppbv. For isoprene concentrations used for instrumental calibration were in the range 1 ppbv - 1 ppmv.”**

**In the supplement, at page 4, lines 7-15, the following sentences were added:**

**“In  $\text{H}_3\text{O}^+$  mode the instrumental sensitivities were the following: 16.4 ncps/ppbv for isoprene, 27.1 ncps/ppbv for methacrolein, 28.7 ncps/ppbv for MVK, 28.0 ncps/ppbv for MEK, 40.0 ncps/ppbv for benzaldehyde, 21.4 ncps/ppbv for acetaldehyde, 25.8 ncps/ppbv for acetone, 13.2 ncps/ppbv for methanol, 28.5 ncps/ppbv for monoterpenes; where ncps are counts per second normalized to a primary ion signal of  $10^6$  cps. In  $\text{NO}^+$  mode the instrumental**

**sensitivities were the following: 17.6 ncps/ppbv for isoprene, 16.4 ncps/ppbv for methacrolein, 21.0 ncps/ppbv for MVK, 26.5 ncps/ppbv for MEK, 43.7 ncps/ppbv for benzaldehyde, 13.3 ncps/ppbv for acetone, 29.9 ncps/ppbv for monoterpenes.”**

P13 L18: Please reformat this sentence, as the reader could get the impression that the uncertainty of the calculated sensitivity is 10%. While I guess the author means that the calculated sensitivity is within 10% of the experimental estimated sensitivity (which has a 15% uncertainty). Otherwise the reader could believe that calculating a sensitivity is actually better (less uncertainty) than getting it via calibration. Please also state that the cited study was measured in a laboratory with known compounds and known fragmentation patterns. Whereas here the chemical structure is not known (e.g. monoterpenes) and fragmentation patterns vary. Additionally fragments cannot be assigned to one compound, as many compounds fragment to the same masses (e.g. C<sub>3</sub>H<sub>5</sub><sup>+</sup>; C<sub>2</sub>H<sub>3</sub>O<sup>+</sup>; C<sub>6</sub>H<sub>9</sub><sup>+</sup>). Please remove the “Mueller et al., 2014” reference, as it just very briefly names the theoretical approach, but doesn't compare calculated with theoretical sensitivities.

**We thank the reviewer for this suggestion. We changed the text accordingly.**

**In the supplement, at page 4, lines 1-7, we replaced this sentence**

**“This method was shown to estimate concentrations within a 10% uncertainty, under certain instrumental conditions (Cappellin et al., 2012)”, with the following sentences:**

**“Instrument sensitivities calculated with such method have been shown to agree with sensitivities determined experimentally within 10%, under certain instrumental conditions (Cappellin et al., 2012). In particular this is true when the identity of the compound and the fragmentation pattern are known. In some cases the chemical structure or fragmentation pattern is not known (e.g. monoterpenes) thus the expected uncertainty increases. Moreover, some fragments can arise from multiple compounds (e.g. C<sub>3</sub>H<sub>5</sub><sup>+</sup>).”**

P15 L19: It is true that 2-butanol is measured in the H<sub>3</sub>O<sup>+</sup> mode at M 57.070 (C<sub>4</sub>H<sub>9</sub><sup>+</sup>). But there could be a potential influence from protonated butene, which is known to be emitted from trees (e.g. Hakola et al., 1998). Was this considered (and dismissed by comparison with the NO<sup>+</sup> measurements)? Were there any interferences from the water cluster (H<sub>7</sub>O<sub>3</sub><sup>+</sup>) when measuring 3-buten-2-ol in the H<sub>3</sub>O<sup>+</sup> mode?

**Previous studies on red oak emissions (Helmig et al., 1999) have not reported butene (to the best of our knowledge), therefore we ruled out this potential interference. The paper mentioned by the reviewer did report butene emission but from tree species other than red oaks, namely from tea-leafed willow, silver birch and European aspen. The spectral peak corresponding to the water cluster and the one corresponding to the signal of buten-2-ol partially overlap. The peak deconvolution algorithm was able to separate them although some influence cannot be ruled out completely. There is no significant correlation between the two signals (p>0.05), thus suggesting that the influence is not strong.**

P17 L13: Have there been more studies which showed ecosystem MVK + MACR emissions from oak forests since 2005?

**We thank the reviewer for noting it. There are actually more recent studies about positive ecosystem-scale fluxes of MVK and MACR in oak forests (Kalogridis et al., 2014; Schallhart et al., 2016). We added such references at page 12, line 19.**

Technical corrections:

P3 L3 & following: order of references: chronological; here: (Guenther et al., 1995; Benkovitz et al., 2004). (The references at the end of the manuscript are sorted alphabetically).

**We chose to order the in-text citations alphabetically and we propose to keep this choice. Citing from the ACP guidelines: “In terms of in-text citations, the order can be based on**

relevance, as well as chronological or alphabetical listing, depending on the author's preference.”

P3 L8: forming -> to the formation of

**This point has been corrected.**

P4 L21: quite toxic -> toxic

**This point has been corrected.**

P7 L3: NO<sub>y</sub> -> NO<sub>y</sub> (y subscript)

**This point has been corrected.**

P7 L14 & following: inch -> metric units (SI units), please change all imperial units to SI units.

Please have a look at: [http://www.atmospheric-chemistry-and-physics.net/for\\_authors/manuscript\\_preparation.html](http://www.atmospheric-chemistry-and-physics.net/for_authors/manuscript_preparation.html) at the “Mathematical notation and terminology”

**This point has been corrected.**

P7 L18 & following: slm -> L min<sup>-1</sup>

**This point has been corrected.**

P8 L3-4: remove bold format

**This point has been corrected.**

P8 L8: (See Section 2.4 for details) -> (see Sect. 2.4)

**This point has been corrected.**

P8 L9: Palladium -> palladium

**This point has been corrected.**

P8 L18: [version 1.47, (Schneider et al., 2012)] -> (version 1.47; Schneider et al., 2012)

**This point has been corrected.**

P8 L18: A fourth bag not containing a branch was -> A fourth, empty enclosure was

**This point has been corrected.**

P8 L24: Bios DryCal Flow Calibrators -> please specify the used type

**This point has been corrected.**

**At page 9, line 5, we specified that we used “Bios Defender 520-H and 520-L”.**

P9 L4: to achieve residence times of 38s -> please specify that the residence time belongs to the enclosure

**This point has been corrected.**

P9 L17: in the empty bag -> empty enclosure

**This point has been corrected.**

P9 L21: (See Section 2.4 for details) -> (see Sect. 2.4)

**This point has been corrected.**

P10 L1: flow controllers (MKS instruments) -> please do not state just a company, always add the used type of instrument

**This point has been corrected.**

**At page 10, line 9, we specified that we used “Mass-Flo Controller, MKS instruments”.**

P10 L20-21: ...per channel .....350,000 channels -> “bin” is a more common used word (e.g. Graus et al., 2010) as channels could be confused with the channels in the MCP; -> 350 000 in the remaining manuscript not thousand-separator was used (see Table 1 & 2; Fig 01)

**This point has been corrected.**

P11 L5 & following: (5a), (5b),... please start with 1 (not 5) and proceed from there. For chemical reactions (R1), (R2),.. is used.

**This point has been corrected.**

P11 L24 & following: (channel 5b) -> (Eq. R2)

**This point has been corrected.**

P16 L4 & following: Figure 1 -> Fig. 1 (Figure X is just used when starting a sentence, otherwise Fig. X is used)

**This point has been corrected.**

P28 L23-24: [see e.g. (Omasa et al., 2002)] -> (e.g. Omasa et al.,2002)

**This point has been corrected.**

P32 L11: stages, In -> stages. In

**This point has been corrected.**

Table 1 & 2: [nmol/m<sup>2</sup>/s] -> [nmol m<sup>-2</sup> s<sup>-1</sup>]

**This point has been corrected.**

please change the average daytime emission of ISOP to  $2 \pm 1 \times 10^4$  (same for average 24h emission) if there was no isoprene flux during night, please change  $0.0 \pm 0.0 \times 10^5$  to 0; if there was a flux then please give proper values (same goes for maximum deposition rate)

**This point has been corrected.**

Table 3: [mol / (m<sup>3</sup>·Pa)] -> [mol m<sup>-3</sup> Pa<sup>-1</sup>]

**This point has been corrected.**

Fig03 & Fig07: please use same notation for axis label units []

**The units are different because in one case flux and the other case concentrations are represented.**

Fig 03,04,06: state the fit parameters in the figure (legend)

**The fit parameters have been added in the legends of Fig. 03, 04 and 06.**

References:

Graus, M., Müller, M., and Hansel, A.: High resolution PTR-TOF: quantification and formula confirmation of VOC in real time, *J. Am. Soc. Mass Spectr.*, 21, 1037–1044, 2010.

Hakola, H., Rinne, J. and Laurila, T.: The hydrocarbon emission rates of tea-leafed willow (*Salix phylicifolia*), silver birch (*Betula pendula*) and European aspen (*Populus tremula*), *Atmos. Environ.*, 32(10), 1825–1833, doi:10.1016/S1352-2310(97)00482-2, 1998.

Müller, M., Mikoviny, T. and Wisthaler, A.: Detector aging induced mass discrimination and non-linearity effects in PTRToF-MS, *Int. J. Mass Spectrom.*, 365–366, 93–97, doi:10.1016/j.ijms.2013.12.008, 2014.

## **REVIEWER #2:**

The manuscript of Cappellin et al. reports fluxes of volatile organic compounds (VOC) from branch enclosure and canopy profile measurements in a mixed forest. Moreover, the author performed branch-level fumigation experiments by employing some selected Oxygenated-VOCs to get new insights into the sources and sinks of those VOCs. The manuscript is generally well written and fits the scope of the journal. However, I suggest the author to address some major and minor issues (listed below) to get the manuscript ready for publication.

**We thank the reviewer for these comments.**

## **MAJOR ISSUES:**

- The author collected data over a period spanning 2 weeks (from 14th of August to 1st September) which can be defined as a ‘short-term’ period of time. Therefore, the author should take into account that emission/deposition rates of (O)VOC and their dynamics presented in this manuscript can change over a longer period of time (i.e. months).

**The reviewer is right in pointing out that fluxes can change over time. However, a long-term survey of flux dynamics is beyond the scope of the present paper, which concentrates on providing a “snapshot” of a particular period, as is commonly done in many field campaigns, and comparing branch-level fluxes with canopy-level fluxes measured in similar periods but different years. The reported data span from 14<sup>th</sup> of August to 1<sup>st</sup> September for branch level fluxes and from 17<sup>th</sup> of July to 8<sup>th</sup> of August for vertical profiles (42 days overall).**

**At page 10, lines 1-4, the following sentence has been added:**

**“The present study reports measurements for a particular period and compares them with canopy-level fluxes measured in similar periods but different years. A long-term survey of flux dynamics is beyond the scope of the present paper.”**

- Despite the concentration of several VOCs have been measured simultaneously by PTR-TOF-MS, the author reported in the manuscript only “the most important OVOC and volatile isoprenoids” (as written in line 1, page 16). The author should clearly define ‘how’ those oVOC and the isoprenoids have been selected/filtered from the multitude of protonated ions related to VOC (and/or fragment of VOC.) recorded by PTR-TOF-MS.

**The first reviewer also asked for this clarification. Please see the answer above.**

- I remind the author that ‘concentrations’ of VOC shown in Figure 1, may represent a larger area possibly including other sources/sinks than the mixed forest investigated by the author. Indeed only through a ‘footprint analysis’, a model that considers the concentration distribution of VOC with respect to wind speed and the turbulent air conditions occurring at the site, it can be sorted out the representativeness of the measured concentration on the surface area (Horst and Weil 1992, 1994; see also Schmid 1994 for details).

**We agree with the reviewer that the concentrations shown in Figure 1 represent a larger area than the mixed forest in the immediate vicinity of the sample site. We carefully checked the manuscript and do not think it implies otherwise.**

**Footprint analysis is commonly used for canopy-scale surface-atmosphere fluxes measured using methods such as eddy covariance. In the case of flux measurements, a footprint is used to determine the surface area contributing to the vertical flux of scalars (such as species concentrations) at a specific height above the forest canopy. Footprint analysis is not used in the interpretation of species concentrations, because, even for short-lived gases, the upwind area contributing to the concentration at a particular location is likely to be quite large (10’s to 100’s of kilometers for a species with an atmospheric lifetime of a few hours.) For longer-lived species (days to weeks), the “footprint” can be thousands of km. Furthermore, as the foregoing suggests, the concentration “footprint” will vary with the chemical lifetime of the species of interest. We note that the citations given by the reviewer are to the use of footprint analysis for flux measurements, e.g., Horst and Weil, 1992: “Footprint estimation for scalar flux measurements in the atmospheric surface layer.”**

**In the current case, we are not reporting canopy-scale fluxes, but rather concentrations, so a footprint calculation would not be needed.**

- The author discussed the results, i.e. of methanol fluxes (lines 9-24, page 30) by comparing VOC fluxes calculated in this manuscript from measurements collected at branch-level (and then scaled-up at canopy-level after considering the average LAI and inhomogeneity of the canopy; as written in lines 20-24, page 16 and lines 1-4, page 17), with results found in the literature where VOC fluxes have been measured at canopy level by eddy covariance technique. The author should discuss and make the point on how the different approach in calculating the VOC fluxes may have produced different results (i.e. eddy covariance flux measurements provide emission/deposition fluxes from complex sources/sinks also including the soil, while branch measurements provide indications of VOC emissions mainly from leaves as the only source/sink).

**We thank the reviewer for this suggestion. We added a discussion of the different approaches. At page 23, lines 8-14, the following sentence has been added:**

**“The scaling of measured branch-level fluxes to canopy-level assumes that the only contribution to the flux is from tree branches, while other possible sources and sinks, such as**

**the soil or chemistry within the canopy, are neglected. This should be kept in mind when comparing the predicted canopy-scale fluxes to the measured eddy covariance fluxes. Some insight into the possible soil contribution to fluxes is provided by the concentration vertical profile data discussed below.”**

- I am wondering whether the author can provide additional data on both the CO<sub>2</sub> and water vapor exchange from branch enclosure measurements. Indeed, the measurements of CO<sub>2</sub> assimilation rates would give information on the physiological performances of the leaves enclosed in the branch chamber; this would be particularly important to evaluate any damage eventually occurring to primary leaves metabolism following MVK absorption (in correlation with detoxification and thus MEK emission). In addition, measurements of water vapor exchange (even though at branch level) would provide basic information useful to both estimate the extent of stomata conductance and to partition the stomata and non-stomatal contribution to the uptake of (O)VOC (Fares et al. 2012) that has been mentioned several times throughout the manuscript.

**We did not deploy specific detectors for CO<sub>2</sub> and water vapor. The acquired PTR-ToF-MS data contain signals related to them, but there are several caveats. The reaction between the primary ion and CO<sub>2</sub> does not proceed at collision rate and the water vapor signal is influenced by the primary ion signals. Since the signals for CO<sub>2</sub> and water vapor were not explicitly calibrated for during the campaign, we prefer to avoid adding data of not assured quality. We agree with the reviewer that they would provide additional insights, but the findings of the paper do not rely on such data. Additional questions about the relationship between CO<sub>2</sub>, H<sub>2</sub>O and VOC exchange are beyond the scope of the present paper, but may be addressed in future studies.**

- Since the ‘compensation point’ may vary on the basis of both physiological and physicochemical factors (as reviewed by Niinemets et al. 2014), when discussing this issue it would be better to indicate, at least, the environmental conditions under which this point has been determined.

**We indicated the environmental conditions in the revised manuscript.**

**At page 10, line 17-19, the following sentence has been added:**

**“During the ancillary experiments daytime temperature and PAR were in the ranges 27.1-28.2 °C and 894-1584 mmol m<sup>-2</sup> s<sup>-1</sup>, respectively; while nighttime temperature was in the range 20.7-22.2 °C.”**

- Material and Methods section needs to be re-formatted and dramatically shorten it (now it is almost 10 pages long!). I suggest the author to either delete or move to ‘Supplementary Information’ most of the description of PTR-TOF-MS technical details (which is now 6 pages long) and simply mention citations of the many previous scientific works where PTR-TOF-MS has been already described. In fact, subsections 2.4.1 and 2.4.2 belong more to a textbook than to a scientific paper, while much of the ‘Spectral analysis’ subsection could be summarized in a table (i.e. by comparing VOC analysis by PTR-TOF-MS set in H<sub>3</sub>O<sup>+</sup> and NO<sup>+</sup> mode). Moreover, if not commercial, a schematic and/or a picture of the canopy-top branch enclosure employed for the measurements would be very much informative.

**We agree with the reviewers that most of the description of PTR-TOF-MS technical details is more appropriate for the “Supplement”. We therefore moved to the “Supplement” the subsection 2.4.1, 2.4.2 and 2.4.3 (now section S.4). The remaining section 2.4 has been shortened, referring the reader to the “Supplementary Information” for a detailed description. Section 2.4 now reads (page 10, lines 21-23, and page 11, line 1):**

**“VOC measurements were performed by a PTR/SRI-ToF-MS 8000 (Ionicon Analytik GmbH, Innsbruck Austria) equipped with a switchable reagent ion system (Jordan et al., 2009), allowing either NO<sup>+</sup> or H<sub>3</sub>O<sup>+</sup> primary ion chemistry. Details of the instrument operation are reported in the Supplementary Material.”**

**We also provided a picture of the branch enclosure system (Fig. S.1) and a table (Table S.1) summarizing the “Spectral analysis” subsections.**

MINOR ISSUES:

- Consistency I required throughout the manuscript! Please make use of either the term BVOC or VOC.

**This point has been corrected. Only the term “VOC” is used in the revised manuscript.**

- Is there any particular reason why fluxes are always expressed in “nmol m<sup>-2</sup> hour<sup>-1</sup>”, instead of “nmol m<sup>-2</sup> second<sup>-1</sup>”? (in which all the measurements unit are indicated according to the International System of Units)

**We propose to keep “nmol m<sup>-2</sup> hour<sup>-1</sup>” as it is commonly used and it is a convenient unit given the numbers involved.**

- Lines 12-13, page 1: I suggest to replace ‘atmospheric reactor’ with ‘atmosphere’.

**This point has been corrected.**

- Line 14, page 6: the author should describe the plant species composition of the mixed forest that has been investigated; this can offer information to improve the discussion of sources/sinks of (O)VOC emission/deposition.

**The first reviewer had a similar suggestion, please see the above answer.**

- Line 21, page 6: it is written ‘Influence’, without specifying ‘of what’?

**Influences of anthropogenic VOC. At page 7, line 3, the sentence now reads: “Anthropogenic VOCs come from (...)”.**

- Lines 3-4, page 8: I wonder why the fonts of this sentence are in ‘bold’ . . .

**Bold formatting has been removed.**

- Lines 14-15, page 16: This is not clear, and I suggest the author to rephrase it.

**The sentence has been rephrased as follows (page 11, lines 16-19):**

**“Figure 2 shows daytime and nighttime isoprene concentrations at different heights within and above the canopy. This vertical profile is consistent with an isoprene source within the canopy during the day, while it suggests that there is no isoprene emission nor deposition at night.”**

- Lines 13-14, page 17: I remind the author that also Brillì et al. (2016) showed MVK+MAC emission fluxes at canopy-level from a poplar plantation.

**The suggested reference has been added (page 12, line 18).**

- Line 4, page 18: the author should quickly explain ‘why’ ‘the actual presence of emissions could not be proved.

**The sentence has been modified as follows: “the actual presence of emissions could not be proved due to interferences from high levels of isoprene, as explained above.”**

- Lines 4-5, page 20: I suggest to remove both the words ‘first’ and to replace the last word with ‘before’.

**The sentence has been rephrased.**

**Page 14, lines 12-13, the sentence now reads: “(reduction of the carbonyl moiety versus reduction of the alkene moiety)”.**

- Lines 14-17, page 20: I remind the author that also Brillì et al. (2016) found emission and deposition fluxes of MEK through eddy covariance measurements at canopy level.

**The following sentence has been added (page 16, lines 2-3):**

**“Brillì et al. (2016) reported positive and negative MEK fluxes at canopy level over a poplar plantation.”**



- Lines 19-20, page 22: the author should specify which kind of ‘correlation’ (i.e. linear?)

**We specified “linear correlation” (page 18, line 6)**

- Lines 1-3, page 23: I remind the author that emission of alcohols (i.e. belonging to the mixture of Green Leaf Volatiles) does not depend to the plant species, but to the occurrence of specific situation (i.e. the presence of herbivores inducing mechanical damage to leaves).

**At page 18, line 13, we removed “, however, GC-MS analysis of red oak volatiles did not report any potentially interfering alcohols (Helmig et al., 1999)”**

- Line 16-17, page 24: the author meant ‘benzaldehyde concentration’, in air ?

**Correct, we meant benzaldehyde concentration in the branch enclosure air.**

**At page 20, line 5, “in the branch enclosures” was added after “benzaldehyde concentration”.**

- Lines 5-6, page 27: These citations are missing in the reference list.

**The citations have been added to the list.**

- Lines 7-8, page 28: I am wondering if the Model of Emissions of Gases and Aerosols from Nature has been never applied to simulate acetone emissions.

**Yes, MEGAN has been applied to simulate acetone emissions (e.g. Messina et al, Atmos. Chem. Phys., 2016). We prefer not to mention it, as we were referring to the fact that the metabolic mechanisms leading to acetone release have not yet been proved and therefore, at present, no process-based model is capable of reliably describing biogenic acetone emissions.**

- Line 18, page 29: I remind the author that also Hüve et al. 2007 investigated the control of ethanol release by leaf expansion and stomata.

**We thank the reviewer for this suggestion. The suggested reference has been added (page 25, lines 10 and 11).**

We hope that the revised manuscript will be acceptable for publication in ACP. We thank you for your attention, and look forward to hearing from you.

Sincerely,

Luca Cappellin

## Field observations of Volatile Organic Compound (VOC) exchange in red oaks

Luca Cappellin<sup>1,2</sup>, Alberto Algarra Alarcon<sup>2,4</sup>, Irina Herdlinger-Blatt<sup>3</sup>, [Juaquin Sanchez<sup>1</sup>](#), Franco Biasioli<sup>2</sup>, Scot Martin<sup>1</sup>, Francesco Loreto<sup>5</sup>, Karena McKinney<sup>1</sup>

<sup>1</sup>School of Engineering and Applied Sciences, Harvard University, Cambridge, Massachusetts, USA

<sup>2</sup>Research and Innovation Centre, Fondazione Edmund Mach, S. Michele a/A 38010, Italy

<sup>3</sup>Institute of Ion Physics and Applied Physics, University of Innsbruck, Innsbruck 6020, Austria

<sup>4</sup>Institute of Ecology, University of Innsbruck, Innsbruck 6020, Austria

<sup>5</sup>National Research Council, Department of Biology, Agriculture and Food Science (DISBA), Rome 7-00185, Italy

*Correspondence to:* Luca Cappellin (luca.cappellin@fmach.it) and Karena McKinney (kamckinney@seas.harvard.edu)

### Abstract.

Volatile organic compounds (VOCs) emitted by forests strongly affect the chemical composition of the atmosphere. While the emission of isoprenoids has been largely characterized, forests also exchange many oxygenated VOCs (oVOCs), including methanol, acetone, methyl ethyl ketone (MEK) and acetaldehyde, which are less well understood. We monitored total branch-level exchange of VOCs of a strong isoprene emitter (*Quercus rubra* L.) in a mixed forest in New England, where canopy-level fluxes of VOCs had been previously measured. We report daily exchange of several oVOCs and investigated unknown sources and sinks, finding several novel insights. In particular, we found that emission of MEK is linked to uptake of methyl vinyl ketone (MVK), a product of isoprene oxidation. The link was confirmed by corollary experiments proving *in vivo* detoxification of MVK, which is harmful to plants. Comparison of MEK, MVK and isoprene fluxes provided an indirect indication of within-plant isoprene oxidation.

Furthermore, besides confirming bidirectional exchange of acetaldehyde, we also report for the first time direct evidence of benzaldehyde bidirectional exchange in forest plants. Net emission or deposition of benzaldehyde was found in different periods of measurements, indicating an unknown foliar sink that may influence atmospheric concentrations. Other VOCs, including methanol, acetone and monoterpenes, showed clear daily emission trends, but no deposition. Measured VOC emission and deposition rates were generally consistent with their ecosystem-scale flux measurements at a nearby site.

10

15 **Keywords**

Volatile organic compounds, plant emission, plant uptake, atmosphere-biosphere interactions, red oak.

## 1 Introduction

Global budgets indicate that biogenic emissions of volatile organic compounds (VOCs) are about an order of magnitude larger than those from anthropogenic sources (Benkovitz et al., 2004; Guenther et al., 1995). VOCs emitted from forest environments account for approximately half of the reactive carbon introduced globally into the atmosphere (Guenther, 2002), with isoprene alone contributing about a third of the worldwide VOC emissions (Guenther et al., 2006). Biogenic VOCs are typically more reactive than anthropogenic ones and more readily contribute ~~forming~~ to the formation of secondary organic aerosols (Atkinson and Arey, 1998; Carlton et al., 2009; Claeys et al., 2004; Griffin et al., 1999; Helmig et al., 2006; Kanakidou et al., 2005; Kavouras et al., 1998). Oxygenated VOCs (oVOCs) constitute an abundant class of atmospheric VOCs. oVOCs can be emitted from biogenic and anthropogenic sources, and are often produced by secondary reactions (mainly VOC oxidation) in the atmosphere ~~ie reactor~~ (Galbally and Kirstine, 2002; Jacob et al., 2002). The most abundant biogenic oVOC in the troposphere is methanol, typically followed by acetone, formaldehyde, and acetaldehyde. A vast number of other oVOCs are also present in the atmosphere (Goldstein and Galbally, 2007). In particular, oxidation products of isoprene, such as methyl vinyl ketone (MVK), methacrolein (MACR), isoprene hydroperoxides (ISOPOOHs), and isoprene epoxydiols, play a critical role in reactive carbon cycling, SOA formation, and modulation of the atmospheric oxidation capacity (Rivera-Rios et al., 2014). Atmospheric oVOCs are removed via SOA formation, photooxidation, or dry and wet deposition. Their atmospheric lifetimes vary widely depending on functionality, from several hours for MVK, MACR, and ISOPOOH, to 10 days for methanol and 1 month for acetone.

Forests are not only major sources of biogenic VOCs but can also act as efficient oVOC sinks. oVOCs can be lost by dry deposition onto plant surfaces or by uptake into the plant through the stomata. Recently, plant uptake has been shown to be a more significant mechanism for oVOC removal than previously assumed (Karl et al., 2010). Plant uptake  
5 of oVOCs requires an in-vivo sink, such as enzymatic consumption (Cojocariu et al., 2004). Despite many studies documenting plant uptake, the mechanisms of these sinks, which vary across compounds, are not yet fully understood. Uptake of methanol and acetaldehyde by plants has been reported (Jardine et al., 2008; Laffineur et al., 2012), and mechanisms for their metabolism within plants have been proposed (Gout, 2000;  
10 MacDonald and Kimmerer, 1993). As both biogenic sources and sinks of these compounds exist, bidirectional exchange can be observed (Jardine et al., 2008; Karl et al., 2010; Laffineur et al., 2012; Misztal et al., 2011; Schade et al., 2011). Similarly, there are many reports of negative acetone fluxes at ecosystem-level (Karl et al., 2004, 2005), suggesting deposition or plant uptake. Yet, evidence for acetone uptake at plant level is inconclusive  
15 (Cojocariu et al., 2004; Tani and Hewitt, 2009), and no mechanism driving acetone uptake by plants is known (Cojocariu et al., 2004).

A plant sink of isoprene oxidation products methacrolein (MACR) and methyl vinyl ketone (MVK) has also been demonstrated (Andreae et al., 2002; Karl et al., 2004, 2005,  
20 2010), suggesting a metabolic consumption of these compounds, especially given that MVK and MACR are ~~quite~~ toxic. For MACR, detoxification mechanisms have already been elucidated (Muramoto et al., 2015), whereas knowledge of metabolic pathways consuming MVK is scant. At the same time, some studies have suggested that isoprene plays an antioxidant role within plants, reacting with reactive oxygen species (ROS) to

produce MVK and MACR, which are then emitted (Fares et al., 2015; Jardine et al., 2012). Production and emission of isoprene oxidation products by plants is still matter of debate, but if it does occur, it could explain why a detoxification mechanism for MVK and MACR also exists. Moreover, very little is known about plant emission and uptake of other  
5 common biogenic oVOCs, such as methyl ethyl ketone (MEK). MEK can lead to ozone and PAN production in the atmosphere (Pinho et al., 2005) and photochemical odd-hydrogen formation in the upper troposphere (Atkinson, 2000; Baeza Romero et al., 2005). Recent studies point out the great importance of biogenic MEK sources (Yáñez-Serrano et al., 2016); however, the origin of biogenic MEK remains unclear.

10

Among observed oVOCs, several belong to the class of benzenoid compounds, which are believed to be synthesized and emitted by vegetation under stress conditions and as chemical signals, although direct observations of such compounds are still very limited (Bouvier-Brown et al., 2009; Heiden et al., 1999; Jardine et al., 2010; Kim et al., 2010;  
15 Leone and Seinfeld, 1984; Misztal et al., 2010, 2015; Owen et al., 2002; White et al., 2009). Uptake of benzenoid compounds such as phenol and benzaldehyde has been seen in houseplants but has not been reported in forest environments so far (Kondo et al., 1996; Tani and Hewitt, 2009). In general, the impact of vegetation on the atmospheric concentrations of benzenoid compounds has usually been overlooked. Only recently, the  
20 first suggestion emerged that plant emissions of benzenoid compounds might be comparable to those from anthropogenic sources (Misztal et al., 2015).

In general, direct plant-level field observations of the balance between emissions and deposition of oVOCs are scarce. The present study aims to directly investigate exchange

of oVOCs at branch level in a forest environment. The compounds include methanol, acetone, acetaldehyde, MEK, the isoprene oxidation products MACR, MVK, and ISOPOOH, and the aromatic compound benzaldehyde. Isoprene and monoterpenes are also included as references. Emissions and/or uptake of each compound compared with the literature reports and with recent canopy-scale flux measurements at a nearby site (McKinney et al., 2011). Moreover, observations were corroborated with ancillary fumigation experiments with oVOC standards. The results i) advance the current understanding of oVOC exchange, suggesting plant detoxification of MVK and a mechanistic explanation for the emission of MEK; ii) provide direct evidence of oVOC exchange at branch level, testing in particular the presence of bidirectional exchange of benzenoids; iii) suggest avenues for further mechanistic studies on oVOC exchange.

## 2 Materials and Methods

### 2.1 Forest site description

Experiments were performed at Harvard Forest, a New England mixed forest located in Petersham, MA (42.54° N, 72.17° W, elevation 340 m), a rural area in central Massachusetts. Measurements were made from a walk-up tower (30 m) installed in 2013 and surrounded predominantly by red oak trees. The tower is about ~~35200~~ 35200 m SW of the Environmental Measurement Site (EMS) where previous ~~B~~VOC measurements were taken at ecosystem-level (McKinney et al., 2011; Moody et al., 1998). A survey of the tree species present at EMS is reported in Urbanski et al. (2007): The mixed forest stand encompasses red oak (36 % of biomass), red maple (22 %), hemlock (13 %), red pine (8 %), birch (5 %), white pine (6 %), cherry (3 %), spruce (2 %) and beech (0.8 %). The species distribution at the walk-up tower site is similar but not identical. The tower is

constructed on slightly hilly terrain surrounded by forest for several kilometers. The closest paved road is about 1.5 km and the nearest town is approximately 5 km distant. Influences of anthropogenic VOCs come from regional-scale transport especially from cities on the East Coast (including Boston, New York, and Albany, located approximately 110 km to the east, 300 km to the southeast, and 130 km to the west of the forest, respectively). Midday ozone concentrations during summers are typically  $40 \pm 12$  ppbv for periods of NW winds and  $58 \pm 19$  ppbv for periods of SW winds, while  $\text{NO}_y$  (i.e. the sum of nitric oxide, nitrogen dioxide, nitric acid, and organic nitrates) are  $2.3 \pm 1.4$  ppbv and  $5.1 \pm 2.7$  ppbv, respectively (Moody et al., 1998; Munger et al., 1996).

The forest stand is 85-120 y old and has been mainly undisturbed over the past 70 years (Urbanski et al., 2007). The canopy is about 22.5 m high. Measurements of forest leaf area index are routinely made as well as meteorological data (Boose, 2001). Branch enclosure measurements were made using canopy-top branches of red oaks located on the south or east side of the tower.

## 2.2 Vertical BVOC concentration profiles

Air samples were drawn from several heights on the tower (7.5, 15, 22.5, 30 m) through FEP Teflon tubing (0.635250 cm ~~inch~~ outer diameter x 0.39156 cm ~~inch~~ inner diameter) connected to a Teflon valve system (NRResearch, Inc.) located at 22.5 m on the tower. A 40 m FEP Teflon (0.635250 cm ~~inch~~ OD x 0.39156 cm ~~inch~~ ID) line connected the valve system with a shed located at the bottom of the tower and housing the analytical instrumentation. The air flow rate through the line was set to ca.  $11 \text{ L min}^{-1}$  ~~slm~~ to achieve residence times of ca. 7 s. A filter (2.0- $\mu\text{m}$  pore size 47-mm diameter Zefluor teflon filter, Pall Corp.) was



placed at each inlet to prevent particles from entering. Filters were replaced weekly. The valve system was set to cycle between the inlets every 10 min (30 min in the case of tower top inlet) so that all inlets were measured in random order every 60 min.

~~The valve system was set to randomly cycle between the inlets every 10 min (30 min in the case of tower top inlet).~~ The inlets not sampled during a given measurement cycle were flushed by a second pump. In this way air was flowing continuously through all inlet lines, preventing signal transients upon valve switching. 200 sccm of the sample flow was drawn continuously by a Proton Transfer Reaction - Time of Flight - Mass Spectrometer (PTR-ToF-MS) equipped with a Switchable Reagent Ion system (PTR/SRI-ToF-MS) for analysis. Measurements were taken between July 17, 2014, and August 8, 2014. The instrument was operated in  $\text{NO}^+$  mode during the period July 17 - 23, and in  $\text{H}_3\text{O}^+$  mode otherwise (See Section 2.4 for details).

Background measurements were made by adding zero air to the inlet line at tower top through a third FEP Teflon line. Zero air was generated by compressing ambient air and delivering it to a catalytic converter consisting of  $\text{pPd}$  Palladium coated alumina heated to 290°C (Aadco Instruments ZA30). Background measurements were taken automatically every 11 h for 30 min.

### 2.3 Branch enclosure BVOC exchange measurements

Red oak branches accessible from the walk-up tower were selected for branch enclosure measurements. Three cylindrically shaped PFA Teflon branch enclosures (ca. 5 L) were used to encase three unshaded upper canopy branches (22.5 m above ground). At the end of the experiments leaves were collected and leaf areas were measured via the software

ImageJ [(version 1.47; (Schneider et al., 2012)]. A fourth, empty enclosure ~~bag not containing a branch~~ was placed close to the others to serve as a background.

Ambient air was continuously supplied to each enclosure via FEP Teflon tubing (0.635250 ~~cm<sup>in</sup>~~ OD x 0.39456 ~~cm<sup>in</sup>~~ ID) at a flow at of ca. 2.5 ~~L min<sup>-1</sup>slm~~ maintained by a pump. Flows were measured by flow meters (Honeywell AWM5000 series) calibrated using Bios DryCal Flow Calibrators (Bios Defender 520-H and 520-L). Branch enclosure air was drawn through FEP Teflon tubing (0.635250 ~~cm<sup>in</sup>~~ OD x 0.39456 ~~cm<sup>in</sup>~~ ID) to a Teflon valve system located at 22.5 m on the tower. The valve system previously described for  
10 gradient measurements was reconfigured for this purpose. The air flow rate through the sample line was set at 2 ~~L min<sup>-1</sup>slm~~ to achieve residence times in the enclosure sample line of 38 s. Outlet flows were set lower than the inlet flows and excess air was allowed to exit the enclosures through a 30 cm length of FEP Teflon tubing (0.635250 ~~cm<sup>in</sup>~~ OD x 0.39456 ~~cm<sup>in</sup>~~ ID). In this way a slight overpressure was created in the enclosures preventing outside  
15 air from entering. Each branch enclosure was sampled for 10 min, followed by 10 minutes from the empty enclosure. The valve system was set to cycle among the branch enclosures so that all of them were measured in random order. ~~Each branch enclosure was sampled for 10 min, followed by 10 minutes from the empty enclosure. The valve system was set to randomly cycle among the branch enclosures.~~ The first 3 min of each measurement were  
20 discarded to avoid artifacts from the previous sample. The enclosures not sampled during a given measurement cycle were flushed by a second pump. In this way air was flowing continuously though all enclosures and inlet lines, preventing signal transients upon valve switching.

200 sccm of the sample flow was drawn continuously by a PTR/SRI-ToF-MS instrument for analysis. VOC exchange rates were computed from differences between the concentration in the branch enclosure and those in the empty ~~bag~~enclosure, converted in  $\text{nmol m}^{-2} \text{h}^{-1}$  using the measured leaf area and ingoing flow rate. Measurements were taken  
5 between August 14, 2014, and September 1, 2014. The present study reports measurements for a particular period and compares them with canopy-level fluxes measured in similar periods but different years. A long-term survey of flux dynamics is beyond the scope of the present paper. The instrument was operated in  $\text{NO}^+$  mode during the periods August 14 - 21 and August 28 - September 1, and in  $\text{H}_3\text{O}^+$  mode otherwise (See Sect.~~ion~~ 2.4 ~~for~~  
10 details).

On September 2 ancillary fumigation experiments were carried out. Gas cylinders containing known amounts of the target VOCs (Scott Specialty Gases, Inc.) were diluted with zero air using mass flow controllers (MKS Instruments) and delivered to the branch  
15 enclosures. Tested VOCs included isoprene ( $80 \text{ ppm} \pm 5\%$  in the gas cylinder), MVK ( $1 \text{ ppm}$ ), MACR ( $1 \text{ ppm} \pm 5\%$ ), acetone ( $1 \text{ ppm} \pm 5\%$ ), and methanol ( $1 \text{ ppm} \pm 5\%$ ). For each VOC different concentrations in the range 0-70 ppbv (0-700 for isoprene) were delivered to the branch enclosures. Flow rates were set as previously described. For each concentration step, the enclosures, including the empty one, were measured in random  
20 order and the signal was allowed to stabilize (typically for tens of minutes) before a measurement was made. The PTR/SRI-ToF-MS was operated in  $\text{NO}^+$  mode. VOC exchange rates were computed as described above. During the ancillary experiments daytime temperature and PAR were in the ranges  $27.1\text{-}28.2 \text{ }^\circ\text{C}$  and  $894\text{-}1584 \text{ } \mu\text{mol m}^{-2} \text{ s}^{-1}$ , respectively; while nighttime temperature was in the range  $20.7\text{-}22.2 \text{ }^\circ\text{C}$ .

## 2.4 PTR/SRI-ToF-MS operation and data analysis

VOC measurements were performed by a PTR/SRI-ToF-MS 8000 (Ionicon Analytik GmbH, Innsbruck Austria) equipped with a switchable reagent ion system (Jordan et al., 2009), allowing either  $\text{NO}^+$  or  $\text{H}_3\text{O}^+$  primary ion chemistry.

5 Details of the instrument operation are reported in the Supplementary Material.

~~In  $\text{H}_3\text{O}^+$  mode the drift tube conditions were: 2.19 mbar drift pressure, 542 V drift voltage, 60 °C drift tube temperature. The resulting  $E/N$  ratio was ca. 125 Townsend (Td) ( $N$  corresponding to the gas number density and  $E$  to the electric field strength;  $1 \text{ Td} = 10^{17} \text{ Vcm}^2$ ). The PTR-ToF-MS ion source produces  $\text{H}_3\text{O}^+$  primary ions at high purity, with a fraction of the spurious primary ions  $\text{NO}_2^+$  and  $\text{O}_2^+$  of 0.04-0.3% and 0.8-1.2%, respectively, with respect to the  $\text{H}_3\text{O}^+$  ion signal. In  $\text{NO}^+$  mode the drift tube conditions were: 2.21 mbar drift pressure, 296 V drift voltage, 90 °C drift tube temperature. The resulting  $E/N$  ratio was ca. 74 Townsend (Td). During the measurements the fraction of the spurious primary ions  $\text{NO}_2^+$ ,  $\text{O}_2^+$  and  $\text{H}_3\text{O}^+$  were 1.9-2.3 %, 0.1-0.5 % and 0.1-0.3 % respectively, relative to the  $\text{NO}^+$  signal. A time-of flight (ToF) mass analyzer operated in its standard configuration (V mode) was used to separate and detect the ions exiting the drift region. The sampling time per channel of ToF acquisition was 0.1 ns, amounting to 350,000 channels for a  $m/z$  spectrum ranging up to  $m/z = 400$ .~~

10  
15

### 2.4.1 $\text{NO}^+$ chemistry in SRI-ToF-MS instrument

20 ~~Previous ion chemistry investigations (Amelynck et al., 2005; Jordan et al., 2009; Knighton et al., 2009; Spanel and Smith, 1998) employing  $\text{NO}^+$  as primary ion have shown that four reaction pathways dominate. They feature charge transfer,~~

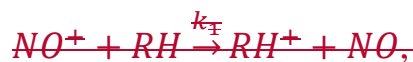

(5a)

hydride ion transfer,

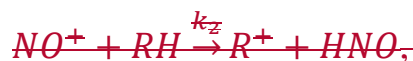

(5b)

hydroxide ion transfer,

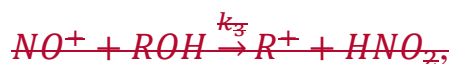

(5c)

and three body association reactions,

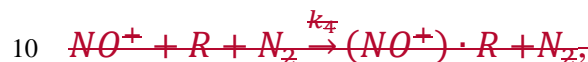

(5d)

Isoprene and monoterpenes have ionization potentials lower than NO and charge transfer reactions with NO<sup>+</sup> ions (5a) occur at collision rates (Karl et al., 2012). Reaction (5a) does not proceed for VOCs having ionization potentials higher than that of NO (9.26 eV) (Ebata et al., 1983).

The reaction of aldehydes with NO<sup>+</sup> typically proceeds mainly through hydride transfer (channel 5b), whereas that of ketones is mainly through three body association (channel 5d). As a result, in contrast to H<sub>3</sub>O<sup>+</sup>, NO<sup>+</sup> chemistry allows separation of isomeric ketones and aldehydes (Jordan et al., 2009). For example, in H<sub>3</sub>O<sup>+</sup> mode, MACR and MVK (C<sub>4</sub>H<sub>6</sub>O) are indistinguishable as both are detected in the protonated ion form at m/z 71.049 (C<sub>4</sub>H<sub>7</sub>O<sup>+</sup>). In NO<sup>+</sup> mode MACR yields m/z 69.033 (C<sub>4</sub>H<sub>5</sub>O<sup>+</sup>) from reaction 5b and, at a

much reduced rate,  $m/z$  100.039 ( $C_4H_6O \cdot NO^+$ ) from reaction 5. MVK yields only  $m/z$  100.039 from reaction 5d (Liu et al., 2013). Thus, concentrations of MVK and MACR can be independently determined (Liu et al., 2013). Acetone and MEK also proceed via three body association (5d) and yield ions at  $m/z$  88.039 ( $C_3H_6O \cdot NO^+$ ) and  $m/z$  102.055 ( $C_4H_8O \cdot NO^+$ ), respectively. Aldehydes such as acetaldehydes and benzaldehyde react at collision rate via mainly hydride ion transfer (5b). Methanol does not react with  $NO^+$ .

### 2.4.2 $H_3O^+$ chemistry

The traditional operational mode of PTR/SRI ToF MS is  $H_3O^+$  ion chemistry, indicated as PTR ToF MS. We refer to the reviews on the subject for details (Blake et al., 2009; de Gouw and Warneke, 2007). Briefly, the analyte gas mixture enters the drift tube, where molecules having a Gibbs energy of protonation (typically approximated with proton affinity) higher than water by more than  $35 \text{ kJ} \cdot \text{mol}^{-1}$  (Bouchoux et al., 1996) efficiently react with the  $H_3O^+$  primary ions by proton transfer

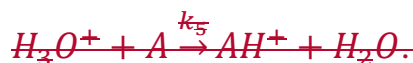

(6)

Alkenes and oVOCs, including all of those in this study, typically exhibit proton affinities high enough for detection using  $H_3O^+$  ion chemistry.

### 2.4.3 Spectral analysis

VOC concentrations were calculated from the ion signal at each corresponding mass to-charge ratio. To correct for count losses due to the detector dead time, an off-line procedure based on Poisson statistics was applied (Cappellin et al., 2011a; Titzmann et al., 2010). An internal mass calibration procedure was used in order to achieve a mass accuracy better

than 0.001 Th (Cappellin et al., 2010). Further processing included baseline removal and peak area extraction using the procedure described by (Cappellin et al., 2011b). An optimized peak shape determined from the measured spectra was used for fitting.

The instrument response to each VOC was calibrated using standard gas cylinders (Scott Specialty Gases/Air Liquide). Gas standard 1 contained isoprene (80.0 ppm). Gas standard 2 contained isoprene (1.07 ppm) and MACR (1.07 ppm). Gas standard 3 contained MEK (1.09 ppm), MVK (1.09 ppm), acetone (1.09 ppm), acetaldehyde (1.09 ppm), and methanol (1.09 ppm). Zero air generated as described previously was used for dilution. In the case of compounds for which gas standards were not available (benzaldehyde, 2-butanol, 3-buten-2-ol, monoterpenes), absolute concentrations were estimated with a theoretical approach (Cappellin et al., 2012) using reaction rates with the primary ion computed at the set drift tube conditions (Su, 1994). This method was shown to estimate concentrations within a 10% uncertainty, under certain instrumental conditions (Cappellin et al., 2012; Müller et al., 2014).

Isoprene signal was monitored on the ion peaks 69.070 ( $C_5H_9^+$ ) for  $H_3O^+$  mode and 68.062 ( $C_5H_8^+$ ) for  $NO^+$  mode (Karl et al., 2012). At the site interferences from MBO in  $H_3O^+$  mode are negligible, given the species emitting the BVOCs (Harley et al., 1998; McKinney et al., 2011). Methanol is detected at  $m/z$  33.033 in  $H_3O^+$  mode. Previous studies have established that it is free from contaminations (de Gouw et al., 2003; Warneke et al., 2003). In  $NO^+$  mode it was not possible to detect methanol as it does not react with the primary ion. MEK was monitored on the ion peaks 73.065 ( $C_4H_9O^+$ ) for  $H_3O^+$  mode and 102.055 ( $C_4H_8O \cdot NO^+$ ) for  $NO^+$  mode. Influence of butanal in  $H_3O^+$  mode might be present. However, no butanal has been found to be emitted by red oak branches (Helmig et al.,

1999). Moreover, it has not been detected in past investigations using GC separation prior to PTR-MS analysis (de Gouw et al., 2003). Acetone was monitored on the ion peaks 59.049 ( $C_3H_7O^+$ ) for  $H_3O^+$  mode and 88.039 ( $C_3H_6O \cdot NO^+$ ) for  $NO^+$  mode. Influence from propanal in  $H_3O^+$  mode, although possible, is unlikely at the site (de Gouw et al., 2003; McKinney et al., 2011; Warneke et al., 2003), as it is a compound usually present in urban areas. Acetaldehyde is detected at  $m/z$  45.033 ( $C_2H_5O^+$ ) in  $H_3O^+$  mode. Acetaldehyde is not reported in  $NO^+$  mode as the main ion 43.018 ( $C_2H_3O^+$ ) is a common fragment, therefore not a reliable signal for acetaldehyde. The ion at  $m/z$  74.024 ( $C_2H_4O \cdot NO^+$ ), from the association reaction of acetaldehyde with  $NO^+$  had a weak signal and was discarded.

10 Benzaldehyde was monitored on the ion peaks 107.049 ( $C_7H_7O^+$ ) for  $H_3O^+$  mode and 105.033 ( $C_7H_5O^+$ ) for  $NO^+$  mode. Given the relatively distinctive molecular formula of the aromatic benzaldehyde and the very good consistency between  $H_3O^+$  and  $NO^+$  data, influences on the signal from other compounds are not expected. Monoterpenes [generally constituted by numerous compounds sharing the same  $m/z$ , (Loreto et al., 1996)] were

15 monitored on the ion peaks 137.132 ( $C_{10}H_{17}^+$ ) for  $H_3O^+$  mode and 136.125 ( $C_{10}H_{16}^+$ ) for  $NO^+$  mode. (de Gouw and Warneke, 2007) show that monoterpene measurements are free from interferences in  $H_3O^+$  mode. No contaminants are expected in  $NO^+$  mode.

In  $H_3O^+$  mode MACR and MVK lead to indistinguishable isomeric ions at  $m/z$  71.049 ( $C_4H_7O^+$ ). Moreover, isoprene hydroxy hydroperoxide isomers (ISOPOOH) decompose on instrument surfaces to form MVK or MACR, which is also detected at  $m/z$  71.049 (Liu, 2015; Liu et al., 2013; Rivera Rios et al., 2014). As discussed in Section 2.4.1, in  $NO^+$  mode MACR is detected mainly at  $m/z$  69.034 ( $C_4H_5O^+$ ) with a small contribution at  $m/z$  100.039 ( $C_4H_5O \cdot NO^+$ ) whereas MVK is detected only at  $m/z$  100.039. The isoprene



hydroperoxide isomers 4,3-ISOPOOH (ISOPDOOH) and 3,4-ISOPOOH (ISOPCOOH) decompose to MACR and so can also produce a signal at  $m/z$  69.034 (Liu et al., 2016; Rivera-Rios et al., 2014). ISOPCOOH concentrations are, however, not relevant under atmospheric conditions and can be neglected. Therefore this peak corresponds to MACR + ISOPDOOH. Analogously, in  $\text{NO}^+$  mode 1,2-ISOPOOH (ISOPBOOH) produces MVK which yields product ions at  $m/z$  100.039 (Liu et al., 2016; Rivera-Rios et al., 2014). After correction for the contribution from MACR + ISOPDOOH, the peak at 100.039 thus corresponds to the sum MVK + ISOPBOOH.

In  $\text{H}_3\text{O}^+$  mode alcohols commonly undergo proton transfer reactions often followed by the elimination of a water molecule, while in  $\text{NO}^+$  mode alcohols typically react via hydride ion transfer (Spanel and Smith, 1997). In the ancillary fumigation experiments the alcohols 2-butanol and 3-buten-2-ol were monitored on  $m/z$  73.065 ( $\text{C}_4\text{H}_9\text{O}^+$ ) and  $m/z$  71.049 ( $\text{C}_4\text{H}_7\text{O}^+$ ), respectively, in  $\text{NO}^+$  mode. In  $\text{H}_3\text{O}^+$  mode they were monitored on  $m/z$  57.070 ( $\text{C}_4\text{H}_9^+$ ) and 55.054 ( $\text{C}_4\text{H}_7^+$ ), respectively (Spanel and Smith, 1997).

### 3 Results and Discussion

Averaged rates of exchange of the most important oVOCs and volatile isoprenoids measured in the present experiments at Harvard Forest are reported in Table 1 and 2 and Figure 1. The reported compounds were selected based on canopy-scale flux measurements previously performed at a nearby site (McKinney et al., 2011) with the addition of benzaldehyde. The results differ strongly among compounds, and each compound is discussed separately below. The main focus is investigating factors affecting

bidirectional exchange of oVOCs with the forest upper canopy. Vertical concentration profiles and corollary fumigation experiments are used to corroborate conclusions.

### 3.1 Isoprene

As expected, isoprene emission showed a diel cycle peaking in the middle of the day and dropping ~~to zero~~ at night (Figure 1). Isoprene emission during daytime averaged to ca.  $3 \cdot 10^4 \text{ nmol m}^{-2} \text{ h}^{-1}$  (ca.  $2 \text{ mg m}^{-2} \text{ h}^{-1}$ ) on a leaf area basis, with peaks of  $32 \cdot 10^4 \text{ nmol m}^{-2} \text{ h}^{-1}$  ( $22 \text{ mg m}^{-2} \text{ h}^{-1}$ ). No isoprene uptake was detected. Likewise, ancillary experiments (Table 1) showed no deposition during isoprene fumigation of the same upper canopy branches. Figure 2 shows daytime and nighttime isoprene concentrations at different heights within and above the canopy. This vertical profile is consistent with an isoprene source within the canopy during the day, while it suggests that there is no isoprene emission nor deposition at night. Vertical isoprene concentration profiles (Figure 2) are also consistent with a source within the canopy during the day and no emissions or deposition at night.

Literature findings are in agreement with these results. Sharkey et al. (1996), reported emissions of isoprene of ca.  $15 \cdot 10^4 \text{ nmol m}^{-2} \text{ h}^{-1}$  (at  $30^\circ\text{C}$  and PPFD of  $1000 \mu\text{mol m}^{-2} \text{ s}^{-1}$ ) from red oak leaves in a mixed forest. McKinney et al. (2011) reported isoprene canopy fluxes at an adjacent site in the range ca.  $1\text{-}8 \text{ mg m}^{-2} \text{ h}^{-1}$  on a ground area basis. This magnitude is also consistent with the current results, which correspond to daytime average isoprene fluxes of ca.  $2\text{-}3 \text{ mg m}^{-2} \text{ h}^{-1}$  on a ground area basis. The branch enclosure data was scaled to ecosystem-level fluxes considering that the average LAI was 5.12 and assuming that the only isoprene emitter in the forest footprint is red oak, representing c.a. 41% of total leaf area where the fluxes were measured, and that the reduction in isoprene

emission due to inhomogeneity throughout the canopy is 25-50%. To the best of our knowledge, no isoprene uptake has been reported to date.

### 3.2 Isoprene oxidation products

5 The major atmospheric source of MVK, MACR, and ISOPOOH is gas-phase isoprene oxidation. If there is a plant or surface sink of these compounds, a negative flux would be expected. The existence of a sink is supported by many canopy-level studies, which show deposition of MVK + MACR<sup>1</sup> to forest canopies (Andreae et al., 2002; Karl et al., 2004, 2005, 2010), as well as by plant-level studies that suggest both surface deposition and plant  
10 uptake of these compounds may occur (Fares et al., 2015). On the other hand, episodes of positive canopy fluxes of MACR + MVK have been detected at some sites ([Brilli et al., 2016](#); [Kalogridis et al., 2014](#); [Schallhart et al., 2016](#); [Spirig et al., 2005](#))(Spirig et al., 2005). These could be due to spatial gradients and inhomogeneities in isoprene oxidation or possibly to a biogenic source. To date, emission of isoprene oxidation products directly  
15 from plants has been hypothesized but rarely reported (Jardine et al., 2012). A plant source of these compounds could be masked at the canopy scale if there is also a plant sink.

Branch enclosure measurements of isoprene oxidation product fluxes from high isoprene emitters such as red oak are challenging due to possible interferences from the high levels  
20 of isoprene present in the enclosures during daylight. These interferences can arise from gas phase oxidation of isoprene in the sampling system or in the PTR-MS drift tube. As a result, only measurements during darkness are reported for isoprene oxidation products.

---

<sup>1</sup> Previous studies reporting fluxes of MVK+MACR were actually measuring MVK+MACR+ISOPOOH (Rivera-Rios et al., 2014).

For daytime, a constraint of  $38 \text{ nmol m}^{-2} \text{ h}^{-1}$  could be inferred for MVK+MACR+ISOPOOH maximum emission but the actual presence of emissions could not be proved due to interferences from high levels of isoprene, as explained above. During nighttime, no net emission of MACR+MVK+ISOPOOH was detected. Deposition of MACR+MVK+ISOPOOH (Fig. ~~ure~~ 1) up to ca.  $-23 \text{ nmol m}^{-2} \text{ h}^{-1}$  (Table 1) was measured during darkness on August 25-28, when ambient air concentrations of MACR+MVK+ISOPOOH were higher than usual (up to ca. 1 ppbv). Karl et al. (2010) suggested that the uptake of MVK and MACR by vegetation occurs through stomata and is described by Fick's law. The presence of a sustained negative flux suggests plant uptake, which implies that stomata were still (partially) open at night. This is possible (Niinemets and Reichstein, 2003), and corroborated by the fact that the water vapor emission signal ( $m/z$  48.008 in  $\text{NO}^+$  mode, corresponding to  $\text{H}_2\text{O}\cdot\text{NO}^+$ ) remains positive at night, although decreasing with respect to the daytime emission (data not shown). More insight was provided by the ancillary experiments (Table 3 and Fig. ~~ure~~ 3) where an inverse relationship between deposition rate and MACR (or MVK) concentration is established during either day or night, consistent with Fick's law (Karl et al., 2010).

The absence of uptake saturation (Fig. ~~ure~~ 3) suggests the existence of a degradation mechanism for isoprene oxidation products inside leaves. Isoprene oxidation products are thought to be cytotoxic and their rapid removal may increase plant survival under stress conditions (Oikawa and Lerdau, 2013; Vollenweider et al., 2000). Muramoto et al. (2015) studied the uptake of MACR by tomato plants and proved that MACR concentrations up to more than 100 ppmv are efficiently degraded by glutathionylation and enzymatic reduction within the leaves. Glutathionylation may be a more efficient mechanism for

MACR removal than other hypothesized pathways, e.g. enzymatic degradation by aldehyde dehydrogenase (Karl et al., 2010; Kirch et al., 2004). Muramoto et al. (2015) identified release of isobutyraldehyde (5.8% of the fumigated MACR) produced by reduction of MACR. Reduction of carbonyl compounds can therefore be a mechanism of  
5 detoxification of oVOC deposited to vegetation.

Contrary to MACR, the fate of MVK taken up by leaves is unknown. Interestingly, in fumigation experiments, the observed uptake of MVK was matched by an emission of MEK, 2-butanol and 3-buten-2-ol of similar magnitude in total (see e.g. Fig. 3).  
10 Specifically, emission of MEK accounted for  $82\pm 5\%$  of MVK uptake, while emission of 2-butanol and 3-buten-2-ol accounted for  $14\pm 4\%$  and  $4\pm 1\%$ , respectively. This finding suggests complete conversions of MVK into other volatiles, predominantly MEK. A consistent explanation is enzymatic reduction. The reduction of the alkene moiety of MVK leads to MEK formation. It is hypothesized that this reduction may be catalyzed by MEK  
15 oxidoreductase, an NAD(p)-dependent enone reductase. Enzymes with enone reductase activity have been found in prokaryotes and eukaryotes, including plants (Kergomard et al., 1988; Shimoda et al., 2004; Tang and Suga, 1994; Wanner and Tressl, 1998). For instance Wanner and Tressl (1998) purified and characterized two enone reductases from the cytosolic fraction of *Saccharomyces cerevisiae*, and show that they accept MVK as a  
20 substrate to form MEK. Shimoda et al. (2004) showed that cell extracts of cyanobacterium *Synechococcus* sp. PCC7942 reduced a variety of cyclic and acyclic enone substrates, including MVK, to their corresponding alkyl ketones. Enone reductases in other organisms can also catalyze this transformation. Kergomard et al. (1988) demonstrated that unsaturated ketones were reduced by various plant cells. The formation of 3-buten-2-ol is

obtained via reduction of the carbonyl moiety of MVK and 2-butanol is the result of the reduction of both the carbonyl and the alkene moiety (French, 1970). The ratio of 3-buten-2-ol ~~to~~ and MEK ~~production~~emission, namely  $0.05 \pm 0.02$ , provides an indication of the relative importance of the two pathways (reduction of the carbonyl moiety ~~\_first\_~~versus reduction of the alkene moiety ~~first~~) for MVK detoxification.

### 3.3 Methyl ethyl ketone (MEK)

Branch level emission of MEK in red oak upper canopy ranged between 0-460  $\text{nmol m}^{-2} \text{h}^{-1}$  (Table 1, Table 2). Emissions peaked in the middle of the day and dropped at night. Daytime emissions averaged 40  $\text{nmol m}^{-2} \text{h}^{-1}$ , decreasing to 5  $\text{nmol m}^{-2} \text{h}^{-1}$  at nighttime. When scaling from branch level to canopy-scale under the same assumptions used in Section 3.1, daytime fluxes in the range 3-12  $\mu\text{g m}^{-2} \text{h}^{-1}$  on a ground area basis can be estimated. No deposition of MEK was measured at branch level during the campaign.

Very little is known about MEK emission and deposition in forest environments. Kim et al. (2010) detected significant amounts of MEK over a Ponderosa pine forest in Western Colorado during both days and nights in summer, and Karl et al. (2005) measured positive fluxes of MEK over a loblolly pine plantation. Brilli et al. (2016) reported positive and negative MEK fluxes at canopy level over a poplar plantation. In laboratory experiments, Holzinger et al. (2000) measured emission of MEK from leaves of young *Quercus ilex* trees in the range of 5-13  $\text{nmol m}^{-2} \text{min}^{-1}$ . MEK was also detected in fire plumes (de Gouw et al., 2006), over pasture (Kirstine et al., 1998) and over cut grass and clover (de Gouw et al., 1999). During summer 2005 and 2007, McKinney et al. (2011) measured at Harvard Forest ecosystem-scale fluxes of  $m/z$  73, which was attributed to MEK, with daytime

emissions of 20-80  $\mu\text{g m}^{-2} \text{h}^{-1}$  on a ground area basis, comparable to those found in our experiments.

McKinney et al. (2011) reported slightly negative MEK fluxes during nighttime, which  
5 were not seen in our experiment on branches. Perhaps at night MEK sinks other than leaf  
uptake are present. Our nighttime vertical profiles of MEK (Fig. 2) show a decreasing  
trend with height, with MEK concentrations lower under the canopy (0.12 ppbv on  
average) than within (0.18 ppbv) and above canopy (0.2 ppbv). This may be consistent  
with a ground sink causing an ecosystem-scale negative flux of MEK during nighttime.  
10 Karl et al. (2005), measuring vertical MEK profiles within a loblolly pine plantation, also  
deduced a ground sink. MEK uptake in houseplants (Tani and Hewitt, 2009) and in  
*Camellia sasanqua* (Omasa et al., 2002) has been reported, although the authors noted  
limitations in the metabolic capacity for MEK uptake by leaf tissues (Omasa et al., 2002).  
In contrast, *Populus nigra* does not take up MEK (Omasa et al., 2000).

15

The metabolic pathway leading to the emission of MEK by plants is still unclear. As  
discussed in Section 3.2, MEK might be produced by MVK detoxification via enzymatic  
reduction. During daytime, the sources of MVK that might undergo reduction in the leaf  
are twofold. First, there is uptake of atmospheric MVK. Second, given the fact that  
20 *Quercus rubra* is a strong isoprene emitter, MVK might be produced inside the leaves  
upon reaction of reactive oxygen species (ROS) with isoprene. ROS produced upon heat  
stress in genetically engineered *Arabidopsis* and tobacco plants has been shown to react  
with isoprene (Velikova et al., 2008; Vickers et al., 2009) and this is thought to produce  
cytotoxic MVK, which may eventually be released in the atmosphere (Fares et al., 2015;

Jardine et al., 2012). We have shown that MVK is detoxified into MEK, whose emission is therefore an indicator of MVK presence in leaves. As an indirect confirmation for this argument, during nighttime, when no isoprene is produced (Loreto and Sharkey, 1990), isoprene oxidation does not occur, and MEK is generally not formed. Moreover, as already  
5 mentioned, nighttime deposition of MVK was occasionally observed (e.g. on 25-28 August), which should trigger MEK emission. As expected, during nighttime a significant negative correlation was found (Fig. 4; Pearson correlation coefficient 0.75;  $p < 0.001$ ), with MEK emission rates not exceeding the corresponding deposition rates of MVK+MACR+ISOPOOH, which represent the upper limits for MVK uptake rates.

10

Due to unreliable estimates of daytime MVK uptake, a plot with daytime MEK emission (similar to Fig. 4) cannot be produced. However, maximum MVK uptake rates can be estimated from measured MVK concentrations based on the ancillary MVK fumigation experiments. For example, maximum MVK uptake rates of ca.  $4 \text{ nmol m}^{-2} \text{ h}^{-1}$  can be  
15 calculated for the period 21-25 August. However, the emission rates of MEK reached about  $40 \text{ nmol m}^{-2} \text{ h}^{-1}$  during this same period, suggesting a source of MEK significantly larger than the predicted uptake and reduction of atmospheric MVK. There may be different explanations for this observation. Perhaps MEK is formed by sources other than MVK or there exists a within-plant source of MVK which is further detoxified to MEK  
20 and other minor products. Within-leaf oxidation of isoprene to MVK by ROS (Jardine et al., 2012) could be such a source. Interestingly, we observed a very high linear correlation between isoprene and MEK emissions during light hours (Pearson correlation coefficient in the range 0.75-0.96 for each study period;  $p < 0.001$ ), which may indicate a link between MEK and isoprene formation leaves. Furthermore, during  $\text{H}_3\text{O}^+$  acquisition mode the



spectral peaks at  $m/z$  57.070 and  $m/z$  55.054, attributed to 2-butanol and 3-buten-2-ol, respectively, displayed a significant correlation with MEK diel emission profile (Pearson correlation coefficients 0.97,  $p < 0.001$ ; and 0.82,  $p < 0.001$ , respectively). Interference of other alcohols at  $m/z$  57.070 and  $m/z$  55.054 is possible, ~~however, GC-MS analysis of red oak volatiles did not report any potentially interfering alcohols (Helmig et al., 1999).~~ The ratio between 3-buten-2-ol emission and MEK emission was  $0.07 \pm 0.05$  (mean ratio of total daytime emissions  $\pm$  standard deviation), comparable with the corresponding ratio found in MVK fumigation experiments ( $0.05 \pm 0.02$ ), indicating the relative importance of the two enzymatic reduction pathways for MVK detoxification.

### 10 **3.4 Benzaldehyde**

Both emission and deposition of benzaldehyde by upper canopy branches was detected (Fig. ~~ure~~ 1). On average the net daily benzaldehyde exchange was positive in the period 14-25 August, with a mean daily flux of  $0.4 \text{ nmol m}^{-2} \text{ h}^{-1}$ , and negative on 25 August - 1 September, with a mean daily deposition rate of  $-1 \text{ nmol m}^{-2} \text{ h}^{-1}$  (Table 2). Emissions of up to  $2.2 \text{ nmol m}^{-2} \text{ h}^{-1}$  or  $0.23 \text{ } \mu\text{g m}^{-2} \text{ h}^{-1}$  were measured, with a peak at midday (Table 1, Fig. ~~ures~~ 1 and 5). In the last two measurement periods, however, benzaldehyde was mainly deposited, at rates up to  $-7 \text{ nmol m}^{-2} \text{ h}^{-1}$  or  $-0.7 \text{ } \mu\text{g m}^{-2} \text{ h}^{-1}$  (Table 2), and again with a clear diel cycle. Deposition rates dropped at night but were still significant. Vertical concentration profiles in July (Fig. ~~ure~~ 2) are consistent with a canopy sink and, probably, a ground source during daytime, while nighttime profiles might indicate a canopy/ground sink.

Anthropogenic sources, such as evaporation or combustion of fossil fuels, typically have been considered the main benzenoid sources in the atmosphere (Rasmussen and Khalil, 1983). It is also formed in the atmosphere through the photochemical degradation of toluene (Atkinson et al., 1980; Leone and Seinfeld, 1984) or from other precursors such as styrene and methylstyrene (Grosjean, 1985). Misztal et al. (2015) recently estimated that biogenic emissions of benzenoid compounds including benzaldehyde rival these other sources.

Benzaldehyde is an aromatic benzenoid compound naturally produced as a plant volatile (Graedel, 1978) and component of floral scents (Knudsen et al., 2006; Pichersky et al., 2006). Benzaldehyde in plants is generally synthesized from phenylalanine (Boatright et al., 2004; Dudareva et al., 2006), which is produced via the shikimate pathway (Herrmann, 1995). Emissions of benzaldehyde have been reported from *Populus tremula* L. x *tremuloides* Michx [0.05  $\mu\text{g m}^{-2} \text{h}^{-1}$ , (Misztal et al., 2015)], wheat (Batten et al., 1995), creosotebush (Jardine et al., 2010), and previously from red oaks [ca. 0.1  $\mu\text{gC gdw}^{-1} \text{h}^{-1}$ , (Helmig et al., 1999)]. Emission from plants is usually associated with stress conditions. Benzaldehyde emissions have been measured upon both abiotic (heat) and biotic (herbivore feeding) stresses (Misztal et al., 2015).

A linear relationship between benzaldehyde deposition flux and benzaldehyde concentration in the branch enclosures (Fig. 6) indicates benzaldehyde exchange is regulated according to Fick's law (Karl et al., 2010; Omasa et al., 2002). Uptake of benzaldehyde by stomata has been suggested in houseplants (Tani and Hewitt, 2009). Daytime uptake rates of benzaldehyde suggest the existence of a compensation point

(Figure 6), of around 0.02-0.025 ppbv. Further studies in controlled conditions would be needed to confirm the presence of a compensation point and to elucidate its dependence on environmental and physiological parameters. Further investigations are also required to explain why benzaldehyde is deposited. Early studies demonstrated that benzenoid compounds such as benzene and toluene may be assimilated by crop plants grown under sterile conditions via aromatic ring cleavage and successive incorporation of their carbon atoms into nonvolatile organic acids or amino acids (Durmishidze, 1975; Ugrekheldze et al., 1997; Ugrekheldze, 1976).

Figure 6 also shows that benzaldehyde emissions were detected during the first measurement period when deposition would be expected on the basis of its gas-phase mixing ratio. As mentioned, benzaldehyde emissions from leaves are typically associated with stress conditions (Misztal et al., 2015). This might have been the case, even though it was not possible to determine if a stress was the driving factor.

### 3.5 Acetaldehyde

Bidirectional exchange of acetaldehyde was observed (Fig. 1, Table 1, Table 2), with the strongest emissions (up to  $170 \text{ nmol m}^{-2} \text{ h}^{-1}$  on a leaf area basis) occurring in the middle of the day. Significant acetaldehyde deposition occurred mostly in the afternoon in the period 25-28 August, with uptake rates up to  $-40 \text{ nmol m}^{-2} \text{ h}^{-1}$ . Vertical acetaldehyde profiles from the period 25 July - 8 August show a decrease in nighttime acetaldehyde concentrations going from above canopy to below canopy (Fig. 2), suggesting a forest sink of

acetaldehyde during nighttime, although the nature of the sink deserves further investigation.

Acetaldehyde uptake by plant canopies from the atmosphere occurs primarily via stomata  
5 (Karl et al., 2005; Rottenberger et al., 2004) whereas surface deposition is minor (Jardine  
et al., 2008). Kondo et al. (1998) demonstrated that a biological sink for acetaldehyde  
should exist within plants since they are capable of continuous uptake for as long as 8h  
even under ambient acetaldehyde concentrations exceeding 200 ppbv.

10 Jardine et al. (2008) demonstrated that acetaldehyde exchange rates are controlled by  
ambient acetaldehyde concentrations, stomata resistance to acetaldehyde, and  
acetaldehyde compensation point, which suggests a plant source as well as a sink. The  
cause of acetaldehyde emissions from plants remains elusive. Acetaldehyde might be  
formed in leaves from ethanol translocated from roots, especially when anoxic conditions  
15 prevent root respiration (Kreuzwieser et al., 1999) or from cytosolic pyruvate, e.g. after  
darkening (Karl et al., 2002a) or wounding (Loreto et al., 2006). In the period of study, we  
report net acetaldehyde emission from the upper canopy branches, which may be due to  
any of these sources.

20 The measured bidirectional flux of acetaldehyde implies a compensation point in the range  
of 0-3 ppbv. During transitions from emission to uptake (e.g. on 25-28 August) the value  
was better constrained to 1-2 ppbv. The acetaldehyde compensation point seems to  
increase with increasing light intensity as might be deduced comparing light intensity,  
acetaldehyde mixing ratios and fluxes (see e.g. Fig. 1, 25-28 August). This might imply a

light control on acetaldehyde exchange in the field, in line with the findings of Jardine et al. (2008) in laboratory experiments.

### 3.6 Acetone

A great variety of plants have constitutive emissions of acetone (Bracho-Nunez et al., 2013; Isidorov et al., 1985). High acetone concentrations have been reported above several forests [e.g. (Geron et al., 2002; Helmig et al., 1998; Karl et al., 2003; Müller et al., 2006; Pöschl et al., 2001)], tree plantations ([Brilli et al., 2014b](#)) (~~Brilli et al. 2014a~~) and after ~~biomassforest~~ fires ([Brilli et al., 2014a](#)) (~~Brilli et al. 2014b~~). Red oaks also emit acetone (Steinbrecher et al., 2009). In our branch-scale measurements acetone emission reached 340 nmol m<sup>-2</sup> h<sup>-1</sup> on a leaf area basis (Table 1). A diel cycle was found with average daytime emissions of 70 nmol m<sup>-2</sup> h<sup>-1</sup>. Emission dropped at night to an average of 15 nmol m<sup>-2</sup> h<sup>-1</sup>. Similar diel patterns of acetone emissions, i.e. displaying mid-day emission maxima, have been reported in several canopy-scale experiments (Goldstein and Schade, 2000; Karl et al., 2003, 2002b; Rinne et al., 2007; Schade and Goldstein, 2001).

15

The branch-scale measurements can be scaled up to daytime average canopy-scale fluxes of about ca. 20-40 µg m<sup>-2</sup> h<sup>-1</sup> on a ground area basis. In this case, the assumptions for scaling the data to ecosystem-level fluxes were that red oak leaves emit acetone homogeneously throughout the canopy; that average LAI was = 5.2; and that all tree species in the forest emit acetone at the same rate. These values are consistent with the measurements of McKinney et al. (2011) at Harvard Forest, who observed average daytime canopy-scale acetone fluxes between 20-40 µg m<sup>-2</sup> h<sup>-1</sup> on a ground area basis in 2007 and a factor 5 higher in 2005. [The scaling of measured branch-level fluxes to canopy-](#)

level assumes that the only contribution to the flux is from tree branches, while other possible sources and sinks, such as the soil or chemistry within the canopy, are neglected. This should be kept in mind when comparing the predicted canopy-scale fluxes to the measured eddy covariance fluxes. Some insight into the possible soil contribution to fluxes is provided by the concentration vertical profile data discussed below.

Dependence of biogenic acetone emission on temperature has been consistently reported (Bracho-Nunez et al., 2013; Cojocariu et al., 2004; Grabmer et al., 2006; Janson and de Serves, 2001; Schade and Goldstein, 2001), whereas the relationships with light and stomata conductance are less clear (Bracho-Nunez et al., 2013; Cojocariu et al., 2004; Filella et al., 2009). On the other hand, relative humidity is believed to have a negative influence on acetone canopy fluxes (McKinney et al., 2011). Indications in the same direction have been found by Cojocariu et al. (2004) studying acetone emissions from *Picea abies*. The metabolic mechanisms leading to acetone release have not yet been proved. At present, no process-based model is capable of reliably describing biogenic acetone emissions. Selected plants decompose cyanogenic glucosides to generate acetone cyanohydrin, which is metabolized by a lyase to form hydrogen cyanide and acetone (Fall, 2003; Gruber et al., 2004). Decarboxylation of acetoacetate is another mechanism that has been hypothesized for acetone production (Macdonald and Fall, 1993).

McKinney et al. (2011) reported several events of negative fluxes of acetone (up to  $-50 \mu\text{g m}^{-2} \text{h}^{-1}$ ), especially at night and in the early morning. Several other studies have also reported negative acetone night fluxes at canopy scale (Karl et al., 2004, 2005). Winters et al. (2009) reported a negative correlation between emission rates and ambient

concentration that also suggests a bidirectional acetone exchange. Moreover, at leaf level Cojocariu et al. (2004) reported events of acetone uptake during darkness. In principle plant uptake of acetone is a possible explanation. There are very limited literature studies supporting this hypothesis, however. Furthermore, as pointed out by Cojocariu et al., (2004), there is no known mechanism for acetone uptake within plants. In fact, plant fumigation in controlled environments generally does not result in acetone uptake (see e.g. Omasa et al., 2002). Only transient episodes of acetone uptake were reported by Tani and Hewitt (2009) which can be explained by solubility of acetone in the water content inside the leaf, not followed by metabolization or translocation. Consistent with these results, no episodes of branch-scale acetone deposition were detected during our campaign. Furthermore, in the ancillary experiments, when upper canopy red oak branches were fumigated with acetone, no acetone uptake was detected (Table 3), despite acetone fumigation concentrations as high as ca. 70 ppbv. These results suggest negative canopy-level fluxes of acetone may be due to a mechanism other than stomatal uptake. The vertical profiles (Fig. 2) indicate nighttime acetone concentrations in the range 1-3 ppbv, with a decreasing trend from above to below canopy. As in the case of MEK, this may suggest a ground sink of acetone at night. This hypothesis should be verified in future experiments.

### 3.7 Methanol

Methanol production by vegetation is known to be related to growth and tissue repair processes. It is produced from the demethylation of membrane pectins during formation of cell walls (Fall, 2003; Fall and Benson, 1996). Long term methanol monitoring (Schade and Goldstein, 2006) shows methanol emission peaks during spring in conjunction with the rapid growing of leaves. Hence, growth rate is a key factor controlling plant methanol

emission as it strongly influences internal production rate within the plant ([Harley et al., 2007](#); [Hüve et al., 2007](#))(~~[Harley et al., 2007](#)~~). Additional drivers of methanol emissions include temperature and stomatal conductance ([Harley et al., 2007](#); [Hüve et al., 2007](#))(~~[Harley et al., 2007](#)~~). While in the case of acetaldehyde stomata exert long-term control on emission rates (Jardine et al., 2008), stomatal limitations on methanol emissions are short-term. As methanol (as well as other oVOCs) is more soluble in water than non-oxygenated VOCs, it builds up liquid foliar pools that result in a constant flux out of the leaf despite stomatal movements (Niinemets and Reichstein, 2003).

10 During the campaign, methanol emissions from red oak upper canopy branches were up to 3000 nmol m<sup>-2</sup> h<sup>-1</sup> on a leaf area basis (Table 1). Emissions peaked during the day and dropped at night to an average of 300 nmol m<sup>-2</sup> h<sup>-1</sup>. Scaling up the branch-level data (August 2014) to the ecosystem scale using the same assumptions as for acetone, the resulting daytime (10.00-15.00 h) methanol fluxes range between ca. 200-400 µg m<sup>-2</sup> h<sup>-1</sup>

15 on a ground area basis. This is in good agreement with canopy-level flux measurements in the same forest by McKinney et al. (2011), who reported daytime ecosystem-scale fluxes of ca. 100-400 µg m<sup>-2</sup> h<sup>-1</sup> on a ground area basis in July 2007 and also observed a similar diel emission pattern. Based on the branch-level experiments, the net 24-hour average methanol exchange was 650 nmol m<sup>-2</sup> h<sup>-1</sup> on a leaf area basis or 3400 nmol m<sup>-2</sup> h<sup>-1</sup> on a

20 ground area basis. At a Missouri Ozark mixed forest, Seco et al. (2015) measured a net ecosystem flux of ca. 2500 nmol m<sup>-2</sup> h<sup>-1</sup> (May through October). Laffineur et al. (2012) studied methanol exchange in the mixed forest of Vielsalm (Belgium) and found a negative average net ecosystem flux (ca. -350 nmol m<sup>-2</sup> h<sup>-1</sup>; July through October).



No methanol deposition was observed at branch-scale during the campaign. The ancillary experiments (Table 3, Fig. [ure 7](#)) show that for the same branches methanol deposition occurs when ambient concentration is rather high. Methanol compensation points in our data were ca. 15-20 ppbv at night and ca. 25-45 ppbv during the day (Fig. [ure 7](#)). However, throughout the campaign ambient methanol mixing ratios did not exceed 10 ppbv (Fig. [ure 1](#)), which explains why no uptake was observed under ambient conditions. McKinney et al. (2011) reported near zero methanol fluxes at Harvard Forest during night, although methanol uptake events were detected, often in the early morning. Vertical profiles of methanol concentrations (Fig. [ure 2](#)) are consistent with a methanol source within the canopy during daytime while at nighttime the lowest layer displays a significantly lower concentration than the upper layers. This might indicate a lower canopy/ground nighttime methanol sink.

In the fumigation experiments, methanol deposition is not transient and a compensation point is present (Fig. [ure 7](#)) suggesting the existence of a methanol degradation mechanism. Likewise, many studies have reported significant canopy-scale methanol deposition to vegetation or soil and evidence of bidirectional exchange (Wohlfahrt et al., 2012), but a holistic mechanistic explanation is lacking. Other studies suggest that methanol is taken up by stomata. For example, Gout (2000) reported stomatal uptake followed by oxidation of methanol producing formaldehyde. Given the similar uptake rates found during day and night (Fig. [ure 7](#)), this would imply that stomata were still (partially) open at night (Niinemets and Reichstein, 2003). As already mentioned, this is corroborated by the fact that the water vapour emissions remain positive at night, although lower than daytime emissions (data not shown). Another possibility is the consumption of methanol by

microorganisms that are commonly found on leaves (Holland and Polacco, 1994) and are able to degrade it via enzymatic reactions, e.g. methylotrophic bacteria (Duine and Frank, 1980). A further hypothesis is chemical transformation of methanol dissolved in water films on leaf surfaces, e.g. via reaction with OH radicals (Elliot and McCracken, 1989).

### 5 **3.8 Monoterpenes**

Although isoprene is by far the most abundant isoprenoid emitted by red oaks, monoterpene emission may also be found. In previous branch enclosure studies, Kim et al. (2011) and Helmig et al. (1999) both detected monoterpene emissions from red oaks amounting to about 1.1% of total isoprenoids, though with slightly different monoterpene  
10 compositions. In our experiment, the daytime monoterpenes/total isoprenoids ratio was in the range of 0.04-0.25% ( $\mu\text{g m}^{-2} \text{s}^{-1} / \mu\text{g m}^{-2} \text{s}^{-1}$ ), thus about an order of magnitude lower than in previous studies.

In the literature, plant species are considered to emit either isoprene or monoterpenes  
15 (Harrison et al., 2013), which indicates a possible trade-off of available carbon among isoprenoids (Dani et al., 2015). However, there are important exceptions. First, there are families that actually emit both isoprenoids, although only monoterpenes are stored in permanent pools (Loreto and Fineschi, 2015). Second, emissions of isoprene and monoterpenes in the same plants may occur at different developmental stages. In general,  
20 monoterpenes are emitted by young, expanding leaves that upon maturation produce and emit only isoprene. For example, *Picea abies* switches from emitting monoterpenes during May (Schürmann et al., 1993), to predominantly isoprene in June and sesquiterpenes in July (Hakola et al., 2003). Young leaves of several species of poplars (*Populus* sp) emit

monoterpenes before complete expansion, when isoprene emission gradually replaces monoterpenes (Brilli et al., 2009; Hakola et al., 1998). Emissions of monoterpenes by red oaks in our branch experiments may therefore indicate the presence of young, growing leaves.

5

Oaks emitting large amounts of monoterpenes have been described, and are generally evergreen species living in Mediterranean conditions (Loreto et al., 1998, 2009). These oaks do not store monoterpenes in permanent pools and therefore emit monoterpenes in an isoprene-like fashion, with similar light and temperature dependence (Loreto et al., 1996).

10

We measured daytime emission of monoterpenes with a diurnal cycle very similar to that of isoprene (Fig. ~~ure~~ 1), and a highly significant correlation is present between daytime isoprene and monoterpene emissions (Pearson correlation coefficient 0.88,  $p < 0.05$ ). This suggests *de novo* monoterpene biosynthesis (Loreto et al., 1996), also in a predominantly monoterpene-emitting temperate oak. However, in our experiment monoterpene emissions

15 were also detected during nighttime (Table 1 and Table 2), with average rates of 2-20  $\text{nmol m}^{-2} \text{h}^{-1}$ , suggesting at least some emission from stored pools.

20

Finally, monoterpene deposition was found on only one out of the three branches sampled (Table 2). By analogy with the much larger emissions of isoprene where deposition was not observed, it may be suggested that monoterpene deposition may be rare or absent.

#### 4 Conclusions

The observations presented herein provide new information about the bidirectional exchange of oVOCs between forest plants and the atmosphere. In the predominantly

isoprene-emitting red oaks that were the subject of our investigation, we found a link between exchanges of MVK and MEK, which provides a new framework for the understanding of MEK exchange, based on a possible in-plant source from isoprene oxidation products. This link supports the hypothesis of plant stress defense by isoprene via reaction with ROS. Production of MEK in excess of MVK uptake and in correlation with isoprene emission suggests within-plant oxidation of isoprene to MVK followed by detoxification and the eventual release of volatile products such as MEK, 3-buten-2-ol and 2-butanol. Further studies are needed to confirm this link. We also found small emissions of monoterpenes, which might be a marker of juvenility in the canopy. We report bidirectional exchange of benzaldehyde between biosphere and the atmosphere, describing a so far unknown (to our knowledge) foliar deposition of benzenoid compounds. More investigations on benzenoid bidirectional exchange are needed to improve global budgets of the biogenic and anthropogenic sources of these volatiles. Emissions and fluxes of other important oVOCs such as acetaldehyde, methanol and acetone have been confirmed.

## 15 **Data availability**

The full dataset is available from the authors upon request (email). Data will also be available on the Harvard Forest archive.

*Author contributions.* L. Cappellin and K. McKinney designed this research; field work was carried out by L. Cappellin, A. Algarra Alarcon, I. Herdinger-Blatt and K. McKinney. Laboratory analyses were performed by A. Algarra Alarcon and L. Cappellin. L. Cappellin, F. Biasioli, S. Martin, F. Loreto and K. McKinney wrote the paper.

*Competing interests.* The authors declare that they have no conflict of interest.

*Acknowledgements.* Luca Cappellin acknowledges funding from H2020-EU.1.3.2 (grant agreement n. 659315). The authors thank Evan Goldman and J. William Munger for providing LAI data and Mark Vanscoy for providing meteorological data and for managing the measurement site.

## References

- 10 [Amelynck, C., Schoon, N., Kuppens, T., Bultinck, P. and Arijs, E.: A selected ion flow tube study of the reactions of H<sub>3</sub>O<sup>+</sup>, NO<sup>+</sup> and O<sub>2</sub><sup>+</sup> with some oxygenated biogenic volatile organic compounds, Int. J. Mass Spectrom., 247\(1–3\), 1–9, doi:10.1016/j.ijms.2005.08.010, 2005.](#)
- 15 [Andreae, M. O., Artaxo, P., Brandão, C., Carswell, F. E., Ciccioli, P., da Costa, A. L., Culf, A. D., Esteves, J. L., Gash, J. H. C., Grace, J., Kabat, P., Lelieveld, J., Malhi, Y., Manzi, A. O., Meixner, F. X., Nobre, A. D., Nobre, C., Ruiivo, M. d. L. P., Silva-Dias, M. A., Stefani, P., Valentini, R., von Jouanne, J. and Waterloo, M. J.: Biogeochemical cycling of carbon, water, energy, trace gases, and aerosols in Amazonia: The LBA-EUSTACH experiments, J. Geophys. Res. Atmospheres, 107\(D20\), 8066, doi:10.1029/2001JD000524, 2002.](#)
- [Atkinson, R.: Atmospheric chemistry of VOCs and NO<sub>x</sub>, Atmos. Environ., 34\(12–14\), 2063–2101, doi:10.1016/S1352-2310\(99\)00460-4, 2000.](#)
- 20 [Atkinson, R. and Arey, J.: Atmospheric Chemistry of Biogenic Organic Compounds, Acc. Chem. Res., 31\(9\), 574–583, doi:10.1021/ar970143z, 1998.](#)
- [Atkinson, R., Carter, W. P. L., Darnall, K. R., Winer, A. M. and Pitts, J. N.: A smog chamber and modeling study of the gas phase NO<sub>x</sub>–air photooxidation of toluene and the cresols, Int. J. Chem. Kinet., 12\(11\), 779–836, doi:10.1002/kin.550121102, 1980.](#)
- 25 [Baeza Romero, M. T., Blitz, M. A., Heard, D. E., Pilling, M. J., Price, B., Seakins, P. W. and Wang, L.: Photolysis of methylethyl, diethyl and methylvinyl ketones and their role in the atmospheric HO<sub>x</sub> budget, Faraday Discuss., 130\(0\), 73–88, doi:10.1039/B419160A, 2005.](#)
- [Batten, J. H., Stutte, G. W. and Wheeler, R. M.: Effect of crop development on biogenic emissions from plant populations grown in closed plant growth chambers, Phytochemistry, 39\(6\), 1351–1357, 1995.](#)
- 30 [Benkovitz, C. M., Schwartz, S. E., Jensen, M. P., Miller, M. A., Easter, R. C. and Bates, T. S.: Modeling atmospheric sulfur over the Northern Hemisphere during the Aerosol Characterization Experiment 2 experimental period, J. Geophys. Res. Atmospheres, 109\(D22\), D22207, doi:10.1029/2004JD004939, 2004.](#)

- Blake, R., Monks, P. and Ellis, A.: Proton-Transfer Reaction Mass Spectrometry, *Chem. Rev.*, 109(3), 861–896, doi:10.1021/cr800364q, 2009.
- Boatright, J., Negre, F., Chen, X., Kish, C. M., Wood, B., Peel, G., Orlova, I., Gang, D., Rhodes, D. and Dudareva, N.: Understanding in Vivo Benzenoid Metabolism in Petunia Petal Tissue, *Plant Physiol.*, 135(4), 1993–2011, doi:10.1104/pp.104.045468, 2004.
- Boose, E.: Fisher Meteorological Station at Harvard Forest since 2001., *Harv. For. Data Arch.* HF001, 2001.
- Bouchoux, G., Salpin, J. Y. and Leblanc, D.: A relationship between the kinetics and thermochemistry of proton transfer reactions in the gas phase, *Int. J. MASS Spectrom. ION Process.*, 153(1), 37–48, 1996.
- Bouvier-Brown, N. C., Goldstein, A. H., Worton, D. R., Matross, D. M., Gilman, J. B., Kuster, W. C., Welsh-Bon, D., Warneke, C., de Gouw, J. A., Cahill, T. M. and Holzinger, R.: Methyl chavicol: characterization of its biogenic emission rate, abundance, and oxidation products in the atmosphere, *Atmos Chem Phys*, 9(6), 2061–2074, doi:10.5194/acp-9-2061-2009, 2009.
- Bracho-Nunez, A., Knothe, N. M., Welter, S., Staudt, M., Costa, W. R., Liberato, M. A. R., Piedade, M. T. F. and Kesselmeier, J.: Leaf level emissions of volatile organic compounds (VOC) from some Amazonian and Mediterranean plants, *Biogeosciences*, 10(9), 5855–5873, doi:10.5194/bg-10-5855-2013, 2013.
- Brilli, F., Cicciooli, P., Frattoni, M., Prestininzi, M., Spanedda, A. F. and Loreto, F.: Constitutive and herbivore-induced monoterpenes emitted by *Populus x euroamericana* leaves are key volatiles that orient *Chrysomela populi* beetles, *Plant Cell Environ.*, 32(5), 542–552, doi:10.1111/j.1365-3040.2009.01948.x, 2009.
- Brilli, F., Gioli, B., Cicciooli, P., Zona, D., Loreto, F., Janssens, I. A. and Ceulemans, R.: Proton Transfer Reaction Time-of-Flight Mass Spectrometric (PTR-TOF-MS) determination of volatile organic compounds (VOCs) emitted from a biomass fire developed under stable nocturnal conditions, *Atmos. Environ.*, 97, 54–67, doi:10.1016/j.atmosenv.2014.08.007, 2014a.
- Brilli, F., Gioli, B., Zona, D., Pallozzi, E., Zenone, T., Fratini, G., Calfapietra, C., Loreto, F., Janssens, I. A. and Ceulemans, R.: Simultaneous leaf- and ecosystem-level fluxes of volatile organic compounds from a poplar-based SRC plantation, *Agric. For. Meteorol.*, 187, 22–35, doi:10.1016/j.agrformet.2013.11.006, 2014b.
- Brilli, F., Gioli, B., Fares, S., Terenzio, Z., Zona, D., Gielen, B., Loreto, F., Janssens, I. A. and Ceulemans, R.: Rapid leaf development drives the seasonal pattern of volatile organic compound (VOC) fluxes in a “coppiced” bioenergy poplar plantation, *Plant Cell Environ.*, 39(3), 539–555, doi:10.1111/pce.12638, 2016.
- Cappellin, L., Biasioli, F., Fabris, A., Schuhfried, E., Soukoulis, C., Mark, T. and Gasperi, F.: Improved mass accuracy in PTR-TOF-MS: Another step towards better compound identification in PTR-MS, *Int. J. Mass Spectrom.*, 290(1), 60–63, doi:10.1016/j.ijms.2009.11.007, 2010.
- Cappellin, L., Biasioli, F., Schuhfried, E., Soukoulis, C., Märk, T. D. and Gasperi, F.: Extending the dynamic range of proton transfer reaction time-of-flight mass spectrometers by a novel dead time correction, *Rapid Commun. Mass Spectrom. RCM*, 25(1), 179–183, doi:10.1002/rcm.4819, 2011a.
- Cappellin, L., Biasioli, F., Granitto, P. M., Schuhfried, E., Soukoulis, C., Costa, F., Märk, T. D. and Gasperi, F.: On data analysis in PTR-TOF-MS: From raw spectra to data mining, *Sens. Actuators B Chem.*, 155(1), 183–190, doi:10.1016/j.snb.2010.11.044, 2011b.

- Cappellin, L., Karl, T., Probst, M., Ismailova, O., Winkler, P. M., Soukoulis, C., Aprea, E., Märk, T. D., Gasperi, F. and Biasoli, F.: On Quantitative Determination of Volatile Organic Compound Concentrations Using Proton Transfer Reaction Time-of-Flight Mass Spectrometry, *Env. Sci Technol.*, 46(4), 2283–2290, doi:10.1021/es203985t, 2012.
- 5 Carlton, A. G., Wiedinmyer, C. and Kroll, J. H.: A review of Secondary Organic Aerosol (SOA) formation from isoprene, *Atmos Chem Phys*, 9(14), 4987–5005, doi:10.5194/acp-9-4987-2009, 2009.
- Claeys, M., Graham, B., Vas, G., Wang, W., Vermeylen, R., Pashynska, V., Cafmeyer, J., Guyon, P., Andreae, M. O., Artaxo, P. and Maenhaut, W.: Formation of Secondary Organic Aerosols Through Photooxidation of Isoprene, *Science*, 303(5661), 1173–1176, doi:10.1126/science.1092805, 2004.
- 10 Cojocariu, C., Kreuzwieser, J. and Rennenberg, H.: Correlation of short-chained carbonyls emitted from Picea abies with physiological and environmental parameters, *New Phytol.*, 162(3), 717–727, doi:10.1111/j.1469-8137.2004.01061.x, 2004.
- Dani, K. G. S., Fineschi, S. and Loreto, F.: Biogenic Volatile Isoprenoid Emission and Levels of Natural Selection, *J. Indian Inst. Sci.*, 95(1), 1–14, 2015.
- Dudareva, N., Negre, F., Nagegowda, D. A. and Orlova, I.: Plant Volatiles: Recent Advances and Future Perspectives, *Crit. Rev. Plant Sci.*, 25(5), 417–440, doi:10.1080/07352680600899973, 2006.
- 15 Duine, J. A. and Frank, J.: The prosthetic group of methanol dehydrogenase. Purification and some of its properties, *Biochem. J.*, 187(1), 221–226, 1980.
- Durmishidze, S. V.: Cleavage of the Aromatic Ring of Some Exogenous Compounds in Plants, *Metsniereba, Tbilisi.*, 1975.
- Ebata, T., Anezaki, Y., Fujii, M., Mikami, N. and Ito, M.: High Rydberg states of nitric oxide studied by two-color multiphoton spectroscopy, *J. Phys. Chem.*, 87(24), 4773–4776, doi:10.1021/j150642a001, 1983.
- 20 Elliot, A. J. and McCracken, D. R.: Effect of temperature on O<sub>2</sub> reactions and equilibria: A pulse radiolysis study, *Int. J. Radiat. Appl. Instrum. Part C Radiat. Phys. Chem.*, 33(1), 69–74, doi:10.1016/1359-0197(89)90096-9, 1989.
- Fall, R.: Abundant oxygenates in the atmosphere: a biochemical perspective, *Chem. Rev.*, 103(12), 4941–4952, doi:10.1021/cr0206521, 2003.
- 25 Fall, R. and Benson, A. A.: Leaf methanol — the simplest natural product from plants, *Trends Plant Sci.*, 1(9), 296–301, doi:10.1016/S1360-1385(96)88175-0, 1996.
- Fares, S., Paoletti, E., Loreto, F. and Brilli, F.: Bidirectional Flux of Methyl Vinyl Ketone and Methacrolein in Trees with Different Isoprenoid Emission under Realistic Ambient Concentrations, *Environ. Sci. Technol.*, 49(13), 7735–7742, doi:10.1021/acs.est.5b00673, 2015.
- 30 Filella, I., Peñuelas, J. and Seco, R.: Short-chained oxygenated VOC emissions in Pinus halepensis in response to changes in water availability, *Acta Physiol. Plant.*, 31(2), 311–318, doi:10.1007/s11738-008-0235-6, 2009.
- French, E. C.: The Electrochemical Reduction of Methyl Vinyl Ketone in Aqueous Solutions, North Texas State University., 1970.
- Galbally, I. E. and Kirstine, W.: The Production of Methanol by Flowering Plants and the Global Cycle of Methanol, *J. Atmospheric Chem.*, 43(3), 195–229, doi:10.1023/A:1020684815474, 2002.

- Geron, C., Guenther, A., Greenberg, J., Loescher, H. W., Clark, D. and Baker, B.: Biogenic volatile organic compound emissions from a lowland tropical wet forest in Costa Rica, Atmos. Environ., 36(23), 3793–3802, doi:10.1016/S1352-2310(02)00301-1, 2002.
- 5 Goldstein, A. H. and Galbally, I. E.: Known and Unexplored Organic Constituents in the Earth's Atmosphere, Environ. Sci. Technol., 41(5), 1514–1521, doi:10.1021/es072476p, 2007.
- Goldstein, A. H. and Schade, G. W.: Quantifying biogenic and anthropogenic contributions to acetone mixing ratios in a rural environment, Atmos. Environ., 34(29–30), 4997–5006, doi:10.1016/S1352-2310(00)00321-6, 2000.
- Gout, E.: Metabolism of Methanol in Plant Cells. Carbon-13 Nuclear Magnetic Resonance Studies, PLANT Physiol., 123(1), 287–296, doi:10.1104/pp.123.1.287, 2000.
- 10 de Gouw, J. A., Howard, C. J., Custer, T. G. and Fall, R.: Emissions of volatile organic compounds from cut grass and clover are enhanced during the drying process, Geophys. Res. Lett., 26(7), 811–814, doi:10.1029/1999GL900076, 1999.
- 15 de Gouw, J. A., Warneke, C., Stohl, A., Wollny, A. G., Brock, C. A., Cooper, O. R., Holloway, J. S., Trainer, M., Fehsenfeld, F. C., Atlas, E. L., Donnelly, S. G., Stroud, V. and Lueb, A.: Volatile organic compounds composition of merged and aged forest fire plumes from Alaska and western Canada, J. Geophys. Res. Atmospheres, 111(D10), D10303, doi:10.1029/2005JD006175, 2006.
- de Gouw, J. and Warneke, C.: Measurements of volatile organic compounds in the earths atmosphere using proton-transfer-reaction mass spectrometry, Mass Spectrom. Rev., 26(2), 223–257, doi:10.1002/mas.20119, 2007.
- de Gouw, J., Warneke, C., Karl, T., Eerdeken, G., van der Veen, C. and Fall, R.: Sensitivity and specificity of atmospheric trace gas detection by proton-transfer-reaction mass spectrometry, Int. J. Mass Spectrom., 223(1–3), 365–382, 2003.
- 20 Grabmer, W., Kreuzwieser, J., Wisthaler, A., Cojocariu, C., Graus, M., Rennenberg, H., Steigner, D., Steinbrecher, R. and Hansel, A.: VOC emissions from Norway spruce (*Picea abies* L. [Karst]) twigs in the field—Results of a dynamic enclosure study, Atmos. Environ., 40, Supplement 1, 128–137, doi:10.1016/j.atmosenv.2006.03.043, 2006.
- Graedel, T. E.: Chemical compounds in the atmosphere, Academic Press, New York., 1978.
- 25 Griffin, R. J., Cocker, D. R., Flagan, R. C. and Seinfeld, J. H.: Organic aerosol formation from the oxidation of biogenic hydrocarbons, J. Geophys. Res. Atmospheres, 104(D3), 3555–3567, doi:10.1029/1998JD100049, 1999.
- Grosjean, D.: Atmospheric reactions of styrenes and peroxybenzoyl nitrate, Sci. Total Environ., 46(1–4), 41–59, doi:10.1016/0048-9697(85)90282-7, 1985.
- 30 Gruber, K., Gartler, G., Krammer, B., Schwab, H. and Kratky, C.: Reaction mechanism of hydroxynitrile lyases of the alpha/beta-hydrolase superfamily: the three-dimensional structure of the transient enzyme-substrate complex certifies the crucial role of LYS236, J. Biol. Chem., 279(19), 20501–20510, doi:10.1074/jbc.M401575200, 2004.
- Guenther, A.: The contribution of reactive carbon emissions from vegetation to the carbon balance of terrestrial ecosystems, Chemosphere, 49(8), 837–844, doi:10.1016/S0045-6535(02)00384-3, 2002.
- 35 Guenther, A., Hewitt, C. N., Erickson, D., Fall, R., Geron, C., Graedel, T., Harley, P., Klinger, L., Lerdau, M., Mckay, W. A., Pierce, T., Scholes, B., Steinbrecher, R., Tallamraju, R., Taylor, J. and Zimmerman, P.: A global model of natural volatile organic compound emissions, J. Geophys. Res. Atmospheres, 100(D5), 8873–8892, doi:10.1029/94JD02950, 1995.



- Guenther, A., Karl, T., Harley, P., Wiedinmyer, C., Palmer, P. I. and Geron, C.: Estimates of global terrestrial isoprene emissions using MEGAN (Model of Emissions of Gases and Aerosols from Nature), *Atmos Chem Phys*, 6(11), 3181–3210, doi:10.5194/acp-6-3181-2006, 2006.
- 5 Hakola, H., Rinne, J. and Laurila, T.: The hydrocarbon emission rates of tea-leaved willow (*Salix phylicifolia*), silver birch (*Betula pendula*) and European aspen (*Populus tremula*), *Atmos. Environ.*, 32(10), 1825–1833, doi:10.1016/S1352-2310(97)00482-2, 1998.
- Hakola, H., Tarvainen, V., Laurila, T., Hiltunen, V., Hellén, H. and Keronen, P.: Seasonal variation of VOC concentrations above a boreal coniferous forest, *Atmos. Environ.*, 37(12), 1623–1634, doi:10.1016/S1352-2310(03)00014-1, 2003.
- 10 Harley, P., Fridd-Stroud, V., Greenberg, J., Guenther, A. and Vasconcellos, P.: Emission of 2-methyl-3-buten-2-ol by pines: A potentially large natural source of reactive carbon to the atmosphere, *J. Geophys. Res. Atmospheres*, 103(D19), 25479–25486, doi:10.1029/98JD00820, 1998.
- Harley, P., Greenberg, J., Niinemets, Ü. and Guenther, A.: Environmental controls over methanol emission from leaves, *Biogeosciences*, 4(6), 1083–1099, doi:10.5194/bg-4-1083-2007, 2007.
- 15 Harrison, S. P., Morfopoulos, C., Dani, K. G. S., Prentice, I. C., Arneth, A., Atwell, B. J., Barkley, M. P., Leishman, M. R., Loreto, F., Medlyn, B. E., Niinemets, Ü., Possell, M., Peñuelas, J. and Wright, I. J.: Volatile isoprenoid emissions from plastid to planet, *New Phytol.*, 197(1), 49–57, doi:10.1111/nph.12021, 2013.
- Heiden, A. C., Kobel, K., Komenda, M., Koppmann, R., Shao, M. and Wildt, J.: Toluene emissions from plants, *Geophys. Res. Lett.*, 26(9), 1283–1286, doi:10.1029/1999GL900220, 1999.
- 20 Helmig, D., Balsley, B., Davis, K., Kuck, L. R., Jensen, M., Bognar, J., Smith, T., Arrieta, R. V., Rodríguez, R. and Birks, J. W.: Vertical profiling and determination of landscape fluxes of biogenic nonmethane hydrocarbons within the planetary boundary layer in the Peruvian Amazon, *J. Geophys. Res. Atmospheres*, 103(D19), 25519–25532, doi:10.1029/98JD01023, 1998.
- 25 Helmig, D., Klinger, L. F., Guenther, A., Vierling, L., Geron, C. and Zimmerman, P.: Biogenic volatile organic compound emissions (BVOCs) I. Identifications from three continental sites in the U.S., *Chemosphere*, 38(9), 2163–2187, doi:10.1016/S0045-6535(98)00425-1, 1999.
- Helmig, D., Ortega, J., Guenther, A., Herrick, J. D. and Geron, C.: Sesquiterpene emissions from loblolly pine and their potential contribution to biogenic aerosol formation in the Southeastern US, *Atmos. Environ.*, 40(22), 4150–4157, doi:10.1016/j.atmosenv.2006.02.035, 2006.
- 30 Herrmann, K.: The Shikimate Pathway: Early Steps in the Biosynthesis of Aromatic Compounds., *Plant Cell*, 7(7), 907–919, 1995.
- Holland, M. A. and Polacco, and J. C.: PPFMs and Other Covert Contaminants: Is There More to Plant Physiology Than Just Plant?, *Annu. Rev. Plant Physiol. Plant Mol. Biol.*, 45(1), 197–209, doi:10.1146/annurev.pp.45.060194.001213, 1994.
- 35 Holzinger, R., Sandoval-Soto, L., Rottenberger, S., Crutzen, P. J. and Kesselmeier, J.: Emissions of volatile organic compounds from *Quercus ilex* L. measured by Proton Transfer Reaction Mass Spectrometry under different environmental conditions, *J. Geophys. Res. Atmospheres*, 105(D16), 20573–20579, doi:10.1029/2000JD900296, 2000.

- Hüve, K., Christ, M. M., Kleist, E., Uerlings, R., Niinemets, Ü., Walter, A. and Wildt, J.: Simultaneous growth and emission measurements demonstrate an interactive control of methanol release by leaf expansion and stomata, *J. Exp. Bot.*, 58(7), 1783–1793, doi:10.1093/jxb/erm038, 2007.
- 5 Isidorov, V. A., Zenkevich, I. G. and Ioffe, B. V.: Volatile organic compounds in the atmosphere of forests, *Atmospheric Environ.* 1967, 19(1), 1–8, doi:10.1016/0004-6981(85)90131-3, 1985.
- Jacob, D. J., Field, B. D., Jin, E. M., Bey, I., Li, Q., Logan, J. A., Yantosca, R. M. and Singh, H. B.: Atmospheric budget of acetone, *J. Geophys. Res. Atmospheres*, 107(D10), ACH 5-1-ACH 5-17, doi:10.1029/2001JD000694, 2002.
- Janson, R. and de Serves, C.: Acetone and monoterpene emissions from the boreal forest in northern Europe, *Atmos. Environ.*, 35(27), 4629–4637, doi:10.1016/S1352-2310(01)00160-1, 2001.
- 10 Jardine, K., Harley, P., Karl, T., Guenther, A., Lerdau, M. and Mak, J. E.: Plant physiological and environmental controls over the exchange of acetaldehyde between forest canopies and the atmosphere, *Biogeosciences*, 5(6), 1559–1572, doi:10.5194/bg-5-1559-2008, 2008.
- Jardine, K., Abrell, L., Kurc, S. A., Huxman, T., Ortega, J. and Guenther, A.: Volatile organic compound emissions from *Larrea tridentata* (creosotebush), *Atmos Chem Phys*, 10(24), 12191–12206, doi:10.5194/acp-10-12191-2010, 2010.
- 15 Jardine, K. J., Monson, R. K., Abrell, L., Saleska, S. R., Arneeth, A., Jardine, A., Ishida, F. Y., Serrano, A. M. Y., Artaxo, P., Karl, T., Fares, S., Goldstein, A., Loreto, F. and Huxman, T.: Within-plant isoprene oxidation confirmed by direct emissions of oxidation products methyl vinyl ketone and methacrolein, *Glob. Change Biol.*, 18(3), 973–984, doi:10.1111/j.1365-2486.2011.02610.x, 2012.
- 20 Jordan, A., Haidacher, S., Hanel, G., Hartungen, E., Herbig, J., Märk, L., Schottkowsky, R., Seehauser, H., Sulzer, P. and Märk, T. D.: An online ultra-high sensitivity Proton-transfer-reaction mass-spectrometer combined with switchable reagent ion capability (PTR + SRI – MS), *Int. J. Mass Spectrom.*, 286(1), 32–38, doi:10.1016/j.ijms.2009.06.006, 2009.
- 25 Kalogridis, C., Gros, V., Sarda-Estève, R., Langford, B., Loubet, B., Bonsang, B., Bonnaire, N., Nemitz, E., Genard, A.-C., Boissard, C., Fernandez, C., Ormeño, E., Baisnée, D., Reiter, I. and Lathièrre, J.: Concentrations and fluxes of isoprene and oxygenated VOCs at a French Mediterranean oak forest, *Atmos Chem Phys*, 14(18), 10085–10102, doi:10.5194/acp-14-10085-2014, 2014.
- Kanakidou, M., Seinfeld, J. H., Pandis, S. N., Barnes, I., Dentener, F. J., Facchini, M. C., Van Dingenen, R., Ervens, B., Nenes, A., Nielsen, C. J., Swietlicki, E., Putaud, J. P., Balkanski, Y., Fuzzi, S., Horth, J., Moortgat, G. K., Winterhalter, R., Myhre, C. E. L., Tsigaridis, K., Vignati, E., Stephanou, E. G. and Wilson, J.: Organic aerosol and global climate modelling: a review, *Atmospheric Chem. Phys.*, 5(4), 1053–1123, doi:10.5194/acp-5-1053-2005, 2005.
- 30 Karl, T., Curtis, A. J., Rosenstiel, T. N., Monson, R. K. and Fall, R.: Transient releases of acetaldehyde from tree leaves – products of a pyruvate overflow mechanism?, *Plant Cell Environ.*, 25(9), 1121–1131, doi:10.1046/j.1365-3040.2002.00889.x, 2002a.
- Karl, T., Guenther, A., Spirig, C., Hansel, A. and Fall, R.: Seasonal variation of biogenic VOC emissions above a mixed hardwood forest in northern Michigan, *Geophys. Res. Lett.*, 30(23), 2186, doi:10.1029/2003GL018432, 2003.
- 35 Karl, T., Potosnak, M., Guenther, A., Clark, D., Walker, J., Herrick, J. D. and Geron, C.: Exchange processes of volatile organic compounds above a tropical rain forest: Implications for modeling tropospheric chemistry above dense vegetation, *J. Geophys. Res. Atmospheres*, 109(D18), D18306, doi:10.1029/2004JD004738, 2004.

- Karl, T., Harley, P., Guenther, A., Rasmussen, R., Baker, B., Jardine, K. and Nemitz, E.: The bi-directional exchange of oxygenated VOCs between a loblolly pine (*Pinus taeda*) plantation and the atmosphere, *Atmos Chem Phys*, 5(11), 3015–3031, doi:10.5194/acp-5-3015-2005, 2005.
- 5 Karl, T., Harley, P., Emmons, L., Thornton, B., Guenther, A., Basu, C., Turnipseed, A. and Jardine, K.: Efficient Atmospheric Cleansing of Oxidized Organic Trace Gases by Vegetation, *Science*, 330(6005), 816–819, doi:10.1126/science.1192534, 2010.
- Karl, T., Hansel, A., Cappellin, L., Kaser, L., Herdlinger-Blatt, I. and Jud, W.: Selective measurements of isoprene and 2-methyl-3-buten-2-ol based on NO<sup>+</sup> ionization mass spectrometry, *Atmos Chem Phys*, 12(24), 11877–11884, doi:10.5194/acp-12-11877-2012, 2012.
- 10 Karl, T. G., Spirig, C., Rinne, J., Stroud, C., Prevost, P., Greenberg, J., Fall, R. and Guenther, A.: Virtual disjunct eddy covariance measurements of organic compound fluxes from a subalpine forest using proton transfer reaction mass spectrometry, *Atmos Chem Phys*, 2(4), 279–291, doi:10.5194/acp-2-279-2002, 2002b.
- Kavouras, I. G., Mihalopoulos, N. and Stephanou, E. G.: Formation of atmospheric particles from organic acids produced by forests, *Nature*, 395(6703), 683–686, doi:10.1038/27179, 1998.
- 15 Kergomard, A., Renard, M. F., Veschambre, H., Courtois, D. and Petiard, V.: Reduction of  $\alpha,\beta$ -unsaturated ketones by plant suspension cultures, *Phytochemistry*, 27(2), 407–409, doi:10.1016/0031-9422(88)83108-X, 1988.
- Kim, S., Karl, T., Guenther, A., Tyndall, G., Orlando, J., Harley, P., Rasmussen, R. and Apel, E.: Emissions and ambient distributions of Biogenic Volatile Organic Compounds (BVOC) in a ponderosa pine ecosystem: interpretation of PTR-MS mass spectra, *Atmos Chem Phys*, 10(4), 1759–1771, doi:10.5194/acp-10-1759-2010, 2010.
- 20 Kim, S., Guenther, A., Karl, T. and Greenberg, J.: Contributions of primary and secondary biogenic VOC total OH reactivity during the CABINEX (Community Atmosphere-Biosphere INteractions Experiments)-09 field campaign, *Atmospheric Chem. Phys.*, 11(16), 8613–8623, doi:10.5194/acp-11-8613-2011, 2011.
- Kirch, H.-H., Bartels, D., Wei, Y., Schnable, P. S. and Wood, A. J.: The ALDH gene superfamily of Arabidopsis, *Trends Plant Sci.*, 9(8), 371–377, doi:10.1016/j.tplants.2004.06.004, 2004.
- 25 Kirstine, W., Galbally, I., Ye, Y. and Hooper, M.: Emissions of volatile organic compounds (primarily oxygenated species) from pasture, *J. Geophys. Res. Atmospheres*, 103(D9), 10605–10619, doi:10.1029/97JD03753, 1998.
- Knighton, W. B., Fortner, E. C., Herndon, S. C., Wood, E. C. and Miake-Lye, R. C.: Adaptation of a proton transfer reaction mass spectrometer instrument to employ NO<sup>+</sup> as reagent ion for the detection of 1,3-butadiene in the ambient atmosphere, *Rapid Commun. Mass Spectrom.* RCM, 23(20), 3301–3308, doi:10.1002/rcm.4249, 2009.
- 30 Knudsen, J. T., Eriksson, R., Gershenson, J. and Ståhl, B.: Diversity and distribution of floral scent, *Bot. Rev.*, 72(1), 1, doi:10.1663/0006-8101(2006)72[1:DADOF5]2.0.CO;2, 2006.
- Kondo, T., Hasegawa, K., Kitagawa, C., Uchida, R. and Onishi, M.: Absorption of Atmospheric Phenol by Evergreen Broad-leaved Tree Species., *Chem. Lett.*, (11), 997–998, doi:10.1246/cl.1996.997, 1996.
- Kondo, T., Hasegawa, K., Uchida, R. and Onishi, M.: Absorption of atmospheric C<sub>2</sub>–C<sub>5</sub> aldehydes by various tree species and their tolerance to C<sub>2</sub>–C<sub>5</sub> aldehydes, *Sci. Total Environ.*, 224(1–3), 121–132, doi:10.1016/S0048-9697(98)00320-9, 1998.
- 35 Kreuzwieser, J., Scheerer, U. and Rennenberg, H.: Metabolic origin of acetaldehyde emitted by poplar (*Populus tremula* × *P. alba*) trees, *J. Exp. Bot.*, 50(335), 757–765, doi:10.1093/jxb/50.335.757, 1999.

- Laffineur, O., Aubinet, M., Schoon, N., Amelynck, C., Müller, J.-F., Dewulf, J., Van Langenhove, H., Steppe, K. and Heinesch, B.: Abiotic and biotic control of methanol exchanges in a temperate mixed forest, *Atmos Chem Phys*, 12(1), 577–590, doi:10.5194/acp-12-577-2012, 2012.
- 5 Leone, J. A. and Seinfeld, J. H.: Updated chemical mechanism for atmospheric photooxidation of toluene, *Int. J. Chem. Kinet.*, 16(2), 159–193, doi:10.1002/kin.550160207, 1984.
- Liu, Y.: Isoprene Photooxidation via the Hydroperoxyl Pathway, Doctoral dissertation, Harvard University, Graduate School of Arts & Sciences, 23 January. [online] Available from: <https://dash.harvard.edu/handle/1/14226050> (Accessed 29 January 2016), 2015.
- 10 Liu, Y., Brito, J., Dorris, M. R., Rivera-Rios, J. C., Seco, R., Bates, K. H., Artaxo, P., Duvoisin, S., Keutsch, F. N., Kim, S., Goldstein, A. H., Guenther, A. B., Manzi, A. O., Souza, R. A. F., Springston, S. R., Watson, T. B., McKinney, K. A. and Martin, S. T.: Isoprene photochemistry over the Amazon rainforest, *Proc. Natl. Acad. Sci.*, 113(22), 6125–6130, doi:10.1073/pnas.1524136113, 2016.
- 15 Liu, Y. J., Herdlinger-Blatt, I., McKinney, K. A. and Martin, S. T.: Production of methyl vinyl ketone and methacrolein via the hydroperoxyl pathway of isoprene oxidation, *Atmos Chem Phys*, 13(11), 5715–5730, doi:10.5194/acp-13-5715-2013, 2013.
- Loreto, F. and Fineschi, S.: Reconciling functions and evolution of isoprene emission in higher plants, *New Phytol.*, 206(2), 578–582, doi:10.1111/nph.13242, 2015.
- Loreto, F. and Sharkey, T. D.: A gas-exchange study of photosynthesis and isoprene emission in *Quercus rubra*, *Planta*, 182(4), 523–531, doi:10.1007/BF02341027, 1990.
- 20 Loreto, F., Ciccioli, P., Cecinato, A., Brancaleoni, E., Frattoni, M., Fabozzi, C. and Tricoli, D.: Evidence of the Photosynthetic Origin of Monoterpenes Emitted by *Quercus ilex* L. Leaves by  $^{13}\text{C}$  Labeling., *Plant Physiol.*, 110(4), 1317–1322, 1996.
- Loreto, F., Ciccioli, P., Brancaleoni, E., Cecinato, A. and Frattoni, M.: Measurement of isoprenoid content in leaves of Mediterranean *Quercus* spp. by a novel and sensitive method and estimation of the isoprenoid partition between liquid and gas phase inside the leaves, *Plant Sci.*, 136(1), 25–30, doi:10.1016/S0168-9452(98)00092-2, 1998.
- 25 Loreto, F., Barta, C., Brilli, F. and Nogues, I.: On the induction of volatile organic compound emissions by plants as consequence of wounding or fluctuations of light and temperature, *Plant Cell Environ.*, 29(9), 1820–1828, doi:10.1111/j.1365-3040.2006.01561.x, 2006.
- Loreto, F., Bagnoli, F. and Fineschi, S.: One species, many terpenes: matching chemical and biological diversity, *Trends Plant Sci.*, 14(8), 416–420, doi:10.1016/j.tplants.2009.06.003, 2009.
- 30 Macdonald, R. C. and Fall, R.: Acetone emission from conifer buds, *Phytochemistry*, 34(4), 991–994, doi:10.1016/S0031-9422(00)90700-3, 1993.
- MacDonald, R. C. and Kimmerer, T. W.: Metabolism of Transpired Ethanol by Eastern Cottonwood (*Populus deltoides* Bartr.), *Plant Physiol.*, 102(1), 173–179, 1993.
- 35 McKinney, K. A., Lee, B. H., Vasta, A., Pho, T. V. and Munger, J. W.: Emissions of isoprenoids and oxygenated biogenic volatile organic compounds from a New England mixed forest, *Atmos Chem Phys*, 11(10), 4807–4831, doi:10.5194/acp-11-4807-2011, 2011.

- Misztal, P. K., Owen, S. M., Guenther, A. B., Rasmussen, R., Geron, C., Harley, P., Phillips, G. J., Ryan, A., Edwards, D. P., Hewitt, C. N., Nemitz, E., Siong, J., Heal, M. R. and Cape, J. N.: Large estragole fluxes from oil palms in Borneo, *Atmos Chem Phys*, 10(9), 4343–4358, doi:10.5194/acp-10-4343-2010, 2010.
- 5 Misztal, P. K., Nemitz, E., Langford, B., Di Marco, C. F., Phillips, G. J., Hewitt, C. N., MacKenzie, A. R., Owen, S. M., Fowler, D., Heal, M. R. and Cape, J. N.: Direct ecosystem fluxes of volatile organic compounds from oil palms in South-East Asia. *Atmos Chem Phys*, 11(17), 8995–9017, doi:10.5194/acp-11-8995-2011, 2011.
- 10 Misztal, P. K., Hewitt, C. N., Wildt, J., Blande, J. D., Eller, A. S. D., Fares, S., Gentner, D. R., Gilman, J. B., Graus, M., Greenberg, J., Guenther, A. B., Hansel, A., Harley, P., Huang, M., Jardine, K., Karl, T., Kaser, L., Keutsch, F. N., Kiendler-Scharr, A., Kleist, E., Lerner, B. M., Li, T., Mak, J., Nölscher, A. C., Schnitzhofer, R., Sinha, V., Thornton, B., Warneke, C., Wegener, F., Werner, C., Williams, J., Worton, D. R., Yassaa, N. and Goldstein, A. H.: Atmospheric benzenoid emissions from plants rival those from fossil fuels. *Sci. Rep.*, 5, 12064, doi:10.1038/srep12064, 2015.
- Moody, J. L., Munger, J. W., Goldstein, A. H., Jacob, D. J. and Wofsy, S. C.: Harvard Forest regional-scale air mass composition by Patterns in Atmospheric Transport History (PATH), *J. Geophys. Res. Atmospheres*, 103(D11), 13181–13194, doi:10.1029/98JD00526, 1998.
- 15 Müller, K., Haferkorn, S., Grabmer, W., Wisthaler, A., Hansel, A., Kreuzwieser, J., Cojocariu, C., Rennenberg, H. and Herrmann, H.: Biogenic carbonyl compounds within and above a coniferous forest in Germany, *Atmos. Environ.*, 40, Supplement 1, 81–91, doi:10.1016/j.atmosenv.2005.10.070, 2006.
- 20 Munger, J. W., Wofsy, S. C., Bakwin, P. S., Fan, S.-M., Goulden, M. L., Daube, B. C., Goldstein, A. H., Moore, K. E. and Fitzjarrald, D. R.: Atmospheric deposition of reactive nitrogen oxides and ozone in a temperate deciduous forest and a subarctic woodland: 1. Measurements and mechanisms, *J. Geophys. Res. Atmospheres*, 101(D7), 12639–12657, doi:10.1029/96JD00230, 1996.
- Muramoto, S., Matsubara, Y., Mwenda, C. M., Koeduka, T., Sakami, T., Tani, A. and Matsui, K.: Glutathionylation and Reduction of Methacrolein in Tomato Plants Account for Its Absorption from the Vapor Phase [OPEN], *Plant Physiol.*, 169(3), 1744–1754, doi:10.1104/pp.15.01045, 2015.
- 25 Niinemets, Ü. and Reichstein, M.: Controls on the emission of plant volatiles through stomata: Differential sensitivity of emission rates to stomatal closure explained, *J. Geophys. Res. Atmospheres*, 108(D7), 4208, doi:10.1029/2002JD002620, 2003.
- Oikawa, P. Y. and Lerdau, M. T.: Catabolism of volatile organic compounds influences plant survival, *Trends Plant Sci.*, 18(12), 695–703, doi:10.1016/j.tplants.2013.08.011, 2013.
- 30 Omasa, K., Tobe, K., Hosomi, M. and Kobayashi, M.: Absorption of Ozone and Seven Organic Pollutants by *Populus nigra* and *Camellia sasanqua*, *Environ. Sci. Technol.*, 34(12), 2498–2500, doi:10.1021/es991285m, 2000.
- Omasa, K., Tobe, K. and Kondo, T.: Absorption of Organic and Inorganic Air Pollutants by Plants, in *Air Pollution and Plant Biotechnology*, edited by K. Omasa, H. Saji, S. Youssefian, and N. Kondo, pp. 155–178, Springer Japan. [online] Available from: [http://link.springer.com/chapter/10.1007/978-4-431-68388-9\\_8](http://link.springer.com/chapter/10.1007/978-4-431-68388-9_8) (Accessed 18 May 2016), 2002.
- 35 Owen, S. M., Harley, P., Guenther, A. and Hewitt, C. N.: Light dependency of VOC emissions from selected Mediterranean plant species, *Atmos. Environ.*, 36(19), 3147–3159, doi:10.1016/S1352-2310(02)00235-2, 2002.
- Pichersky, E., Noel, J. P. and Dudareva, N.: Biosynthesis of Plant Volatiles: Nature’s Diversity and Ingenuity, *Science*, 311(5762), 808–811, doi:10.1126/science.1118510, 2006.

- Pinho, P. G., Pio, C. A. and Jenkin, M. E.: Evaluation of isoprene degradation in the detailed tropospheric chemical mechanism, MCM v3, using environmental chamber data, *Atmos. Environ.*, 39(7), 1303–1322, doi:10.1016/j.atmosenv.2004.11.014, 2005.
- 5 Pöschl, U., Williams, J., Hoor, P., Fischer, H., Crutzen, P. J., Warneke, C., Holzinger, R., Hansel, A., Jordan, A., Lindinger, W., Scheeren, H. A., Peters, W. and Lelieveld, J.: High Acetone Concentrations throughout the 0–12 km Altitude Range over the Tropical Rainforest in Surinam, *J. Atmospheric Chem.*, 38(2), 115–132, doi:10.1023/A:1006370600615, 2001.
- Rasmussen, R. A. and Khalil, M. a. K.: Atmospheric benzene and toluene, *Geophys. Res. Lett.*, 10(11), 1096–1099, doi:10.1029/GL010i011p01096, 1983.
- 10 Rinne, J., Taipale, R., Markkanen, T., Ruuskanen, T. M., Hellén, H., Kajos, M. K., Vesala, T. and Kulmala, M.: Hydrocarbon fluxes above a Scots pine forest canopy: measurements and modeling, *Atmos Chem Phys*, 7(12), 3361–3372, doi:10.5194/acp-7-3361-2007, 2007.
- 15 Rivera-Rios, J. C., Nguyen, T. B., Crouse, J. D., Jud, W., St. Clair, J. M., Mikoviny, T., Gilman, J. B., Lerner, B. M., Kaiser, J. B., de Gouw, J., Wisthaler, A., Hansel, A., Wennberg, P. O., Seinfeld, J. H. and Keutsch, F. N.: Conversion of hydroperoxides to carbonyls in field and laboratory instrumentation: Observational bias in diagnosing pristine versus anthropogenically controlled atmospheric chemistry, *Geophys. Res. Lett.*, 41(23), 2014GL061919, doi:10.1002/2014GL061919, 2014.
- Rottenberger, S., Kuhn, U., Wolf, A., Schebeske, G., Oliva, S. T., Tavares, T. M. and Kesselmeier, J.: Exchange of Short-Chain Aldehydes Between Amazonian Vegetation and the Atmosphere, *Ecol. Appl.*, 14(sp4), 247–262, doi:10.1890/01-6027, 2004.
- 20 Schade, G. W. and Goldstein, A. H.: Fluxes of oxygenated volatile organic compounds from a ponderosa pine plantation, *J. Geophys. Res. Atmospheres*, 106(D3), 3111–3123, doi:10.1029/2000JD900592, 2001.
- Schade, G. W. and Goldstein, A. H.: Seasonal measurements of acetone and methanol: Abundances and implications for atmospheric budgets, *Glob. Biogeochem. Cycles*, 20(1), GB1011, doi:10.1029/2005GB002566, 2006.
- Schade, G. W., Solomon, S. J., Dellwik, E., Pilegaard, K. and Ladstätter-Weissenmayer, A.: Methanol and other VOC fluxes from a Danish beech forest during late springtime, *Biogeochemistry*, 106(3), 337–355, doi:10.1007/s10533-010-9515-5, 2011.
- 25 Schallhart, S., Rantala, P., Nemitz, E., Taipale, D., Tillmann, R., Mentel, T. F., Loubet, B., Gerosa, G., Finco, A., Rinne, J. and Ruuskanen, T. M.: Characterization of total ecosystem-scale biogenic VOC exchange at a Mediterranean oak–hornbeam forest, *Atmos Chem Phys*, 16(11), 7171–7194, doi:10.5194/acp-16-7171-2016, 2016.
- Schneider, C. A., Rasband, W. S. and Eliceiri, K. W.: NIH Image to ImageJ: 25 years of image analysis, *Nat. Methods*, 9(7), 671–675, doi:10.1038/nmeth.2089, 2012.
- 30 Schürmann, W., Ziegler, H., Kotzias, D., Schönwitz, R. and Steinbrecher, R.: Emission of biosynthesized monoterpenes from needles of Norway Spruce, *Naturwissenschaften*, 80(6), 276–278, doi:10.1007/BF01135913, 1993.
- Seco, R., Karl, T., Guenther, A., Hosman, K. P., Pallardy, S. G., Gu, L., Geron, C., Harley, P. and Kim, S.: Ecosystem-scale volatile organic compound fluxes during an extreme drought in a broadleaf temperate forest of the Missouri Ozarks (central USA), *Glob. Change Biol.*, 21(10), 3657–3674, doi:10.1111/gcb.12980, 2015.
- 35 Sharkey, T. D., Singsaas, E. L., Vanderveer, P. J. and Geron, C.: Field measurements of isoprene emission from trees in response to temperature and light, *Tree Physiol.*, 16(7), 649–654, 1996.



- Shimoda, K., Kubota, N., Hamada, H., Yamane, S. and Hirata, T.: Asymmetric Transformation of Enones with <I>Synechococcus</I> sp. PCC 7942, Bull. Chem. Soc. Jpn., 77(12), 2269–2272, doi:10.1246/bcsj.77.2269, 2004.
- Spanel, P. and Smith, D.: SIFT studies of the reactions of H<sub>3</sub>O<sup>+</sup>, NO<sup>+</sup> and O<sub>2</sub><sup>+</sup> with a series of alcohols, Int. J. Mass Spectrom. Ion Process., 167, 375–388, doi:10.1016/S0168-1176(97)00085-2, 1997.
- 5 Spanel, P. and Smith, D.: Selected ion flow tube studies of the reactions of H<sub>3</sub>O<sup>+</sup> NO<sup>+</sup>, and O-2(+) with several aromatic and aliphatic hydrocarbons, Int. J. Mass Spectrom., 181, 1–10, 1998.
- Spirig, C., Neftel, A., Ammann, C., Dommen, J., Grabmer, W., Thielmann, A., Schaub, A., Beauchamp, J., Wisthaler, A. and Hansel, A.: Eddy covariance flux measurements of biogenic VOCs during ECHO 2003 using proton transfer reaction mass spectrometry, Atmos Chem Phys, 5(2), 465–481, doi:10.5194/acp-5-465-2005, 2005.
- 10 Steinbrecher, R., Smiatek, G., Köble, R., Seufert, G., Theloke, J., Hauff, K., Ciccioli, P., Vautard, R. and Curci, G.: Intra- and inter-annual variability of VOC emissions from natural and semi-natural vegetation in Europe and neighbouring countries, Atmos. Environ., 43(7), 1380–1391, doi:10.1016/j.atmosenv.2008.09.072, 2009.
- Su, T.: Parametrization of kinetic energy dependences of ion–polar molecule collision rate constants by trajectory calculations, J. Chem. Phys., 100(6), 4703, doi:10.1063/1.466255, 1994.
- 15 Tang, Y.-X. and Suga, T.: The International Journal of Plant Biochemistry Biotransformation of  $\alpha$ - and  $\beta$ -ionones by immobilized cells of *Nicotiana tabacum*, Phytochemistry, 37(3), 737–740, doi:10.1016/S0031-9422(00)90349-2, 1994.
- Tani, A. and Hewitt, C. N.: Uptake of Aldehydes and Ketones at Typical Indoor Concentrations by Houseplants, Environ. Sci. Technol., 43(21), 8338–8343, doi:10.1021/es9020316, 2009.
- Titzmann, T., Graus, M., Müller, M., Hansel, A. and Ostermann, A.: Improved peak analysis of signals based on counting systems: Illustrated for proton-transfer-reaction time-of-flight mass spectrometry, Int. J. Mass Spectrom., 295(1–2), 72–77, doi:10.1016/j.ijms.2010.07.009, 2010.
- 20 Ugrekheldze, D., Korte, F. and Kvesitadze, G.: Uptake and Transformation of Benzene and Toluene by Plant Leaves, Ecotoxicol. Environ. Saf., 37(1), 24–29, doi:10.1006/eesa.1996.1512, 1997.
- Ugrekheldze, D. S.: Metabolism of Exogenous Alkanes and Aromatic Hydrocarbons in Plants, Metsniereba, Tbilisi., 1976.
- 25 Urbanski, S., Barford, C., Wofsy, S., Kucharik, C., Pyle, E., Budney, J., McKain, K., Fitzjarrald, D., Czikowsky, M. and Munger, J. W.: Factors controlling CO<sub>2</sub> exchange on timescales from hourly to decadal at Harvard Forest, J. Geophys. Res., 112(G2), doi:10.1029/2006JG000293, 2007.
- Velikova, V., Fares, S. and Loreto, F.: Isoprene and nitric oxide reduce damages in leaves exposed to oxidative stress, Plant Cell Environ., 31(12), 1882–1894, doi:10.1111/j.1365-3040.2008.01893.x, 2008.
- 30 Vickers, C. E., Possell, M., Cojocariu, C. I., Velikova, V. B., Laothawornkitkul, J., Ryan, A., Mullineaux, P. M. and Nicholas Hewitt, C.: Isoprene synthesis protects transgenic tobacco plants from oxidative stress, Plant Cell Environ., 32(5), 520–531, doi:10.1111/j.1365-3040.2009.01946.x, 2009.
- Vollenweider, S., Weber, H., Stolz, S., Chételat, A. and Farmer, E. E.: Fatty acid ketodienes and fatty acid ketotrienes: Michael addition acceptors that accumulate in wounded and diseased Arabidopsis leaves, Plant J. Cell Mol. Biol., 24(4), 467–476, 2000.
- 35

- Wanner, P. and Tressl, R.: Purification and characterization of two enone reductases from *Saccharomyces cerevisiae*, *Eur. J. Biochem.*, 255(1), 271–278, doi:10.1046/j.1432-1327.1998.2550271.x, 1998.
- Warneke, C., de Gouw, J. A., Kuster, W. C., Goldan, P. D. and Fall, R.: Validation of Atmospheric VOC Measurements by Proton-Transfer- Reaction Mass Spectrometry Using a Gas-Chromatographic Preseparation Method, *Environ. Sci. Technol.*, 37(11), 2494–2501, doi:10.1021/es026266i, 2003.
- White, M. L., Russo, R. S., Zhou, Y., Ambrose, J. L., Haase, K., Frinak, E. K., Varner, R. K., Wingenter, O. W., Mao, H., Talbot, R. and Sive, B. C.: Are biogenic emissions a significant source of summertime atmospheric toluene in the rural Northeastern United States?, *Atmospheric Chem. Phys.*, 9(1), 81–92, doi:10.5194/acp-9-81-2009, 2009.
- Winters, A. J., Adams, M. A., Bleby, T. M., Rennenberg, H., Steigner, D., Steinbrecher, R. and Kreuzwieser, J.: Emissions of isoprene, monoterpene and short-chained carbonyl compounds from *Eucalyptus* spp. in southern Australia, *Atmos. Environ.*, 43(19), 3035–3043, doi:10.1016/j.atmosenv.2009.03.026, 2009.
- Wohlfahrt, G., Brilli, F., Hörtnagl, L., Xu, X., Bingemer, H., Hansel, A. and Loreto, F.: Carbonyl sulfide (COS) as a tracer for canopy photosynthesis, transpiration and stomatal conductance: potential and limitations†, *Plant Cell Environ.*, 35(4), 657–667, doi:10.1111/j.1365-3040.2011.02451.x, 2012.
- Yáñez-Serrano, A. M., Nölscher, A. C., Bourtsoukidis, E., Derstroff, B., Zannoni, N., Gros, V., Lanza, M., Brito, J., Noe, S. M., House, E., Hewitt, C. N., Langford, B., Nemitz, E., Behrendt, T., Williams, J., Artaxo, P., Andreae, M. O. and Kesselmeier, J.: Atmospheric mixing ratios of methyl ethyl ketone (2-butanone) in tropical, boreal, temperate and marine environments, *Atmospheric Chem. Phys. Discuss.*, 0, 1–32, doi:10.5194/acp-2016-317, 2016.
- Amelynek, C., Schoon, N., Kuppens, T., Bultinek, P. and Arijs, E.: A selected ion flow tube study of the reactions of H<sub>3</sub>O<sup>+</sup>, NO<sup>+</sup> and O<sub>2</sub><sup>+</sup> with some oxygenated biogenic volatile organic compounds, *Int. J. Mass Spectrom.*, 247(1–3), 1–9, doi:10.1016/j.ijms.2005.08.010, 2005.
- Andreae, M. O., Artaxo, P., Brandão, C., Carswell, F. E., Ciccioli, P., da Costa, A. L., Culf, A. D., Esteves, J. L., Gash, J. H. C., Grace, J., Kabat, P., Lelieveld, J., Malhi, Y., Manzi, A. O., Meixner, F. X., Nobre, A. D., Nobre, C., Ruiivo, M. d. L. P., Silva Dias, M. A., Stefani, P., Valentini, R., von Jouanne, J. and Waterloo, M. J.: Biogeochemical cycling of carbon, water, energy, trace gases, and aerosols in Amazonia: The LBA EUSTACH experiments, *J. Geophys. Res. Atmospheres*, 107(D20), 8066, doi:10.1029/2001JD000524, 2002.
- Atkinson, R.: Atmospheric chemistry of VOCs and NO<sub>x</sub>, *Atmos. Environ.*, 34(12–14), 2063–2101, doi:10.1016/S1352-2310(99)00460-4, 2000.
- Atkinson, R. and Arey, J.: Atmospheric Chemistry of Biogenic Organic Compounds, *Acc. Chem. Res.*, 31(9), 574–583, doi:10.1021/ar970143z, 1998.
- Atkinson, R., Carter, W. P. L., Darnall, K. R., Winer, A. M. and Pitts, J. N.: A smog chamber and modeling study of the gas phase NO<sub>x</sub>–air photooxidation of toluene and the cresols, *Int. J. Chem. Kinet.*, 12(11), 779–836, doi:10.1002/kin.550121102, 1980.
- Baeza-Romero, M. T., Blitz, M. A., Heard, D. E., Pilling, M. J., Price, B., Seakins, P. W. and Wang, L.: Photolysis of methylethyl, diethyl and methylvinyl ketones and their role in the atmospheric HO<sub>x</sub> budget, *Faraday Discuss.*, 130(0), 73–88, doi:10.1039/B419160A, 2005.
- Batten, J. H., Stutte, G. W. and Wheeler, R. M.: Effect of crop development on biogenic emissions from plant populations grown in closed plant growth chambers, *Phytochemistry*, 39(6), 1351–1357, 1995.



- Benkovitz, C. M., Schwartz, S. E., Jensen, M. P., Miller, M. A., Easter, R. C. and Bates, T. S.: Modeling atmospheric sulfur over the Northern Hemisphere during the Aerosol Characterization Experiment 2 experimental period, *J. Geophys. Res. Atmospheres*, 109(D22), D22207, doi:10.1029/2004JD004939, 2004.
- 5 Blake, R., Monks, P. and Ellis, A.: Proton Transfer Reaction Mass Spectrometry, *Chem. Rev.*, 109(3), 861–896, doi:10.1021/cr800364q, 2009.
- Boatright, J., Negre, F., Chen, X., Kish, C. M., Wood, B., Peel, G., Orlova, I., Gang, D., Rhodes, D. and Dudareva, N.: Understanding in Vivo Benzenoid Metabolism in Petunia Petal Tissue, *Plant Physiol.*, 135(4), 1993–2011, doi:10.1104/pp.104.045468, 2004.
- Boose, E.: Fisher Meteorological Station at Harvard Forest since 2001., *Harv. For. Data Arch.* HF001, 2001.
- 10 Bouchoux, G., Salpin, J. Y. and Leblanc, D.: A relationship between the kinetics and thermochemistry of proton transfer reactions in the gas phase, *Int. J. MASS Spectrom. ION Process.*, 153(1), 37–48, 1996.
- Bouvier Brown, N. C., Goldstein, A. H., Worton, D. R., Matross, D. M., Gilman, J. B., Kuster, W. C., Welsh Bon, D., Warneke, C., de Gouw, J. A., Cahill, T. M. and Holzinger, R.: Methyl chavicol: characterization of its biogenic emission rate, abundance, and oxidation products in the atmosphere, *Atmos Chem Phys*, 9(6), 2061–2074, doi:10.5194/acp 9 2061 2009, 15 2009.
- Bracho Nunez, A., Knothe, N. M., Welter, S., Staudt, M., Costa, W. R., Liberato, M. A. R., Piedade, M. T. F. and Kesselmeier, J.: Leaf level emissions of volatile organic compounds (VOC) from some Amazonian and Mediterranean plants, *Biogeosciences*, 10(9), 5855–5873, doi:10.5194/bg 10 5855 2013, 2013.
- 20 Brillì, F., Ciccìoli, P., Frattoni, M., Prestinìnzì, M., Spanedda, A. F. and Loreto, F.: Constitutive and herbivore induced monoterpenes emitted by *Populus x euroamericana* leaves are key volatiles that orient *Chrysomela populi* beetles, *Plant Cell Environ.*, 32(5), 542–552, doi:10.1111/j.1365-3040.2009.01948.x, 2009.
- Cappellin, L., Biasioli, F., Fabris, A., Schuhfried, E., Soukoulis, C., Märk, T. and Gasperi, F.: Improved mass accuracy in PTR TOF MS: Another step towards better compound identification in PTR MS, *Int. J. Mass Spectrom.*, 290(1), 60–63, doi:10.1016/j.ijms.2009.11.007, 2010.
- 25 Cappellin, L., Biasioli, F., Schuhfried, E., Soukoulis, C., Märk, T. D. and Gasperi, F.: Extending the dynamic range of proton transfer reaction time of flight mass spectrometers by a novel dead time correction, *Rapid Commun. Mass Spectrom. RCM*, 25(1), 179–183, doi:10.1002/rem.4819, 2011a.
- Cappellin, L., Biasioli, F., Granitto, P. M., Schuhfried, E., Soukoulis, C., Costa, F., Märk, T. D. and Gasperi, F.: On data analysis in PTR TOF MS: From raw spectra to data mining, *Sens. Actuators B Chem.*, 155(1), 183–190, doi:10.1016/j.snb.2010.11.044, 2011b.
- 30 Cappellin, L., Karl, T., Probst, M., Ismailova, O., Winkler, P. M., Soukoulis, C., Aprea, E., Märk, T. D., Gasperi, F. and Biasioli, F.: On Quantitative Determination of Volatile Organic Compound Concentrations Using Proton Transfer Reaction Time of Flight Mass Spectrometry, *Env. Sci Technol*, 46(4), 2283–2290, doi:10.1021/es203985t, 2012.
- Carlton, A. G., Wiedinmyer, C. and Kroll, J. H.: A review of Secondary Organic Aerosol (SOA) formation from isoprene, *Atmos Chem Phys*, 9(14), 4987–5005, doi:10.5194/acp 9 4987 2009, 2009.
- 35

- Claeys, M., Graham, B., Vas, G., Wang, W., Vermeylen, R., Pashynska, V., Cafmeyer, J., Guyon, P., Andreae, M. O., Artaxo, P. and Maenhaut, W.: Formation of Secondary Organic Aerosols Through Photooxidation of Isoprene, *Science*, 303(5661), 1173–1176, doi:10.1126/science.1092805, 2004.
- 5 Cojocariu, C., Kreuzwieser, J. and Rennenberg, H.: Correlation of short chained carbonyls emitted from *Picea abies* with physiological and environmental parameters, *New Phytol.*, 162(3), 717–727, doi:10.1111/j.1469-8137.2004.01061.x, 2004.
- Dani, K. G. S., Fineschi, S. and Loreto, F.: Biogenic Volatile Isoprenoid Emission and Levels of Natural Selection, *J. Indian Inst. Sci.*, 95(1), 1–14, 2015.
- Dudareva, N., Negre, F., Nagegowda, D. A. and Orlova, I.: Plant Volatiles: Recent Advances and Future Perspectives, *Crit. Rev. Plant Sci.*, 25(5), 417–440, doi:10.1080/07352680600899973, 2006.
- 10 Duine, J. A. and Frank, J.: The prosthetic group of methanol dehydrogenase. Purification and some of its properties, *Biochem. J.*, 187(1), 221–226, 1980.
- Durmishidze, S. V.: Cleavage of the Aromatic Ring of Some Exogenous Compounds in Plants, *Metsniereba*, Tbilisi., 1975.
- Ebata, T., Anezaki, Y., Fujii, M., Mikami, N. and Ito, M.: High Rydberg states of nitric oxide studied by two-color multiphoton spectroscopy, *J. Phys. Chem.*, 87(24), 4773–4776, doi:10.1021/j150642a001, 1983.
- 15 Elliot, A. J. and McCracken, D. R.: Effect of temperature on  $O_2$  reactions and equilibria: A pulse radiolysis study, *Int. J. Radiat. Appl. Instrum. Part C Radiat. Phys. Chem.*, 33(1), 69–74, doi:10.1016/1359-0197(89)90096-9, 1989.
- Fall, R.: Abundant oxygenates in the atmosphere: a biochemical perspective, *Chem. Rev.*, 103(12), 4941–4952, doi:10.1021/cr0206521, 2003.
- Fall, R. and Benson, A. A.: Leaf methanol—the simplest natural product from plants, *Trends Plant Sci.*, 1(9), 296–301, doi:10.1016/S1360-1385(96)88175-0, 1996.
- 20 Fares, S., Paoletti, E., Loreto, F. and Brilli, F.: Bidirectional Flux of Methyl Vinyl Ketone and Methacrolein in Trees with Different Isoprenoid Emission under Realistic Ambient Concentrations, *Environ. Sci. Technol.*, 49(13), 7735–7742, doi:10.1021/acs.est.5b00673, 2015.
- Filella, I., Peñuelas, J. and Seco, R.: Short chained oxygenated VOC emissions in *Pinus halepensis* in response to changes in water availability, *Acta Physiol. Plant.*, 31(2), 311–318, doi:10.1007/s11738-008-0235-6, 2009.
- 25 French, E. C.: The Electrochemical Reduction of Methyl Vinyl Ketone in Aqueous Solutions, North Texas State University., 1970.
- Galbally, I. E. and Kirstine, W.: The Production of Methanol by Flowering Plants and the Global Cycle of Methanol, *J. Atmospheric Chem.*, 43(3), 195–229, doi:10.1023/A:1020684815474, 2002.
- 30 Geron, C., Guenther, A., Greenberg, J., Loescher, H. W., Clark, D. and Baker, B.: Biogenic volatile organic compound emissions from a lowland tropical wet forest in Costa Rica, *Atmos. Environ.*, 36(23), 3793–3802, doi:10.1016/S1352-2310(02)00301-1, 2002.
- Goldstein, A. H. and Galbally, I. E.: Known and Unexplored Organic Constituents in the Earth's Atmosphere, *Environ. Sci. Technol.*, 41(5), 1514–1521, doi:10.1021/es072476p, 2007.

- Goldstein, A. H. and Schade, G. W.: Quantifying biogenic and anthropogenic contributions to acetone mixing ratios in a rural environment, *Atmos. Environ.*, 34(29–30), 4997–5006, doi:10.1016/S1352-2310(00)00321-6, 2000.
- Gout, E.: Metabolism of Methanol in Plant Cells. Carbon-13 Nuclear Magnetic Resonance Studies, *PLANT Physiol.*, 123(1), 287–296, doi:10.1104/pp.123.1.287, 2000.
- 5 de Gouw, J. A., Howard, C. J., Custer, T. G. and Fall, R.: Emissions of volatile organic compounds from cut grass and clover are enhanced during the drying process, *Geophys. Res. Lett.*, 26(7), 811–814, doi:10.1029/1999GL900076, 1999.
- de Gouw, J. A., Warneke, C., Stohl, A., Wollny, A. G., Broek, C. A., Cooper, O. R., Holloway, J. S., Trainer, M., Fehsenfeld, F. C., Atlas, E. L., Donnelly, S. G., Stroud, V. and Lueb, A.: Volatile organic compounds composition of merged and aged forest fire plumes from Alaska and western Canada, *J. Geophys. Res. Atmospheres*, 111(D10), D10303, doi:10.1029/2005JD006175, 2006.
- 10 de Gouw, J. and Warneke, C.: Measurements of volatile organic compounds in the earths atmosphere using proton transfer reaction mass spectrometry, *Mass Spectrom. Rev.*, 26(2), 223–257, doi:10.1002/mas.20119, 2007.
- de Gouw, J., Warneke, C., Karl, T., Eerdeken, G., van der Veen, C. and Fall, R.: Sensitivity and specificity of atmospheric trace gas detection by proton transfer reaction mass spectrometry, *Int. J. Mass Spectrom.*, 223(1–3), 365–382, 2003.
- 15 Grabmer, W., Kreuzwieser, J., Wisthaler, A., Cojocariu, C., Graus, M., Rennenberg, H., Steigner, D., Steinbrecher, R. and Hansel, A.: VOC emissions from Norway spruce (*Picea abies* L. [Karst]) twigs in the field—Results of a dynamic enclosure study, *Atmos. Environ.*, 40, Supplement 1, 128–137, doi:10.1016/j.atmosenv.2006.03.043, 2006.
- Graedel, T. E.: Chemical compounds in the atmosphere, Academic Press, New York., 1978.
- Griffin, R. J., Cocker, D. R., Flagan, R. C. and Seinfeld, J. H.: Organic aerosol formation from the oxidation of biogenic hydrocarbons, *J. Geophys. Res. Atmospheres*, 104(D3), 3555–3567, doi:10.1029/1998JD100049, 1999.
- 20 Grosjean, D.: Atmospheric reactions of styrenes and peroxybenzoyl nitrate, *Sci. Total Environ.*, 46(1–4), 41–59, doi:10.1016/0048-9697(85)90282-7, 1985.
- Gruber, K., Gartler, G., Krammer, B., Schwab, H. and Kratky, C.: Reaction mechanism of hydroxynitrile lyases of the alpha/beta hydrolase superfamily: the three dimensional structure of the transient enzyme substrate complex certifies the crucial role of LYS236, *J. Biol. Chem.*, 279(19), 20501–20510, doi:10.1074/jbc.M401575200, 2004.
- 25 Guenther, A.: The contribution of reactive carbon emissions from vegetation to the carbon balance of terrestrial ecosystems, *Chemosphere*, 49(8), 837–844, doi:10.1016/S0045-6535(02)00384-3, 2002.
- Guenther, A., Hewitt, C. N., Erickson, D., Fall, R., Geron, C., Graedel, T., Harley, P., Klinger, L., Lerdau, M., McKay, W. A., Pierce, T., Scholes, B., Steinbrecher, R., Tallamraju, R., Taylor, J. and Zimmerman, P.: A global model of natural volatile organic compound emissions, *J. Geophys. Res. Atmospheres*, 100(D5), 8873–8892, doi:10.1029/94JD02950, 1995.
- 30 Guenther, A., Karl, T., Harley, P., Wiedinmyer, C., Palmer, P. I. and Geron, C.: Estimates of global terrestrial isoprene emissions using MEGAN (Model of Emissions of Gases and Aerosols from Nature), *Atmos Chem Phys*, 6(11), 3181–3210, doi:10.5194/acp-6-3181-2006, 2006.
- Hakola, H., Rinne, J. and Laurila, T.: The hydrocarbon emission rates of tea leafed willow (*Salix phylicifolia*), silver birch (*Betula pendula*) and European aspen (*Populus tremula*), *Atmos. Environ.*, 32(10), 1825–1833, doi:10.1016/S1352-2310(97)00482-2, 1998.
- 35

- Hakola, H., Tarvainen, V., Laurila, T., Hiltunen, V., Hellén, H. and Keronen, P.: Seasonal variation of VOC concentrations above a boreal coniferous forest, *Atmos. Environ.*, 37(12), 1623–1634, doi:10.1016/S1352-2310(03)00014-1, 2003.
- 5 Harley, P., Fridd-Stroud, V., Greenberg, J., Guenther, A. and Vasconcellos, P.: Emission of 2-methyl-3-buten-2-ol by pines: A potentially large natural source of reactive carbon to the atmosphere, *J. Geophys. Res. Atmospheres*, 103(D19), 25479–25486, doi:10.1029/98JD00820, 1998.
- Harley, P., Greenberg, J., Niinemets, Ü. and Guenther, A.: Environmental controls over methanol emission from leaves, *Biogeosciences*, 4(6), 1083–1099, doi:10.5194/bg-4-1083-2007, 2007.
- 10 Harrison, S. P., Morfopoulos, C., Dani, K. G. S., Prentice, I. C., Arneth, A., Atwell, B. J., Barkley, M. P., Leishman, M. R., Loreto, F., Medlyn, B. E., Niinemets, Ü., Possell, M., Peñuelas, J. and Wright, I. J.: Volatile isoprenoid emissions from plastid to planet, *New Phytol.*, 197(1), 49–57, doi:10.1111/nph.12021, 2013.
- Heiden, A. C., Kobel, K., Komenda, M., Koppmann, R., Shao, M. and Wildt, J.: Toluene emissions from plants, *Geophys. Res. Lett.*, 26(9), 1283–1286, doi:10.1029/1999GL900220, 1999.
- 15 Helmig, D., Balsley, B., Davis, K., Kuck, L. R., Jensen, M., Bognar, J., Smith, T., Arrieta, R. V., Rodríguez, R. and Birks, J. W.: Vertical profiling and determination of landscape fluxes of biogenic nonmethane hydrocarbons within the planetary boundary layer in the Peruvian Amazon, *J. Geophys. Res. Atmospheres*, 103(D19), 25519–25532, doi:10.1029/98JD01023, 1998.
- Helmig, D., Klinger, L. F., Guenther, A., Vierling, L., Geron, C. and Zimmerman, P.: Biogenic volatile organic compound emissions (BVOCs) I. Identifications from three continental sites in the U.S., *Chemosphere*, 38(9), 2163–2187, doi:10.1016/S0045-6535(98)00425-1, 1999.
- 20 Helmig, D., Ortega, J., Guenther, A., Herrick, J. D. and Geron, C.: Sesquiterpene emissions from loblolly pine and their potential contribution to biogenic aerosol formation in the Southeastern US, *Atmos. Environ.*, 40(22), 4150–4157, doi:10.1016/j.atmosenv.2006.02.035, 2006.
- Herrmann, K.: The Shikimate Pathway: Early Steps in the Biosynthesis of Aromatic Compounds., *Plant Cell*, 7(7), 907–919, 1995.
- 25 Holland, M. A. and Polacco, J. C.: PPFMs and Other Covert Contaminants: Is There More to Plant Physiology Than Just Plant?, *Annu. Rev. Plant Physiol. Plant Mol. Biol.*, 45(1), 197–209, doi:10.1146/annurev.pp.45.060194.001213, 1994.
- Holzinger, R., Sandoval-Soto, L., Rottenberger, S., Crutzen, P. J. and Kesselmeier, J.: Emissions of volatile organic compounds from *Quercus ilex* L. measured by Proton-Transfer Reaction Mass Spectrometry under different environmental conditions, *J. Geophys. Res. Atmospheres*, 105(D16), 20573–20579, doi:10.1029/2000JD900296, 2000.
- 30 Isidorov, V. A., Zenkevich, I. G. and Ioffe, B. V.: Volatile organic compounds in the atmosphere of forests, *Atmospheric Environ.* 1967, 19(1), 1–8, doi:10.1016/0004-6981(85)90131-3, 1985.
- Jacob, D. J., Field, B. D., Jin, E. M., Bey, I., Li, Q., Logan, J. A., Yantosca, R. M. and Singh, H. B.: Atmospheric budget of acetone, *J. Geophys. Res. Atmospheres*, 107(D10), ACH 5-1 ACH 5-17, doi:10.1029/2001JD000694, 2002.
- 35 Janson, R. and de Serves, C.: Acetone and monoterpene emissions from the boreal forest in northern Europe, *Atmos. Environ.*, 35(27), 4629–4637, doi:10.1016/S1352-2310(01)00160-1, 2001.

- Jardine, K., Harley, P., Karl, T., Guenther, A., Lerdau, M. and Mak, J. E.: Plant physiological and environmental controls over the exchange of acetaldehyde between forest canopies and the atmosphere, *Biogeosciences*, 5(6), 1559–1572, doi:10.5194/bg-5-1559-2008, 2008.
- 5 Jardine, K., Abrell, L., Kure, S. A., Huxman, T., Ortega, J. and Guenther, A.: Volatile organic compound emissions from *Larrea tridentata* (creosotebush), *Atmos Chem Phys*, 10(24), 12191–12206, doi:10.5194/acp-10-12191-2010, 2010.
- Jardine, K. J., Monson, R. K., Abrell, L., Saleska, S. R., Arneth, A., Jardine, A., Ishida, F. Y., Serrano, A. M. Y., Artaxo, P., Karl, T., Fares, S., Goldstein, A., Loreto, F. and Huxman, T.: Within plant isoprene oxidation confirmed by direct emissions of oxidation products methyl vinyl ketone and methacrolein, *Glob. Change Biol.*, 18(3), 973–984, doi:10.1111/j.1365-2486.2011.02610.x, 2012.
- 10 Jordan, A., Haidacher, S., Hanel, G., Hartungen, E., Herbig, J., Märk, L., Schottkowsky, R., Seehauser, H., Sulzer, P. and Märk, T. D.: An online ultra-high sensitivity Proton transfer reaction mass spectrometer combined with switchable reagent ion capability (PTR + SRI – MS), *Int. J. Mass Spectrom.*, 286(1), 32–38, doi:10.1016/j.ijms.2009.06.006, 2009.
- 15 Kanakidou, M., Seinfeld, J. H., Pandis, S. N., Barnes, I., Dentener, F. J., Facchini, M. C., Van Dingenen, R., Ervens, B., Nenes, A., Nielsen, C. J., Swietliński, E., Putaud, J. P., Balkanski, Y., Fuzzi, S., Horth, J., Moortgat, G. K., Winterhalter, R., Myhre, C. E. L., Tsigaridis, K., Vignati, E., Stephanou, E. G. and Wilson, J.: Organic aerosol and global climate modelling: a review, *Atmospheric Chem. Phys.*, 5(4), 1053–1123, doi:10.5194/acp-5-1053-2005, 2005.
- Karl, T., Curtis, A. J., Rosenstiel, T. N., Monson, R. K. and Fall, R.: Transient releases of acetaldehyde from tree leaves – products of a pyruvate overflow mechanism?, *Plant Cell Environ.*, 25(9), 1121–1131, doi:10.1046/j.1365-3040.2002.00889.x, 2002a.
- 20 Karl, T., Guenther, A., Spirig, C., Hansel, A. and Fall, R.: Seasonal variation of biogenic VOC emissions above a mixed hardwood forest in northern Michigan, *Geophys. Res. Lett.*, 30(23), 2186, doi:10.1029/2003GL018432, 2003.
- Karl, T., Potosnak, M., Guenther, A., Clark, D., Walker, J., Herrick, J. D. and Geron, C.: Exchange processes of volatile organic compounds above a tropical rain forest: Implications for modeling tropospheric chemistry above dense vegetation, *J. Geophys. Res. Atmospheres*, 109(D18), D18306, doi:10.1029/2004JD004738, 2004.
- 25 Karl, T., Harley, P., Guenther, A., Rasmussen, R., Baker, B., Jardine, K. and Nemitz, E.: The bi-directional exchange of oxygenated VOCs between a loblolly pine (*Pinus taeda*) plantation and the atmosphere, *Atmos Chem Phys*, 5(11), 3015–3031, doi:10.5194/acp-5-3015-2005, 2005.
- Karl, T., Harley, P., Emmons, L., Thornton, B., Guenther, A., Basu, C., Turnipseed, A. and Jardine, K.: Efficient Atmospheric Cleansing of Oxidized Organic Trace Gases by Vegetation, *Science*, 330(6005), 816–819, doi:10.1126/science.1192534, 2010.
- 30 Karl, T., Hansel, A., Cappellin, L., Kaser, L., Herdlinger-Blatt, I. and Jud, W.: Selective measurements of isoprene and 2-methyl 3-buten-2-ol based on NO<sup>+</sup> ionization mass spectrometry, *Atmos Chem Phys*, 12(24), 11877–11884, doi:10.5194/acp-12-11877-2012, 2012.
- Karl, T. G., Spirig, C., Rinne, J., Stroud, C., Prevost, P., Greenberg, J., Fall, R. and Guenther, A.: Virtual disjunct eddy covariance measurements of organic compound fluxes from a subalpine forest using proton transfer reaction mass spectrometry, *Atmos Chem Phys*, 2(4), 279–291, doi:10.5194/acp-2-279-2002, 2002b.
- 35 Kavouras, I. G., Mihalopoulos, N. and Stephanou, E. G.: Formation of atmospheric particles from organic acids produced by forests, *Nature*, 395(6703), 683–686, doi:10.1038/27179, 1998.

- Kergomard, A., Renard, M. F., Veschambre, H., Courtois, D. and Petiard, V.: Reduction of  $\alpha,\beta$ -unsaturated ketones by plant suspension cultures, *Phytochemistry*, 27(2), 407–409, doi:10.1016/0031-9422(88)83108-X, 1988.
- 5 Kim, S., Karl, T., Guenther, A., Tyndall, G., Orlando, J., Harley, P., Rasmussen, R. and Apel, E.: Emissions and ambient distributions of Biogenic Volatile Organic Compounds (BVOC) in a ponderosa pine ecosystem: interpretation of PTR-MS mass spectra, *Atmos Chem Phys*, 10(4), 1759–1771, doi:10.5194/acp-10-1759-2010, 2010.
- Kim, S., Guenther, A., Karl, T. and Greenberg, J.: Contributions of primary and secondary biogenic VOC to total OH reactivity during the CABINEX (Community Atmosphere-Biosphere Interactions Experiments) 09 field campaign, *Atmospheric Chem. Phys.*, 11(16), 8613–8623, doi:10.5194/acp-11-8613-2011, 2011.
- 10 Kirch, H. H., Bartels, D., Wei, Y., Schnable, P. S. and Wood, A. J.: The ALDH gene superfamily of Arabidopsis, *Trends Plant Sci.*, 9(8), 371–377, doi:10.1016/j.tplants.2004.06.004, 2004.
- Kirstine, W., Galbally, I., Ye, Y. and Hooper, M.: Emissions of volatile organic compounds (primarily oxygenated species) from pasture, *J. Geophys. Res. Atmospheres*, 103(D9), 10605–10619, doi:10.1029/97JD03753, 1998.
- 15 Knighton, W. B., Fortner, E. C., Herndon, S. C., Wood, E. C. and Miatek-Lye, R. C.: Adaptation of a proton-transfer reaction mass spectrometer instrument to employ  $\text{NO}^+$  as reagent ion for the detection of 1,3-butadiene in the ambient atmosphere, *Rapid Commun. Mass Spectrom.* RCM, 23(20), 3301–3308, doi:10.1002/rem.4249, 2009.
- Knudsen, J. T., Eriksson, R., Gershenzon, J. and Ståhl, B.: Diversity and distribution of floral scent, *Bot. Rev.*, 72(1), 1, doi:10.1663/0006-8101(2006)72[1:DADDFS]2.0.CO;2, 2006.
- Kondo, T., Hasegawa, K., Kitagawa, C., Uchida, R. and Onishi, M.: Absorption of Atmospheric Phenol by Evergreen Broad-leaved Tree Species., *Chem. Lett.*, (11), 997–998, doi:10.1246/cl.1996.997, 1996.
- 20 Kondo, T., Hasegawa, K., Uchida, R. and Onishi, M.: Absorption of atmospheric C<sub>2</sub>–C<sub>5</sub> aldehydes by various tree species and their tolerance to C<sub>2</sub>–C<sub>5</sub> aldehydes, *Sci. Total Environ.*, 224(1–3), 121–132, doi:10.1016/S0048-9697(98)00320-9, 1998.
- Kreuzwieser, J., Scheerer, U. and Rennenberg, H.: Metabolic origin of acetaldehyde emitted by poplar (*Populus tremula* × *P. alba*) trees, *J. Exp. Bot.*, 50(335), 757–765, doi:10.1093/jxb/50.335.757, 1999.
- 25 Laffineur, Q., Aubinet, M., Schoon, N., Amelynck, C., Müller, J. F., Dewulf, J., Van Langenhove, H., Steppe, K. and Heinesch, B.: Abiotic and biotic control of methanol exchanges in a temperate mixed forest, *Atmos Chem Phys*, 12(1), 577–590, doi:10.5194/acp-12-577-2012, 2012.
- Leone, J. A. and Seinfeld, J. H.: Updated chemical mechanism for atmospheric photooxidation of toluene, *Int. J. Chem. Kinet.*, 16(2), 159–193, doi:10.1002/kin.550160207, 1984.
- 30 Liu, Y.: Isoprene Photooxidation via the Hydroperoxyl Pathway, Doctoral dissertation, Harvard University, Graduate School of Arts & Sciences, 23 January. [online] Available from: <https://dash.harvard.edu/handle/1/14226050> (Accessed 29 January 2016), 2015.
- 35 Liu, Y., Brito, J., Dorris, M. R., Rivera Rios, J. C., Seco, R., Bates, K. H., Artaxo, P., Duvoisin, S., Keutsch, F. N., Kim, S., Goldstein, A. H., Guenther, A. B., Manzi, A. O., Souza, R. A. F., Springston, S. R., Watson, T. B., McKinney, K. A. and Martin, S. T.: Isoprene photochemistry over the Amazon rainforest, *Proc. Natl. Acad. Sci.*, 113(22), 6125–6130, doi:10.1073/pnas.1524136113, 2016.



- Liu, Y. J., Herdinger-Blatt, I., McKinney, K. A. and Martin, S. T.: Production of methyl vinyl ketone and methacrolein via the hydroperoxyl pathway of isoprene oxidation, *Atmos Chem Phys*, 13(11), 5715–5730, doi:10.5194/acp-13-5715-2013, 2013.
- 5 Loreto, F. and Fineschi, S.: Reconciling functions and evolution of isoprene emission in higher plants, *New Phytol.*, 206(2), 578–582, doi:10.1111/nph.13242, 2015.
- Loreto, F. and Sharkey, T. D.: A gas-exchange study of photosynthesis and isoprene emission in *Quercus rubra*, *Planta*, 182(4), 523–531, doi:10.1007/BF02341027, 1990.
- Loreto, F., Ciccioli, P., Cecinato, A., Brancaleoni, E., Frattoni, M., Fabozzi, C. and Tricoli, D.: Evidence of the Photosynthetic Origin of Monoterpenes Emitted by *Quercus ilex* L. Leaves by <sup>13</sup>C Labeling., *Plant Physiol.*, 110(4), 1317–1322, 1996.
- 10 Loreto, F., Ciccioli, P., Brancaleoni, E., Cecinato, A. and Frattoni, M.: Measurement of isoprenoid content in leaves of Mediterranean *Quercus* spp. by a novel and sensitive method and estimation of the isoprenoid partition between liquid and gas phase inside the leaves, *Plant Sci.*, 136(1), 25–30, doi:10.1016/S0168-9452(98)00092-2, 1998.
- Loreto, F., Barta, C., Brilli, F. and Nogues, I.: On the induction of volatile organic compound emissions by plants as consequence of wounding or fluctuations of light and temperature, *Plant Cell Environ.*, 29(9), 1820–1828, doi:10.1111/j.1365-3040.2006.01561.x, 2006.
- 15 Loreto, F., Bagnoli, F. and Fineschi, S.: One species, many terpenes: matching chemical and biological diversity, *Trends Plant Sci.*, 14(8), 416–420, doi:10.1016/j.tplants.2009.06.003, 2009.
- Macdonald, R. C. and Fall, R.: Acetone emission from conifer buds, *Phytochemistry*, 34(4), 991–994, doi:10.1016/S0031-9422(00)90700-3, 1993.
- 20 MacDonald, R. C. and Kimmerer, T. W.: Metabolism of Transpired Ethanol by Eastern Cottonwood (*Populus deltoides* Bartr.), *Plant Physiol.*, 102(1), 173–179, 1993.
- McKinney, K. A., Lee, B. H., Vasta, A., Pho, T. V. and Munger, J. W.: Emissions of isoprenoids and oxygenated biogenic volatile organic compounds from a New England mixed forest, *Atmos Chem Phys*, 11(10), 4807–4831, doi:10.5194/acp-11-4807-2011, 2011.
- 25 Misztal, P. K., Owen, S. M., Guenther, A. B., Rasmussen, R., Geron, C., Harley, P., Phillips, G. J., Ryan, A., Edwards, D. P., Hewitt, C. N., Nemitz, E., Siong, J., Heal, M. R. and Cape, J. N.: Large estragole fluxes from oil palms in Borneo, *Atmos Chem Phys*, 10(9), 4343–4358, doi:10.5194/acp-10-4343-2010, 2010.
- Misztal, P. K., Nemitz, E., Langford, B., Di Marco, C. F., Phillips, G. J., Hewitt, C. N., MacKenzie, A. R., Owen, S. M., Fowler, D., Heal, M. R. and Cape, J. N.: Direct ecosystem fluxes of volatile organic compounds from oil palms in South East Asia, *Atmos Chem Phys*, 11(17), 8995–9017, doi:10.5194/acp-11-8995-2011, 2011.
- 30 Misztal, P. K., Hewitt, C. N., Wildt, J., Blande, J. D., Eller, A. S. D., Fares, S., Gentner, D. R., Gilman, J. B., Graus, M., Greenberg, J., Guenther, A. B., Hansel, A., Harley, P., Huang, M., Jardine, K., Karl, T., Kaser, L., Keutsch, F. N., Kiendler-Scharr, A., Kleist, E., Lerner, B. M., Li, T., Mak, J., Nölscher, A. C., Schnitzhofer, R., Sinha, V., Thornton, B., Warneke, C., Wegener, F., Werner, C., Williams, J., Worton, D. R., Yassaa, N. and Goldstein, A. H.: Atmospheric benzenoid emissions from plants rival those from fossil fuels, *Sci. Rep.*, 5, 12064, doi:10.1038/srep12064, 2015.
- 35

- Moody, J. L., Munger, J. W., Goldstein, A. H., Jacob, D. J. and Wofsy, S. C.: Harvard Forest regional-scale air mass composition by Patterns in Atmospheric Transport History (PATH), *J. Geophys. Res. Atmospheres*, 103(D11), 13181–13194, doi:10.1029/98JD00526, 1998.
- 5 Müller, K., Haferkorn, S., Grabmer, W., Wisthaler, A., Hansel, A., Kreuzwieser, J., Cojocariu, C., Rennenberg, H. and Herrmann, H.: Biogenic carbonyl compounds within and above a coniferous forest in Germany, *Atmos. Environ.*, 40, Supplement 1, 81–91, doi:10.1016/j.atmosenv.2005.10.070, 2006.
- Müller, M., Mikoviny, T. and Wisthaler, A.: Detector aging induced mass discrimination and non-linearity effects in PTR-ToF MS, *Int. J. Mass Spectrom.*, 365–366, 93–97, doi:10.1016/j.ijms.2013.12.008, 2014.
- 10 Munger, J. W., Wofsy, S. C., Bakwin, P. S., Fan, S. M., Goulden, M. L., Daube, B. C., Goldstein, A. H., Moore, K. E. and Fitzjarrald, D. R.: Atmospheric deposition of reactive nitrogen oxides and ozone in a temperate deciduous forest and a subarctic woodland: 1. Measurements and mechanisms, *J. Geophys. Res. Atmospheres*, 101(D7), 12639–12657, doi:10.1029/96JD00230, 1996.
- 15 Muramoto, S., Matsubara, Y., Mwenda, C. M., Koeduka, T., Sakami, T., Tani, A. and Matsui, K.: Glutathionylation and Reduction of Methacrolein in Tomato Plants Account for Its Absorption from the Vapor Phase [OPEN], *Plant Physiol.*, 169(3), 1744–1754, doi:10.1104/pp.15.01045, 2015.
- Niinemets, Ü. and Reichstein, M.: Controls on the emission of plant volatiles through stomata: Differential sensitivity of emission rates to stomatal closure explained, *J. Geophys. Res. Atmospheres*, 108(D7), 4208, doi:10.1029/2002JD002620, 2003.
- 20 Oikawa, P. Y. and Lerdau, M. T.: Catabolism of volatile organic compounds influences plant survival, *Trends Plant Sci.*, 18(12), 695–703, doi:10.1016/j.tplants.2013.08.011, 2013.
- Omasa, K., Tobe, K., Hosomi, M. and Kobayashi, M.: Absorption of Ozone and Seven Organic Pollutants by *Populus nigra* and *Camellia sasanqua*, *Environ. Sci. Technol.*, 34(12), 2498–2500, doi:10.1021/es991285m, 2000.
- Omasa, K., Tobe, K. and Kondo, T.: Absorption of Organic and Inorganic Air Pollutants by Plants, in *Air Pollution and Plant Biotechnology*, edited by K. Omasa, H. Saji, S. Youssefian, and N. Kondo, pp. 155–178, Springer Japan. [online] Available from: [http://link.springer.com/chapter/10.1007/978-4-431-68388-9\\_8](http://link.springer.com/chapter/10.1007/978-4-431-68388-9_8) (Accessed 18 May 2016), 2002.
- 25 Owen, S. M., Harley, P., Guenther, A. and Hewitt, C. N.: Light dependency of VOC emissions from selected Mediterranean plant species, *Atmos. Environ.*, 36(19), 3147–3159, doi:10.1016/S1352-2310(02)00235-2, 2002.
- Pichersky, E., Noel, J. P. and Dudareva, N.: Biosynthesis of Plant Volatiles: Nature's Diversity and Ingenuity, *Science*, 311(5762), 808–811, doi:10.1126/science.1118510, 2006.
- 30 Pinho, P. G., Pio, C. A. and Jenkin, M. E.: Evaluation of isoprene degradation in the detailed tropospheric chemical mechanism, MCM-v3, using environmental chamber data, *Atmos. Environ.*, 39(7), 1303–1322, doi:10.1016/j.atmosenv.2004.11.014, 2005.
- Pöschl, U., Williams, J., Hoor, P., Fischer, H., Crutzen, P. J., Warneke, C., Holzinger, R., Hansel, A., Jordan, A., Lindinger, W., Scheeren, H. A., Peters, W. and Lelieveld, J.: High Acetone Concentrations throughout the 0–12 km Altitude Range over the Tropical Rainforest in Surinam, *J. Atmospheric Chem.*, 38(2), 115–132, doi:10.1023/A:1006370600615, 2001.
- 35 Rasmussen, R. A. and Khalil, M. a. K.: Atmospheric benzene and toluene, *Geophys. Res. Lett.*, 10(11), 1096–1099, doi:10.1029/GL010i011p01096, 1983.



- Rinne, J., Taipale, R., Markkanen, T., Ruuskanen, T. M., Hellén, H., Kajos, M. K., Vesala, T. and Kulmala, M.: Hydrocarbon fluxes above a Scots pine forest canopy: measurements and modeling, *Atmos Chem Phys*, 7(12), 3361–3372, doi:10.5194/acp-7-3361-2007, 2007.
- 5 Rivera Rios, J. C., Nguyen, T. B., Crounse, J. D., Jud, W., St. Clair, J. M., Mikoviny, T., Gilman, J. B., Lerner, B. M., Kaiser, J. B., de Gouw, J., Wisthaler, A., Hansel, A., Wennberg, P. O., Scinfeld, J. H. and Keutsch, F. N.: Conversion of hydroperoxides to carbonyls in field and laboratory instrumentation: Observational bias in diagnosing pristine versus anthropogenically controlled atmospheric chemistry, *Geophys. Res. Lett.*, 41(23), 2014GL061919, doi:10.1002/2014GL061919, 2014.
- 10 Rottenberger, S., Kuhn, U., Wolf, A., Schebeske, G., Oliva, S. T., Tavares, T. M. and Kesselmeier, J.: Exchange of Short-Chain Aldehydes Between Amazonian Vegetation and the Atmosphere, *Ecol. Appl.*, 14(sp4), 247–262, doi:10.1890/01-6027-2004.
- Schade, G. W. and Goldstein, A. H.: Fluxes of oxygenated volatile organic compounds from a ponderosa pine plantation, *J. Geophys. Res. Atmospheres*, 106(D3), 3111–3123, doi:10.1029/2000JD900592, 2001.
- 15 Schade, G. W. and Goldstein, A. H.: Seasonal measurements of acetone and methanol: Abundances and implications for atmospheric budgets, *Glob. Biogeochem. Cycles*, 20(1), GB1011, doi:10.1029/2005GB002566, 2006.
- Schade, G. W., Solomon, S. J., Dellwik, E., Pilegaard, K. and Ladstätter-Weissenmayer, A.: Methanol and other VOC fluxes from a Danish beech forest during late springtime, *Biogeochemistry*, 106(3), 337–355, doi:10.1007/s10533-010-9515-5, 2011.
- Schneider, C. A., Rasband, W. S. and Eliceiri, K. W.: NIH Image to ImageJ: 25 years of image analysis, *Nat. Methods*, 9(7), 671–675, doi:10.1038/nmeth.2089, 2012.
- 20 Schürmann, W., Ziegler, H., Kotzias, D., Schönwitz, R. and Steinbrecher, R.: Emission of biosynthesized monoterpenes from needles of Norway Spruce, *Naturwissenschaften*, 80(6), 276–278, doi:10.1007/BF01135913, 1993.
- Seo, R., Karl, T., Guenther, A., Hosman, K. P., Pallardy, S. G., Gu, L., Geron, C., Harley, P. and Kim, S.: Ecosystem scale volatile organic compound fluxes during an extreme drought in a broadleaf temperate forest of the Missouri Ozarks (central USA), *Glob. Change Biol.*, 21(10), 3657–3674, doi:10.1111/gcb.12980, 2015.
- 25 Sharkey, T. D., Singaas, E. L., Vanderveer, P. J. and Geron, C.: Field measurements of isoprene emission from trees in response to temperature and light, *Tree Physiol.*, 16(7), 649–654, 1996.
- Shimoda, K., Kubota, N., Hamada, H., Yamane, S. and Hirata, T.: Asymmetric Transformation of Enones with *Synechococcus* sp. PCC 7942, *Bull. Chem. Soc. Jpn.*, 77(12), 2269–2272, doi:10.1246/besj.77.2269, 2004.
- 30 Spanel, P. and Smith, D.: SIFT studies of the reactions of H<sub>3</sub>O<sup>+</sup>, NO<sup>+</sup> and O<sub>2</sub><sup>+</sup> with a series of alcohols, *Int. J. Mass Spectrom. Ion Process.*, 167, 375–388, doi:10.1016/S0168-1176(97)00085-2, 1997.
- Spanel, P. and Smith, D.: Selected ion flow tube studies of the reactions of H<sub>3</sub>O<sup>+</sup>, NO<sup>+</sup>, and O<sub>2</sub><sup>(+)</sup> with several aromatic and aliphatic hydrocarbons, *Int. J. Mass Spectrom.*, 181, 1–10, 1998.
- 35 Spirig, C., Neftel, A., Ammann, C., Dommen, J., Grabmer, W., Thielmann, A., Schaub, A., Beauchamp, J., Wisthaler, A. and Hansel, A.: Eddy covariance flux measurements of biogenic VOCs during ECHO 2003 using proton transfer reaction mass spectrometry, *Atmos Chem Phys*, 5(2), 465–481, doi:10.5194/acp-5-465-2005, 2005.

- Steinbrecher, R., Smiatek, G., Köble, R., Seufert, G., Theloke, J., Hauff, K., Ciccioli, P., Vautard, R. and Curci, G.: Intra- and inter-annual variability of VOC emissions from natural and semi-natural vegetation in Europe and neighbouring countries, *Atmos. Environ.*, 43(7), 1380–1391, doi:10.1016/j.atmosenv.2008.09.072, 2009.
- 5 Su, T.: Parametrization of kinetic energy dependences of ion-polar molecule collision rate constants by trajectory calculations, *J. Chem. Phys.*, 100(6), 4703, doi:10.1063/1.466255, 1994.
- Tang, Y. X. and Suga, T.: The International Journal of Plant Biochemistry Biotransformation of  $\alpha$ - and  $\beta$ -ionones by immobilized cells of *Nicotiana tabacum*, *Phytochemistry*, 37(3), 737–740, doi:10.1016/S0031-9422(00)90349-2, 1994.
- Tani, A. and Hewitt, C. N.: Uptake of Aldehydes and Ketones at Typical Indoor Concentrations by Houseplants, *Environ. Sci. Technol.*, 43(21), 8338–8343, doi:10.1021/es9020316, 2009.
- 10 Titzmann, T., Graus, M., Müller, M., Hansel, A. and Ostermann, A.: Improved peak-analysis of signals based on counting systems: Illustrated for proton-transfer reaction time-of-flight mass spectrometry, *Int. J. Mass Spectrom.*, 295(1–2), 72–77, doi:10.1016/j.ijms.2010.07.009, 2010.
- Ugrekhelidze, D., Korte, F. and Kvesitadze, G.: Uptake and Transformation of Benzene and Toluene by Plant Leaves, *Ecotoxicol. Environ. Saf.*, 37(1), 24–29, doi:10.1006/eesa.1996.1512, 1997.
- 15 Ugrekhelidze, D. S.: *Metabolism of Exogenous Alkanes and Aromatic Hydrocarbons in Plants*, Metsniereba, Tbilisi., 1976.
- Urbanski, S., Barford, C., Wofsy, S., Kucharik, C., Pyle, E., Budney, J., McKain, K., Fitzjarrald, D., Czikowsky, M. and Munger, J. W.: Factors controlling  $\text{CO}_2$  exchange on timescales from hourly to decadal at Harvard Forest, *J. Geophys. Res.*, 112(G2), doi:10.1029/2006JG000293, 2007.
- Velikova, V., Fares, S. and Loreto, F.: Isoprene and nitric oxide reduce damages in leaves exposed to oxidative stress, *Plant Cell Environ.*, 31(12), 1882–1894, doi:10.1111/j.1365-3040.2008.01893.x, 2008.
- 20 Vickers, C. E., Possell, M., Cojocariu, C. I., Velikova, V. B., Laothawornkitkul, J., Ryan, A., Mullineaux, P. M. and Nicholas Hewitt, C.: Isoprene synthesis protects transgenic tobacco plants from oxidative stress, *Plant Cell Environ.*, 32(5), 520–531, doi:10.1111/j.1365-3040.2009.01946.x, 2009.
- Vollenweider, S., Weber, H., Stolz, S., Chételat, A. and Farmer, E. E.: Fatty acid ketodienes and fatty acid ketotrienes: Michael addition acceptors that accumulate in wounded and diseased *Arabidopsis* leaves, *Plant J. Cell Mol. Biol.*, 24(4), 467–476, 2000.
- 25 Wanner, P. and Tressl, R.: Purification and characterization of two enone reductases from *Saccharomyces cerevisiae*, *Eur. J. Biochem.*, 255(1), 271–278, doi:10.1046/j.1432-1327.1998.2550271.x, 1998.
- Warneke, C., de Gouw, J. A., Kuster, W. C., Goldan, P. D. and Fall, R.: Validation of Atmospheric VOC Measurements by Proton-Transfer Reaction Mass Spectrometry Using a Gas-Chromatographic Preseparation Method, *Environ. Sci. Technol.*, 37(11), 2494–2501, doi:10.1021/es026266i, 2003.
- 30 White, M. L., Russo, R. S., Zhou, Y., Ambrose, J. L., Haase, K., Frinak, E. K., Varner, R. K., Wingenter, O. W., Mao, H., Talbot, R. and Sive, B. C.: Are biogenic emissions a significant source of summertime atmospheric toluene in the rural Northeastern United States?, *Atmospheric Chem. Phys.*, 9(1), 81–92, doi:10.5194/acp-9-81-2009, 2009.

Winters, A. J., Adams, M. A., Bleby, T. M., Rennenberg, H., Steigner, D., Steinbrecher, R. and Kreuzwieser, J.: Emissions of isoprene, monoterpene and short-chained carbonyl compounds from *Eucalyptus* spp. in southern Australia, *Atmos. Environ.*, 43(19), 3035–3043, doi:10.1016/j.atmosenv.2009.03.026, 2009.

5 Wohlfahrt, G., Brilli, F., Hörtnagl, L., Xu, X., Bingemer, H., Hansel, A. and Loreto, F.: Carbonyl sulfide (COS) as a tracer for canopy photosynthesis, transpiration and stomatal conductance: potential and limitations†, *Plant Cell Environ.*, 35(4), 657–667, doi:10.1111/j.1365-3040.2011.02451.x, 2012.

10 Yáñez-Serrano, A. M., Nölseher, A. C., Bourtsoukidis, E., Derstroff, B., Zannoni, N., Gros, V., Lanza, M., Brito, J., Noe, S. M., House, E., Hewitt, C. N., Langford, B., Nemitz, E., Behrendt, T., Williams, J., Artaxo, P., Andreae, M. O. and Kesselmeier, J.: Atmospheric mixing ratios of methyl ethyl ketone (2-butanone) in tropical, boreal, temperate and marine environments, *Atmospheric Chem. Phys. Discuss.*, 0, 1–32, doi:10.5194/acp-2016-317, 2016.

## Tables

**Table 1.** Average measured emission and deposition rates at branch-scale in the upper canopy. August 14 - 25. Data are reported as mean  $\pm$  standard deviation. Maximum emission and deposition rates are also reported as well as an indication of their statistical significance (\*:  $p < 0.05$ ; n.s.: not significant).

|                  | Average daytime emission                                          | Average nighttime emission                                        | Average 24-hour emission                                          | Maximum emission rate (1 h integration)                           | Maximum deposition rate (1 h integration)                         |
|------------------|-------------------------------------------------------------------|-------------------------------------------------------------------|-------------------------------------------------------------------|-------------------------------------------------------------------|-------------------------------------------------------------------|
|                  | [nmol <sub>4</sub> m <sup>-2</sup> <sub>4</sub> h <sup>-1</sup> ] | [nmol <sub>4</sub> m <sup>-2</sup> <sub>4</sub> h <sup>-1</sup> ] | [nmol <sub>4</sub> m <sup>-2</sup> <sub>4</sub> h <sup>-1</sup> ] | [nmol <sub>4</sub> m <sup>-2</sup> <sub>4</sub> h <sup>-1</sup> ] | [nmol <sub>4</sub> m <sup>-2</sup> <sub>4</sub> h <sup>-1</sup> ] |
| Benzaldehyde     | 0.6 $\pm$ 0.3                                                     | 0.2 $\pm$ 0.1                                                     | 0.4 $\pm$ 0.2                                                     | 2.2 *                                                             | -1.9 *                                                            |
| Acetaldehyde     | 50 $\pm$ 30                                                       | 11 $\pm$ 6                                                        | 20 $\pm$ 10                                                       | 170 *                                                             | -20 *                                                             |
| MEK              | 30 $\pm$ 10                                                       | 4 $\pm$ 3                                                         | 15 $\pm$ 7                                                        | 140 *                                                             | 0                                                                 |
| Acetone          | 90 $\pm$ 50                                                       | 20 $\pm$ 30                                                       | 50 $\pm$ 30                                                       | 330 *                                                             | 0                                                                 |
| MeOH             | 1000 $\pm$ 800                                                    | 300 $\pm$ 100                                                     | 600 $\pm$ 400                                                     | 3000 *                                                            | 0                                                                 |
| ISOP             | <del>0.2 <math>\pm</math> 0.1</del> $\times 10^{54}$              | <u>200.0 <math>\pm</math> 200.0</u> $\times 10^5$                 | <del>0.10 <math>\pm</math> 0.7</del> $\times 10^{54}$             | 1.0 $\times 10^5$ *                                               | <del>0.0 <math>\times 10^5</math></del> <u>0</u>                  |
| Monoterpenes     | 20 $\pm$ 10                                                       | 2 $\pm$ 2                                                         | 10 $\pm$ 7                                                        | 183 *                                                             | 0                                                                 |
| MACR+MVK+ISOPOOH | -                                                                 | 0 $\pm$ 2                                                         | -                                                                 | 7 n.s.                                                            | -4 *                                                              |

10

15

**Table 2.** Average measured emission and deposition rates at branch-scale in the upper canopy. August 25 - September 1. Data are reported as mean  $\pm$  standard deviation. Maximum emission and deposition rates are also reported as well as an indication of their statistical significance (\*:  $p < 0.05$ ; n.s.: not significant).

|                  | Average daytime emission                             | Average nighttime emission                    | Average 24-hour emission                             | Maximum emission rate (1 h integration)    | Maximum deposition rate (1 h integration)  |
|------------------|------------------------------------------------------|-----------------------------------------------|------------------------------------------------------|--------------------------------------------|--------------------------------------------|
|                  | [nmol $\mu\text{m}^{-2}$ $\text{h}^{-1}$ ]           | [nmol $\mu\text{m}^{-2}$ $\text{h}^{-1}$ ]    | [nmol $\mu\text{m}^{-2}$ $\text{h}^{-1}$ ]           | [nmol $\mu\text{m}^{-2}$ $\text{h}^{-1}$ ] | [nmol $\mu\text{m}^{-2}$ $\text{h}^{-1}$ ] |
| Benzaldehyde     | -1 $\pm$ 2                                           | 0 $\pm$ 1                                     | -1 $\pm$ 2                                           | 0.5 *                                      | -7 *                                       |
| Acetaldehyde     | 10 $\pm$ 40                                          | -1 $\pm$ 10                                   | 3 $\pm$ 18                                           | 100 *                                      | -40 *                                      |
| MEK              | 60 $\pm$ 20                                          | 7 $\pm$ 7                                     | 30 $\pm$ 20                                          | 460 *                                      | 0                                          |
| Acetone          | 50 $\pm$ 20                                          | 10 $\pm$ 10                                   | 30 $\pm$ 20                                          | 340 *                                      | 0                                          |
| MeOH             | 1000 $\pm$ 1000                                      | 300 $\pm$ 200                                 | 700 $\pm$ 600                                        | 3000 *                                     | 0                                          |
| ISOP             | <del>0.4 <math>\pm</math> 0.4</del> $\times 10^{54}$ | <u>200.0</u> $\pm$ <u>100.0</u> $\times 10^5$ | <del>0.2 <math>\pm</math> 0.2</del> $\times 10^{54}$ | 3.2 $\times 10^5$ *                        | <del>0.0</del> $\times 10^5$               |
| Monoterpenes     | 50 $\pm$ 50                                          | 20 $\pm$ 10                                   | 40 $\pm$ 40                                          | 1370 *                                     | -50 n.s.                                   |
| MACR+MVK+ISOPOOH | -                                                    | -6 $\pm$ 8                                    | -                                                    | 0                                          | -23 *                                      |

5

**Table 3.** Summary of the ancillary experiments: Fumigation of forest red oak upper canopy branches with VOCs.

|         | Henry Law Constant (water/air) $H^{\text{cp}}$ at $T^{\ominus}$ | VOC fumigation concentration range | Daytime deposition | Nighttime deposition |
|---------|-----------------------------------------------------------------|------------------------------------|--------------------|----------------------|
|         | [mol $\mu\text{m}^{-3}$ $\text{Pa}^{-1}$ ]                      | [ppbv]                             |                    |                      |
| MVK     | $2.6 \cdot 10^{-1}$                                             | 0 - 70                             | YES                | YES                  |
| MACR    | $4.8 \cdot 10^{-2}$                                             | 0 - 50                             | YES                | YES                  |
| ISOP    | $1.3 \cdot 10^{-4}$                                             | 0 - 700                            | -                  | -                    |
| ACETONE | $2.7 \cdot 10^{-1}$                                             | 0 - 70                             | -                  | -                    |
| MeOH    | 2.0                                                             | 0 - 70                             | YES                | YES                  |

## Figure captions

**Figure 1.** Diel average measured mixing ratios and fluxes in enclosures containing upper canopy red oak branches at Harvard Forest. Mixing ratio of the inflow ambient air and of the outflow air are shown in red and black, respectively. Diel average temperature and PAR during the measurement period are also shown. Error bars represent standard errors of the data points in each time interval.

**Figure 2.** Average daytime and nighttime vertical concentration profiles. Measured VOC concentrations at various heights within and above canopy are reported. Horizontal bars represent standard deviations.

**Figure 3.** Example of branch-level VOC flux measured as a function of MVK fumigation mixing ratio during daytime. The concomitant MVK uptake and emission of MVK reduction products (namely MEK, 3-buten-2-ol and 2-butanol) implies plant detoxification of MVK. Linear fit parameters are the following: MEK ( $R^2=0.954$ ;  $y=0.0249x+0.0869$ ); 2-butanol ( $R^2=0.928$ ;  $y=0.0031x+0.0226$ ); 3-buten-2-ol ( $R^2=0.956$ ;  $y=0.0102x-0.0102$ ); MVK ( $R^2=0.991$ ;  $y=-0.0293x-0.0279$ ).

**Figure 4.** Scatter plot of branch-level MEK fluxes versus MACR+MVK+ISOPOOH fluxes during darkness in the period 21-25 August. Linear fit parameters are the following:  $R^2=0.401$ ;  $y=-1.44x-0.24$ .

**Figure 5.** Example of benzaldehyde daily pattern for a day when benzaldehyde emission was detected. Measurements correspond to three different red oak upper canopy branches.

**Figure 6.** Flux measured as a function of mixing ratio for benzaldehyde during daytimes of the whole branch-level measurement campaign. Black triangles represent the period 25 August - 1 September, when deposition dominated, and grey dots correspond to the period 14-25 August, where mostly emission was measured. Linear fit parameters are the following:  $R^2=0.701$ ;  $y=-75.59x+1.22$ .

**Figure 7.** Example of enclosure flux measured as a function of fumigation mixing ratio for methanol in the field.

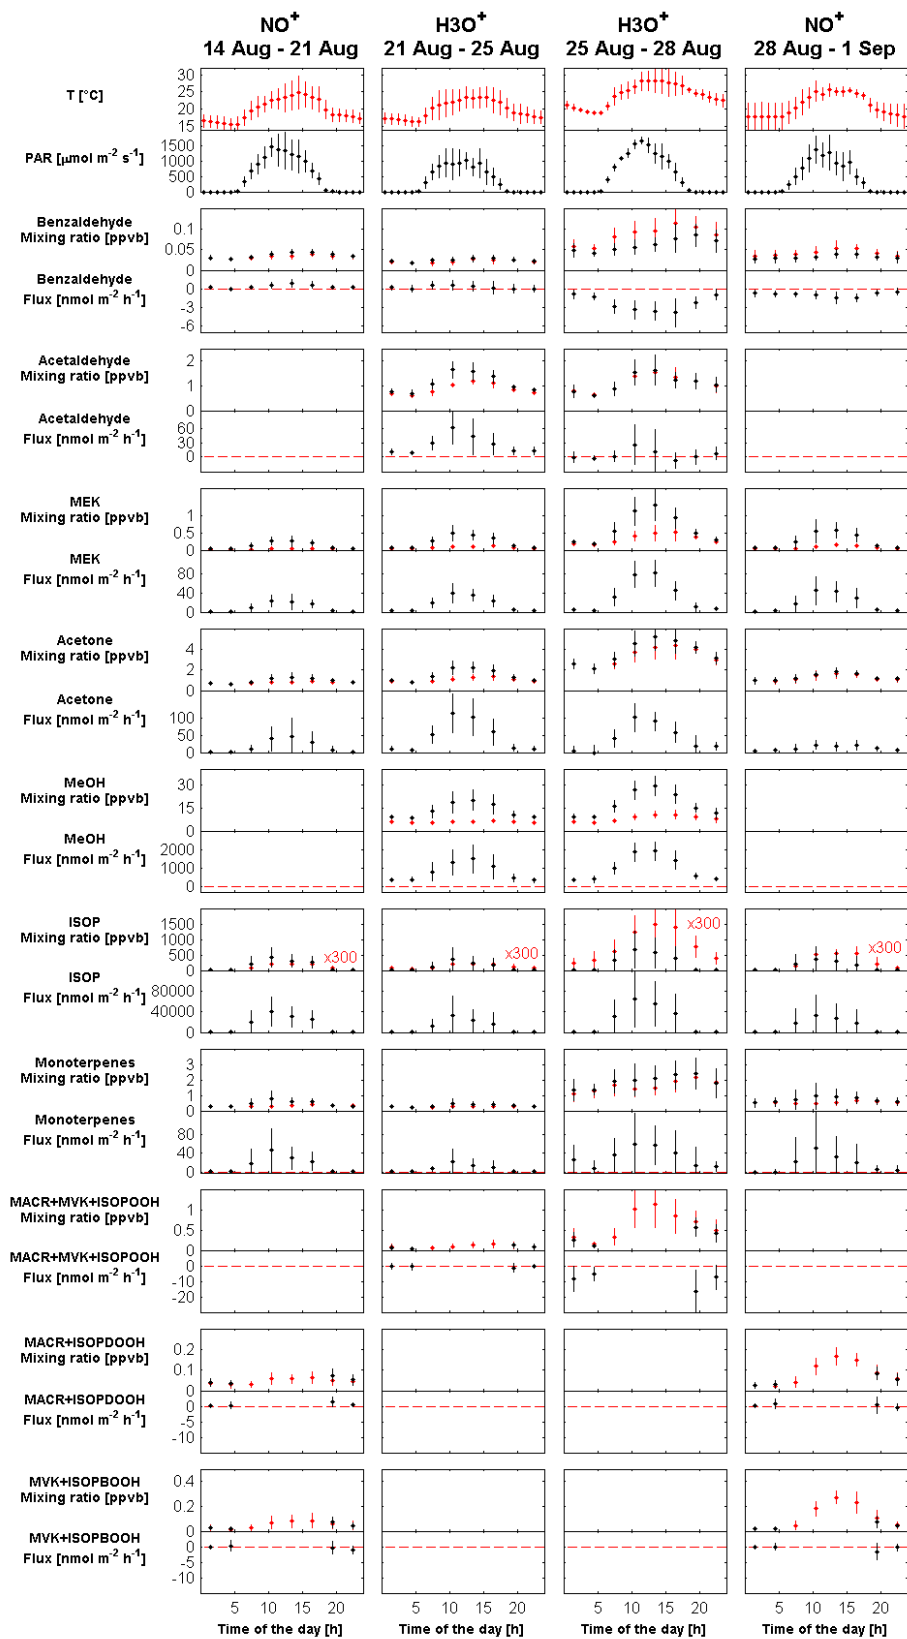

**Fig01**

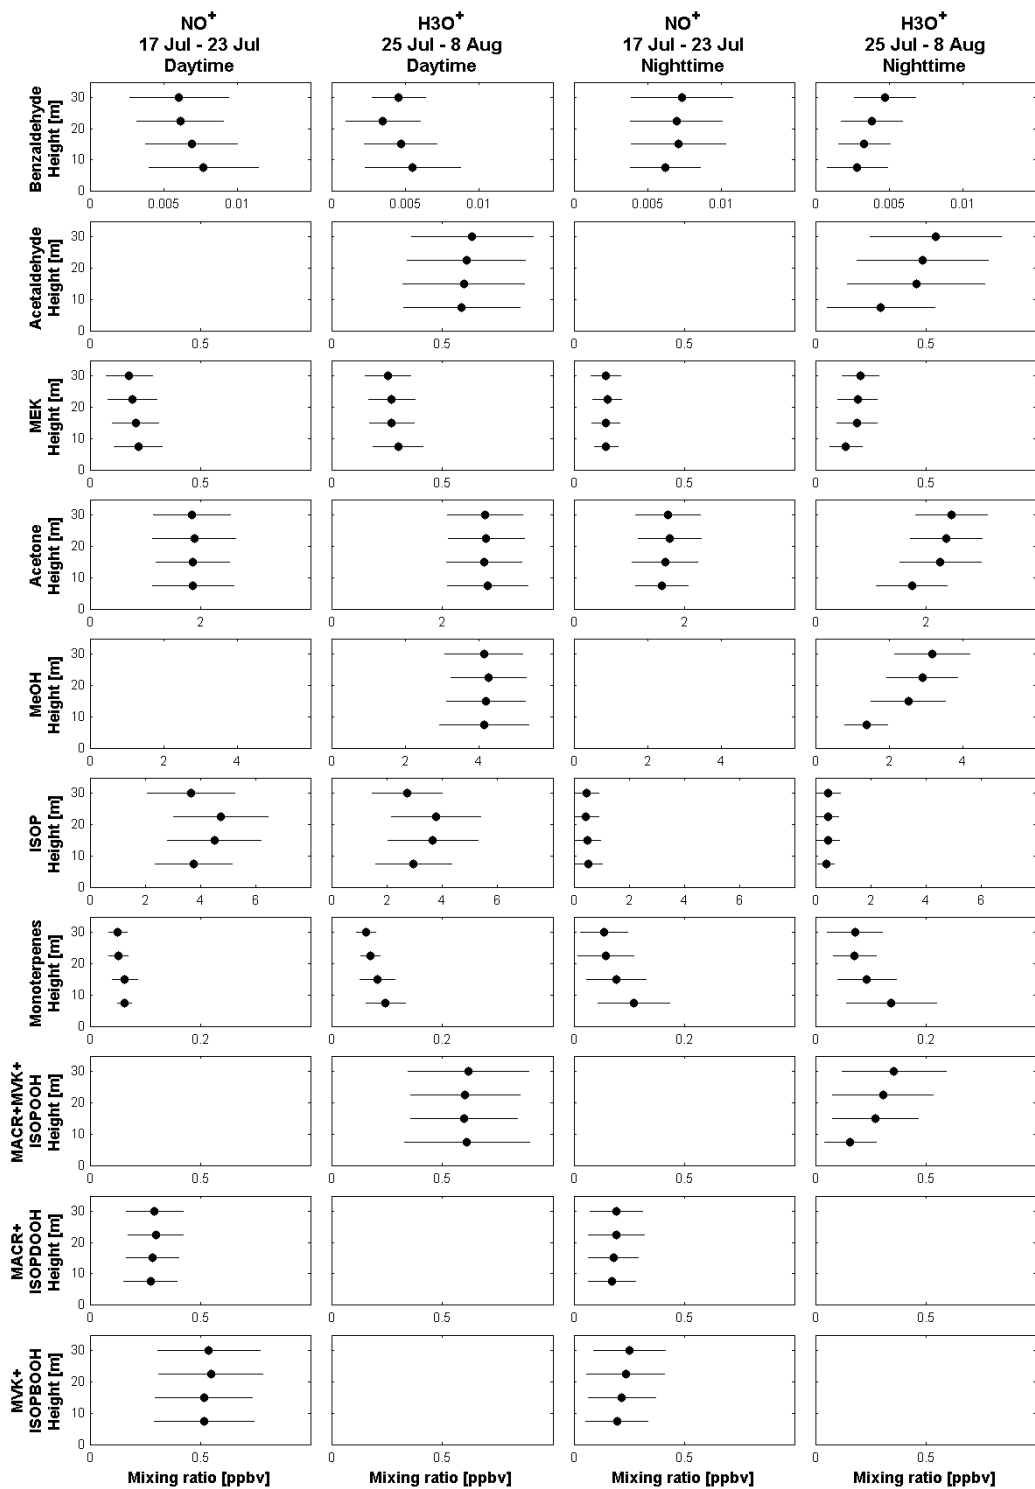

**Fig02**



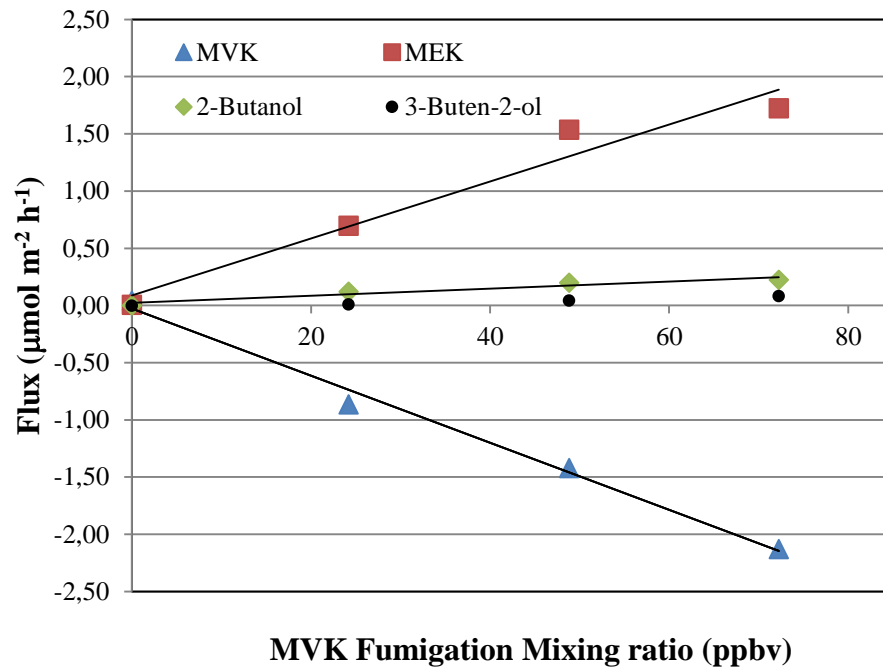

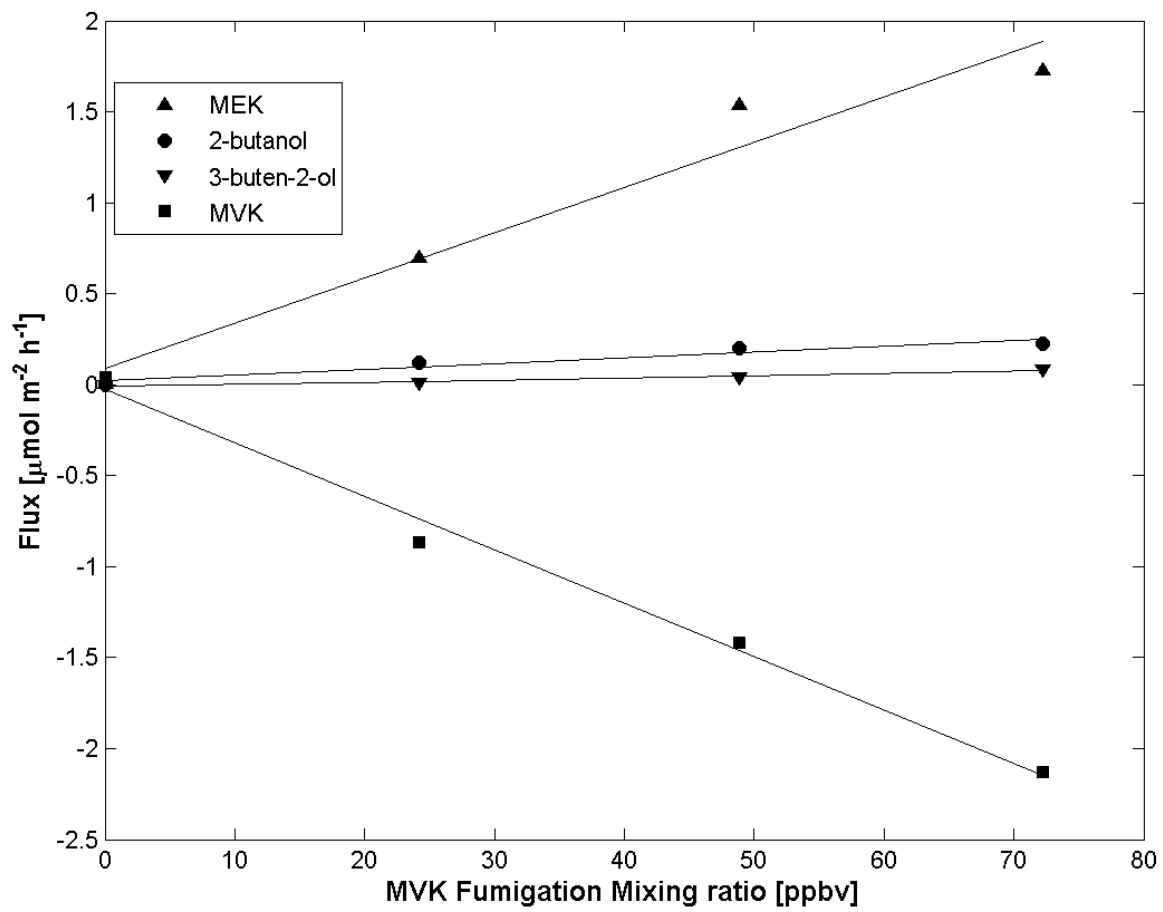

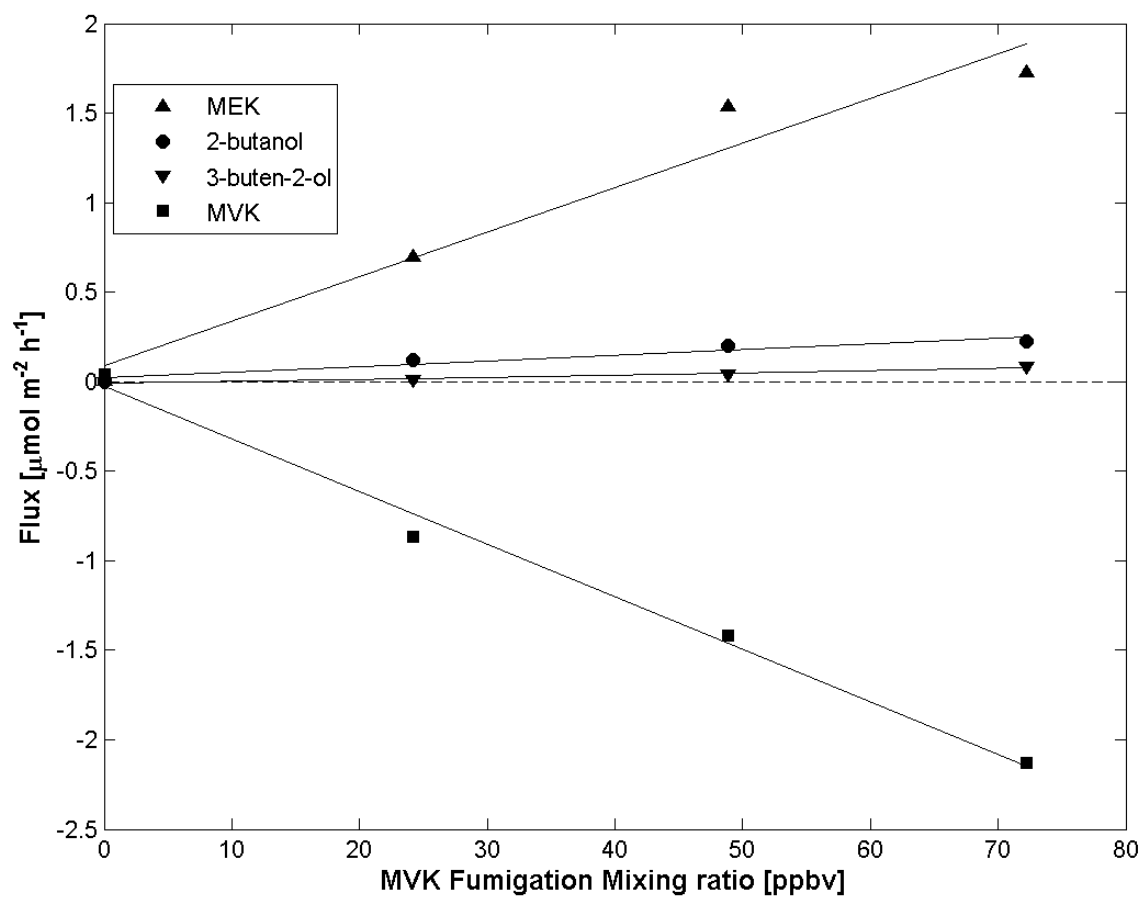

**Fig03**

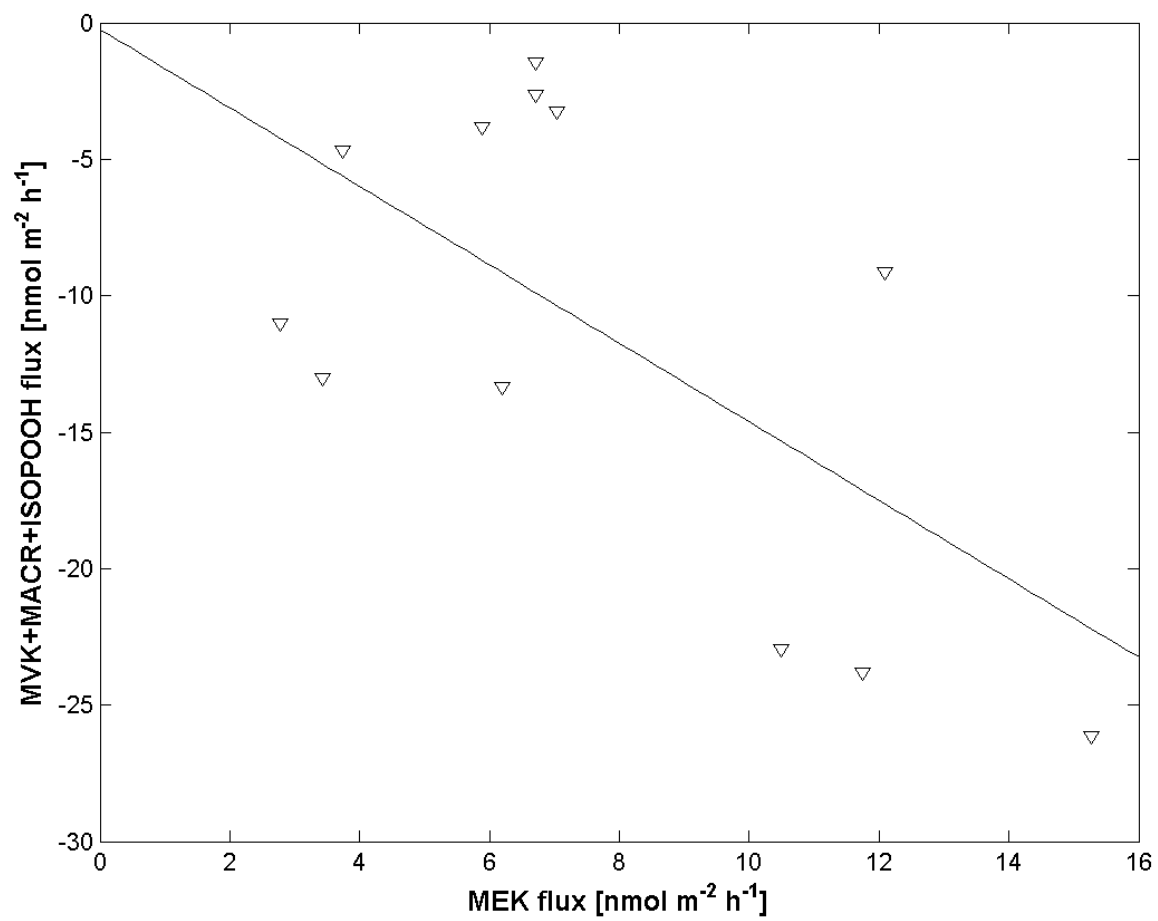

**Fig04**

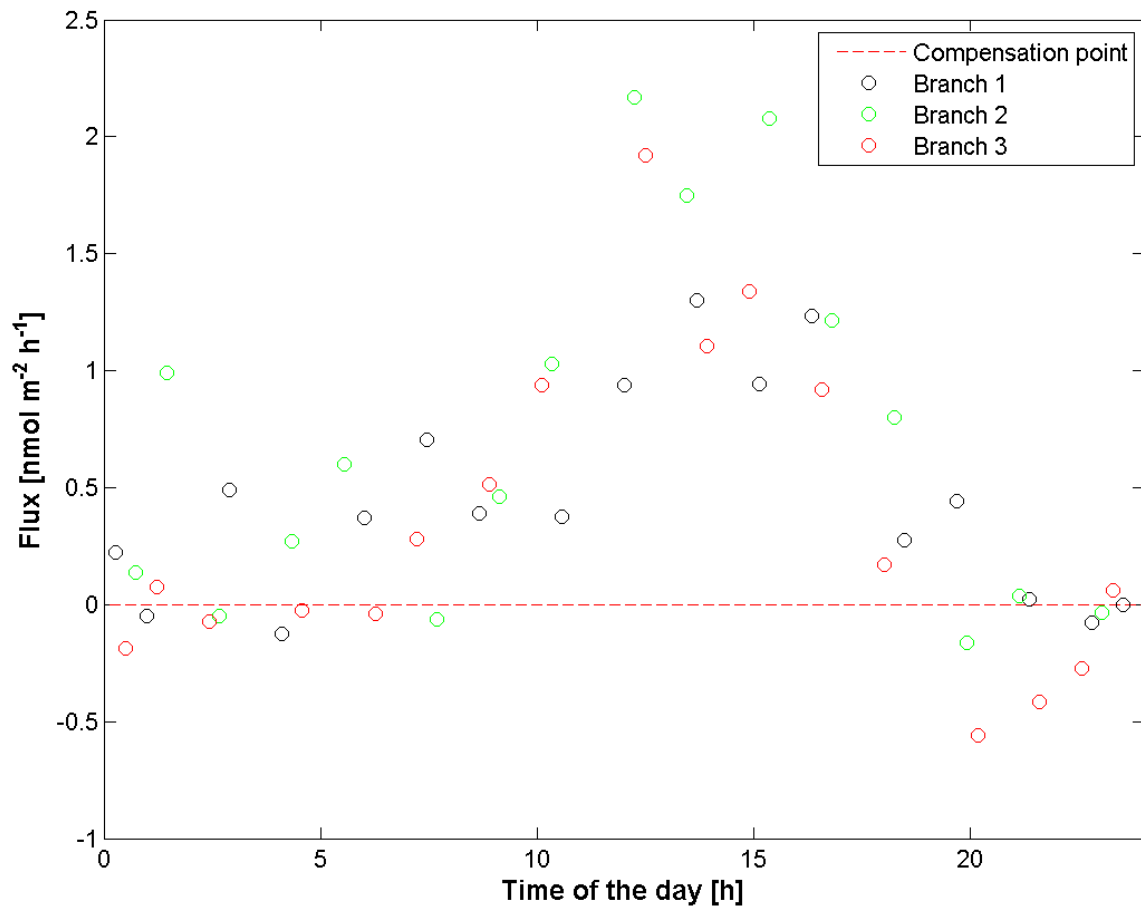

**Fig05**

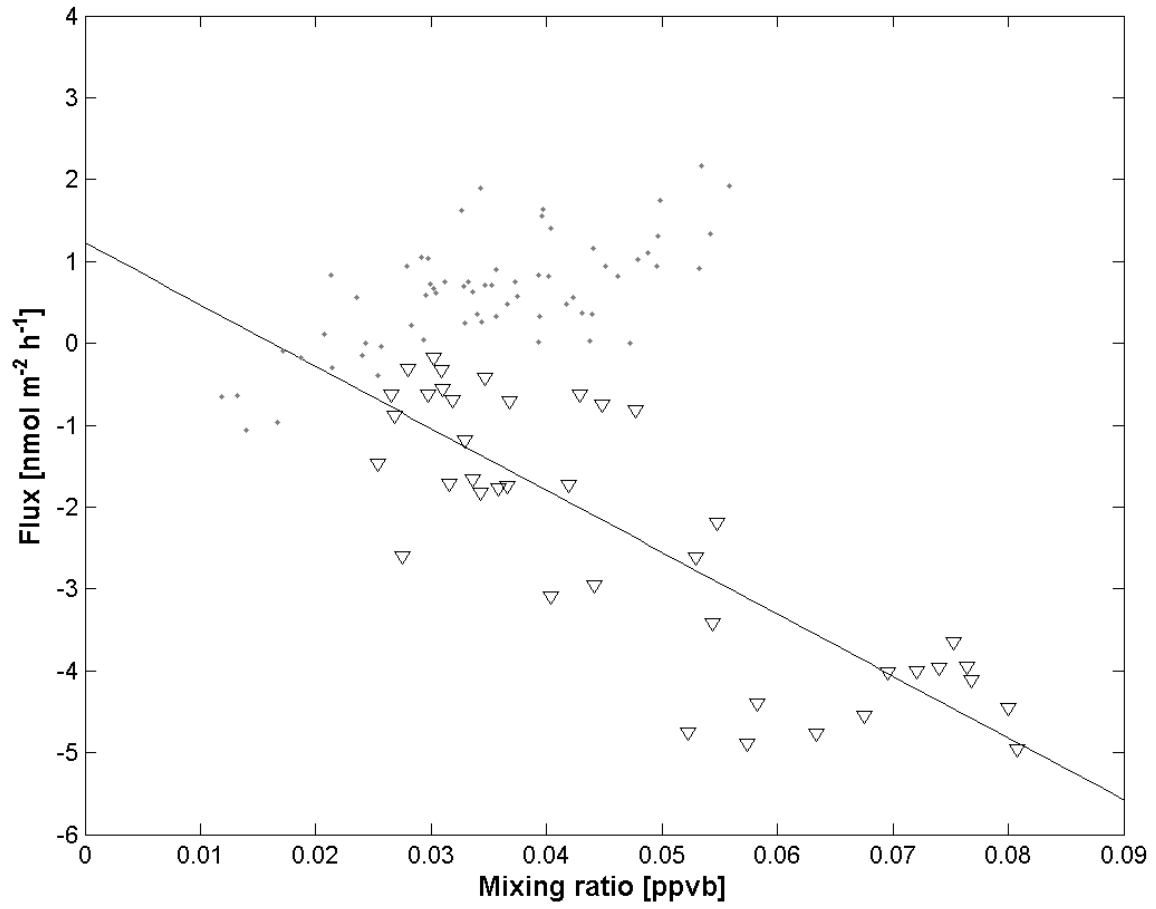

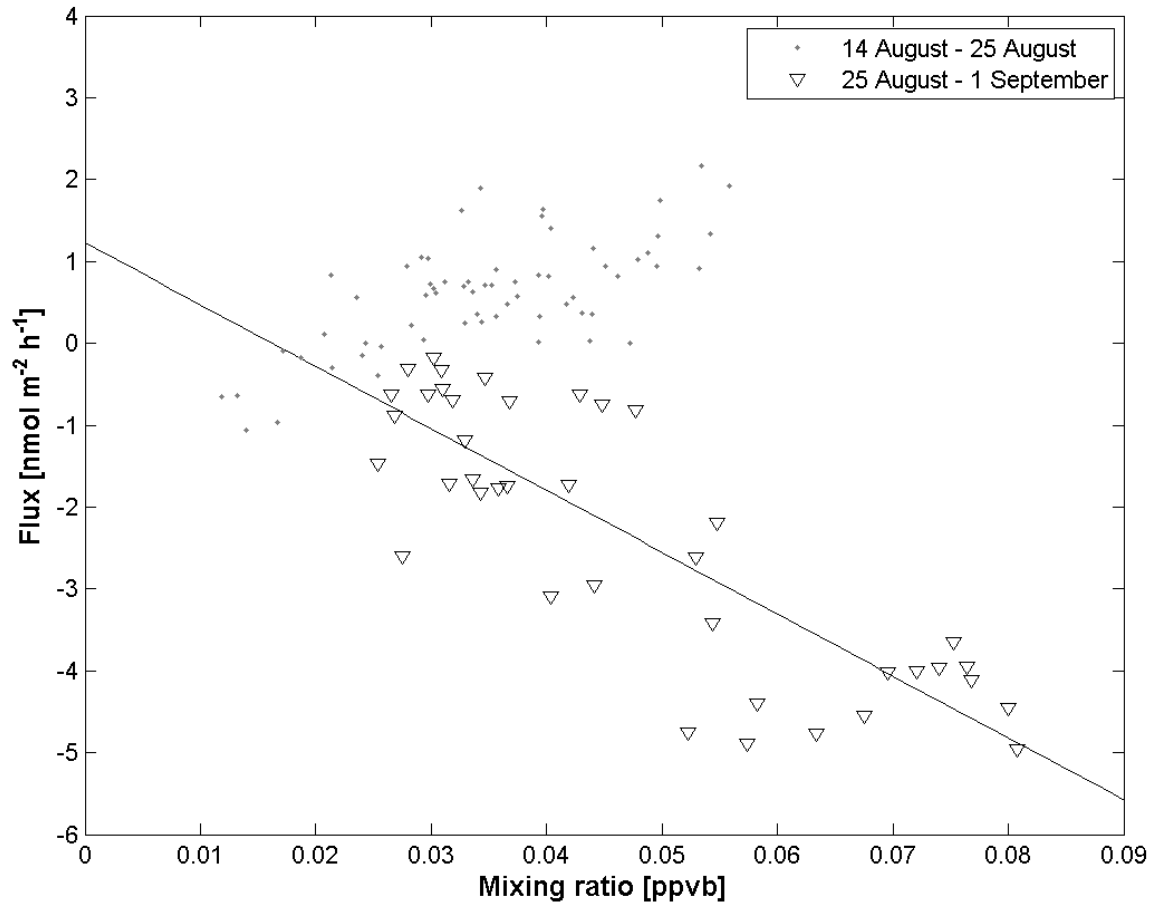

**Fig06**

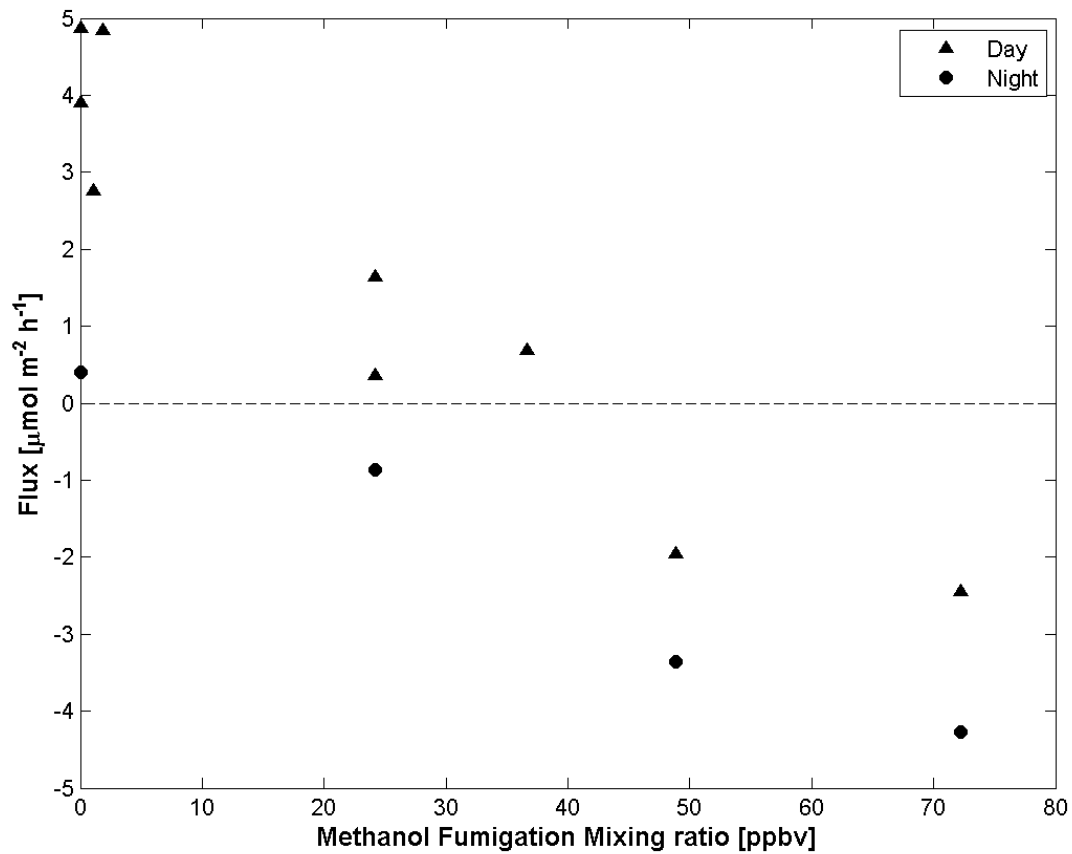

### MeOH - Tree 2B

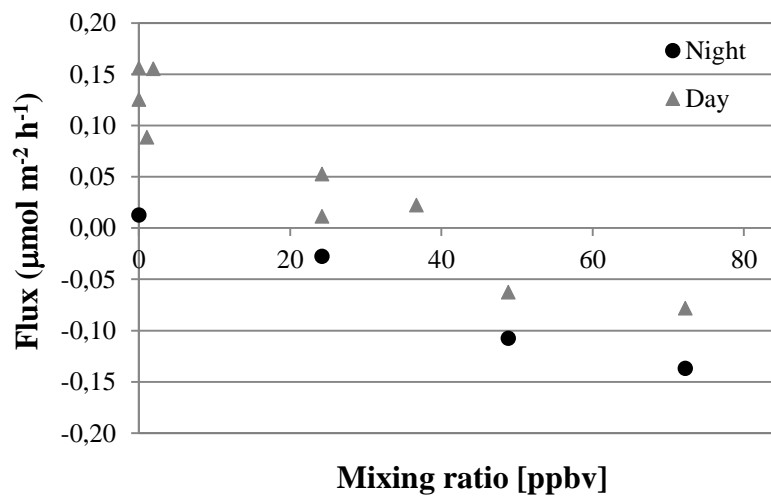



**Fig07**

## S.1 PTR/SRI-ToF-MS operation and data analysis

VOC measurements were performed by a PTR/SRI-ToF-MS 8000 (Ionicon Analytik GmbH, Innsbruck Austria) equipped with a switchable reagent ion system (Jordan et al., 2009), allowing either  $\text{NO}^+$  or  $\text{H}_3\text{O}^+$  primary ion chemistry.

5 In  $\text{H}_3\text{O}^+$  mode the drift tube conditions were: 2.19 mbar drift pressure, 542 V drift voltage, and 60 °C drift tube temperature. The resulting  $E/N$  ratio was ca. 125 Townsend (Td) ( $N$  corresponding to the gas number density and  $E$  to the electric field strength; 1 Td= $10^{-17}$  Vcm<sup>2</sup>). The PTR-ToF-MS ion source produces  $\text{H}_3\text{O}^+$  primary ions at high purity, with a fraction of the spurious primary ions  $\text{NO}_+$  and  $\text{O}_2^+$  of 0.04-0.3% and 0.8-1.2%, respectively, with respect to the  $\text{H}_3\text{O}^+$  ion signal. The primary ion signal was  $1.1 \cdot 10^6$  cps and the percentage of first water clusters was about 19%. In  $\text{NO}^+$  mode the drift tube conditions were: 2.21 mbar drift pressure, 296 V drift voltage, 90 °C drift tube temperature. The resulting  $E/N$  ratio was ca. 74 Townsend (Td). The primary ion signal was  $1.2 \cdot 10^6$  cps. During the measurements the fraction of the spurious primary ions  $\text{NO}_2^+$ ,  $\text{O}_2^+$  and  $\text{H}_3\text{O}^+$  were 1.9-2.3 %, 0.1-0.5 % and 0.1-0.3 % respectively, relative to the  $\text{NO}^+$  signal. A time-of-flight (ToF) mass analyzer operated in its standard configuration (V mode) was used to separate and detect the ions exiting the drift region. The sampling time per bin of ToF acquisition was 0.1 ns, amounting to 350000 bins for a  $m/z$  spectrum ranging up to  $m/z = 400$ .

### 20 S.1.1 $\text{NO}^+$ chemistry in SRI-ToF-MS instrument

Previous ion chemistry investigations (Amelynck et al., 2005; Jordan et al., 2009; Knighton et al., 2009; Spanel and Smith, 1998) employing  $\text{NO}^+$  as primary ion have shown that four reaction pathways dominate. They feature charge transfer,

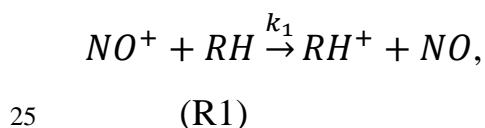

hydride ion transfer,

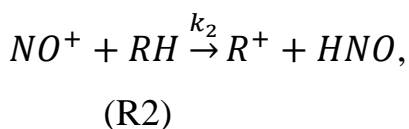

hydroxide ion transfer,

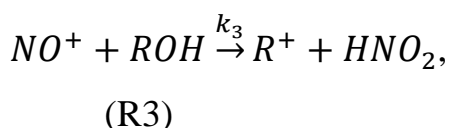

and three body association reactions,

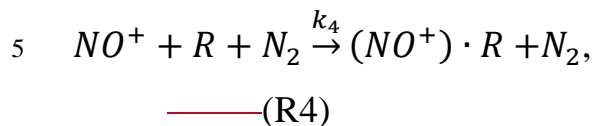

Isoprene and monoterpenes have ionization potentials lower than NO and charge transfer reactions with NO<sup>+</sup> ions (R1) occur at collision rates (Karl et al., 2012).

10 Reaction (R1) does not proceed for VOCs having ionization potentials higher than that of NO (9.26 eV) (Ebata et al., 1983).

The reaction of aldehydes with NO<sup>+</sup> typically proceeds mainly through hydride transfer (Eq. R2), whereas that of ketones is mainly through three body association (channel  
15 R4). As a result, in contrast to H<sub>3</sub>O<sup>+</sup>, NO<sup>+</sup> chemistry allows separation of isomeric ketones and aldehydes (Jordan et al., 2009). For example, in H<sub>3</sub>O<sup>+</sup> mode, MACR and MVK (C<sub>4</sub>H<sub>6</sub>O) are indistinguishable as both are detected in the protonated ion form at m/z 71.049 (C<sub>4</sub>H<sub>7</sub>O<sup>+</sup>). In NO<sup>+</sup> mode MACR yields m/z 69.033 (C<sub>4</sub>H<sub>5</sub>O<sup>+</sup>) from reaction R2 and, at a much reduced rate, m/z 100.039 (C<sub>4</sub>H<sub>6</sub>O·NO<sup>+</sup>) from reaction R4. MVK  
20 yields only m/z 100.039 from reaction R4 (Liu et al., 2013). Thus, concentrations of MVK and MACR can be independently determined (Liu et al., 2013). Acetone and MEK also proceed via three body association (R4) and yield ions at m/z 88.039 (C<sub>3</sub>H<sub>6</sub>O·NO<sup>+</sup>) and m/z 102.055 (C<sub>4</sub>H<sub>8</sub>O·NO<sup>+</sup>), respectively. Aldehydes such as acetaldehydes and benzaldehyde react at collision rate via mainly hydride ion transfer  
25 (R2). Methanol does not react with NO<sup>+</sup>.

### S.1.2 H<sub>3</sub>O<sup>+</sup> chemistry

The traditional operational mode of PTR/SRI-ToF-MS is H<sub>3</sub>O<sup>+</sup> ion chemistry, indicated as PTR-ToF-MS. We refer to the reviews on the subject for details (Blake et

al., 2009; de Gouw and Warneke, 2007). Briefly, the analyte gas mixture enters the drift tube, where molecules having a Gibbs energy of protonation (typically approximated with proton affinity) higher than water by more than 35 kJ·mol<sup>-1</sup> (Bouchoux et al., 1996) efficiently react with the H<sub>3</sub>O<sup>+</sup> primary ions by proton transfer

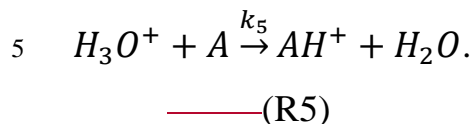

Alkenes and oVOCs, including all of those in this study, typically exhibit proton affinities high enough for detection using H<sub>3</sub>O<sup>+</sup> ion chemistry.

### S.1.3 Spectral analysis

VOC concentrations were calculated from the ion signal at each corresponding mass-to-charge ratio. To correct for count losses due to the detector dead time, an off-line procedure based on Poisson statistics was applied (Cappellin et al., 2011a; Titzmann et al., 2010). An internal mass calibration procedure was used in order to achieve a mass accuracy better than 0.001 Th (Cappellin et al., 2010). Further processing included baseline removal and peak area extraction using the procedure described by (Cappellin et al., 2011b). An optimized peak shape determined from the measured spectra was used for fitting.

The instrument response to each VOC was calibrated using standard gas cylinders (Scott Specialty Gases/Air Liquide). Gas standard 1 contained isoprene (80.0 ± 5% ppm). Gas standard 2 contained isoprene (1.07 ± 5% ppm) and MACR (1.07 ± 5% ppm). Gas standard 3 contained MEK (1.09 ± 5% ppm), MVK (1.09 ± 5% ppm), acetone (1.09 ± 5% ppm), acetaldehyde (1.09 ± 5% ppm), and methanol (1.09 ± 5% ppm). The uncertainties of the calibration gases were ± 5%. Typical concentrations used for instrumental calibration were in the range 1-70 ppbv. For isoprene concentrations used for instrumental calibration were in the range 1 ppbv - 1 ppmv.

Zero air generated as described previously was used for dilution. In the case of compounds for which gas standards were not available (benzaldehyde, 2-butanol, 3-buten-2-ol, monoterpenes), absolute concentrations were estimated with a theoretical approach (Cappellin et al., 2012) using reaction rates with the primary ion computed

at the set drift tube conditions (Su, 1994). Instrument sensitivities calculated with such method have been shown to agree with sensitivities determined experimentally within a 10% uncertainty, under certain instrumental conditions (Cappellin et al., 2012). In particular this is true when the actual identity of the compound and the fragmentation pattern are known. In some cases the chemical structure or fragmentation pattern is not known (e.g. monoterpenes) thus the expected uncertainty can increase. Moreover, some fragments can arise from multiple compounds~~In some cases the chemical structure is not known and the fragmentation patterns vary, thus the expected uncertainty increases. This is the case e.g. of monoterpenes. Moreover, some fragments~~ cannot be assigned to a unique compound (e.g.  $C_3H_5^+$ ). In  $H_3O^+$  mode the instrumental sensitivities were the following: 16.4 ncps/ppbv for isoprene, 27.1 ncps/ppbv for methacrolein, 28.7 ncps/ppbv for MVK, 28.0 ncps/ppbv for MEK, 40.0 ncps/ppbv for benzaldehyde, 21.4 ncps/ppbv for acetaldehyde, 25.8 ncps/ppbv for acetone, 13.2 ncps/ppbv for methanol, 28.5 ncps/ppbv for monoterpenes; where ncps are counts per second normalized to a primary ion signal of  $10^6$  cps. In  $NO^+$  mode the instrumental sensitivities were the following: 17.6 ncps/ppbv for isoprene, 16.4 ncps/ppbv for methacrolein, 21.0 ncps/ppbv for MVK, 26.5 ncps/ppbv for MEK, 43.7 ncps/ppbv for benzaldehyde, 13.3 ncps/ppbv for acetone, 29.9 ncps/ppbv for monoterpenes.

The spectral ion peaks employed to monitor the selected compounds are reported in Table S.1. Isoprene signal was monitored on the ion peaks 69.070 ( $C_5H_9^+$ ) for  $H_3O^+$  mode and 68.062 ( $C_5H_8^+$ ) for  $NO^+$  mode (Karl et al., 2012). At the site interferences from MBO in  $H_3O^+$  mode are negligible, given the species emitting the VOCs (Harley et al., 1998; McKinney et al., 2011). Methanol is detected at  $m/z$  33.033 in  $H_3O^+$  mode. Previous studies have established that it is free from contaminations (de Gouw et al., 2003; Warneke et al., 2003). In  $NO^+$  mode it was not possible to detect methanol as it does not react with the primary ion. MEK was monitored on the ion peaks 73.065 ( $C_4H_9O^+$ ) for  $H_3O^+$  mode and 102.055 ( $C_4H_8O \cdot NO^+$ ) for  $NO^+$  mode. Influence of butanal in  $H_3O^+$  mode might be present. However, no butanal has been found to be

emitted by red oak branches (Helmig et al., 1999). Moreover, it has not been detected in past investigations using GC separation prior to PTR-MS analysis (de Gouw et al., 2003). Acetone was monitored on the ion peaks 59.049 ( $C_3H_7O^+$ ) for  $H_3O^+$  mode and 88.039 ( $C_3H_6O \cdot NO^+$ ) for  $NO^+$  mode. Influence from propanal in  $H_3O^+$  mode, although possible, is unlikely at the site (de Gouw et al., 2003; McKinney et al., 2011; Warneke et al., 2003), as it is a compound usually present in urban areas. Acetaldehyde is detected at  $m/z$  45.033 ( $C_2H_5O^+$ ) in  $H_3O^+$  mode. Acetaldehyde is not reported in  $NO^+$  mode as the main ion 43.018 ( $C_2H_3O^+$ ) is a common fragment, therefore not a reliable signal for acetaldehyde. The ion at  $m/z$  74.024 ( $C_2H_4O \cdot NO^+$ ), from the association reaction of acetaldehyde with  $NO^+$  had a weak signal and was discarded. Benzaldehyde was monitored on the ion peaks 107.049 ( $C_7H_7O^+$ ) for  $H_3O^+$  mode and 105.033 ( $C_7H_5O^+$ ) for  $NO^+$  mode. Given the relatively distinctive molecular formula of the aromatic benzaldehyde and the very good consistency between  $H_3O^+$  and  $NO^+$  data, influences on the signal from other compounds are not expected. Monoterpenes [generally constituted by numerous compounds sharing the same  $m/z$ , (Loreto et al., 1996)] were monitored on the ion peaks 137.132 ( $C_{10}H_{17}^+$ ) for  $H_3O^+$  mode and 136.125 ( $C_{10}H_{16}^+$ ) for  $NO^+$  mode. (de Gouw and Warneke, 2007) show that monoterpene measurements are free from interferences in  $H_3O^+$  mode. No contaminants are expected in  $NO^+$  mode.

20

In  $H_3O^+$  mode MACR and MVK lead to indistinguishable isomeric ions at  $m/z$  71.049 ( $C_4H_7O^+$ ). Moreover, isoprene hydroxy hydroperoxide isomers (ISOPOOH) decompose on instrument surfaces to form MVK or MACR, which is also detected at  $m/z$  71.049 (Liu, 2015; Liu et al., 2013; Rivera-Rios et al., 2014). As discussed in Section S.1.1, in  $NO^+$  mode MACR is detected mainly at  $m/z$  69.034 ( $C_4H_5O^+$ ) with a small contribution at  $m/z$  100.039 ( $C_4H_5O \cdot NO^+$ ) whereas MVK is detected only at  $m/z$  100.039. The isoprene hydroperoxide isomers 4,3-ISOPOOH (ISOPDOOH) and 3,4-ISOPOOH (ISOPCOOH) decompose to MACR and so can also produce a signal at  $m/z$  69.034 (Liu et al., 2016; Rivera-Rios et al., 2014). ISOPCOOH concentrations are,

|

however, not relevant under atmospheric conditions and can be neglected. Therefore this peak corresponds to MACR + ISOPDOOH. Analogously, in NO<sup>+</sup> mode 1,2-ISOPOOH (ISOPBOOH) produces MVK which yields product ions at m/z 100.039 (Liu et al., 2016; Rivera-Rios et al., 2014). After correction for the contribution from  
5 MACR + ISOPDOOH, the peak at 100.039 thus corresponds to the sum MVK + ISOPBOOH.

In H<sub>3</sub>O<sup>+</sup> mode alcohols commonly undergo proton transfer reactions often followed by the elimination of a water molecule, while in NO<sup>+</sup> mode alcohols typically react via  
10 hydride ion transfer (Spanel and Smith, 1997). In the ancillary fumigation experiments the alcohols 2-butanol and 3-buten-2-ol were monitored on 73.065 (C<sub>4</sub>H<sub>9</sub>O<sup>+</sup>) and m/z 71.049 (C<sub>4</sub>H<sub>7</sub>O<sup>+</sup>), respectively, in NO<sup>+</sup> mode. In H<sub>3</sub>O<sup>+</sup> mode they were monitored on m/z 57.070 (C<sub>4</sub>H<sub>9</sub><sup>+</sup>) and 55.054 (C<sub>4</sub>H<sub>7</sub><sup>+</sup>), respectively (Spanel and Smith, 1997).

## 15 **References**

- Amelynck, C., Schoon, N., Kuppens, T., Bultinck, P. and Arijs, E.: A selected ion flow tube study of the reactions of H<sub>3</sub>O<sup>+</sup>, NO<sup>+</sup> and O<sub>2</sub><sup>+</sup> with some oxygenated biogenic volatile organic compounds, *Int. J. Mass Spectrom.*, 247(1–3), 1–9, doi:10.1016/j.ijms.2005.08.010, 2005.
- 20 Blake, R., Monks, P. and Ellis, A.: Proton-Transfer Reaction Mass Spectrometry, *Chem. Rev.*, 109(3), 861–896, doi:10.1021/cr800364q, 2009.
- Bouchoux, G., Salpin, J. Y. and Leblanc, D.: A relationship between the kinetics and thermochemistry of proton transfer reactions in the gas phase, *Int. J. MASS Spectrom. ION Process.*, 153(1), 37–48, 1996.
- Cappellin, L., Biasioli, F., Fabris, A., Schuhfried, E., Soukoulis, C., Mark, T. and Gasperi, F.: Improved mass accuracy in PTR-TOF-MS: Another step towards better compound identification in PTR-MS, *Int. J. Mass Spectrom.*, 290(1), 60–63, doi:10.1016/j.ijms.2009.11.007, 2010.
- 25 Cappellin, L., Biasioli, F., Schuhfried, E., Soukoulis, C., Märk, T. D. and Gasperi, F.: Extending the dynamic range of proton transfer reaction time-of-flight mass spectrometers by a novel dead time correction, *Rapid Commun. Mass Spectrom. RCM*, 25(1), 179–183, doi:10.1002/rcm.4819, 2011a.
- Cappellin, L., Biasioli, F., Granitto, P. M., Schuhfried, E., Soukoulis, C., Costa, F., Märk, T. D. and Gasperi, F.: On data analysis in PTR-TOF-MS: From raw spectra to data mining, *Sens. Actuators B Chem.*, 155(1), 183–190, doi:10.1016/j.snb.2010.11.044, 2011b.
- 30 Cappellin, L., Karl, T., Probst, M., Ismailova, O., Winkler, P. M., Soukoulis, C., Aprea, E., Märk, T. D., Gasperi, F. and Biasioli, F.: On Quantitative Determination of Volatile Organic Compound Concentrations Using Proton Transfer Reaction Time-of-Flight Mass Spectrometry, *Env. Sci Technol*, 46(4), 2283–2290, doi:10.1021/es203985t, 2012.
- 35 Ebata, T., Anezaki, Y., Fujii, M., Mikami, N. and Ito, M.: High Rydberg states of nitric oxide studied by two-color multiphoton spectroscopy, *J. Phys. Chem.*, 87(24), 4773–4776, doi:10.1021/j150642a001, 1983.

- de Gouw, J. and Warneke, C.: Measurements of volatile organic compounds in the earth's atmosphere using proton-transfer-reaction mass spectrometry, *Mass Spectrom. Rev.*, 26(2), 223–257, doi:10.1002/mas.20119, 2007.
- de Gouw, J., Warneke, C., Karl, T., Eerdekens, G., van der Veen, C. and Fall, R.: Sensitivity and specificity of atmospheric trace gas detection by proton-transfer-reaction mass spectrometry, *Int. J. Mass Spectrom.*, 223(1–3), 365–382, 2003.
- 5 Harley, P., Fridd-Stroud, V., Greenberg, J., Guenther, A. and Vasconcellos, P.: Emission of 2-methyl-3-buten-2-ol by pines: A potentially large natural source of reactive carbon to the atmosphere, *J. Geophys. Res. Atmospheres*, 103(D19), 25479–25486, doi:10.1029/98JD00820, 1998.
- Helmig, D., Klinger, L. F., Guenther, A., Vierling, L., Geron, C. and Zimmerman, P.: Biogenic volatile organic compound emissions (BVOCs) I. Identifications from three continental sites in the U.S., *Chemosphere*, 38(9), 2163–2187, doi:10.1016/S0045-6535(98)00425-1, 1999.
- 10 Jordan, A., Haidacher, S., Hanel, G., Hartungen, E., Herbig, J., Märk, L., Schottkowsky, R., Seehauser, H., Sulzer, P. and Märk, T. D.: An online ultra-high sensitivity Proton-transfer-reaction mass-spectrometer combined with switchable reagent ion capability (PTR + SRI – MS), *Int. J. Mass Spectrom.*, 286(1), 32–38, doi:10.1016/j.ijms.2009.06.006, 2009.
- 15 Karl, T., Hansel, A., Cappellin, L., Kaser, L., Herdinger-Blatt, I. and Jud, W.: Selective measurements of isoprene and 2-methyl-3-buten-2-ol based on NO<sup>+</sup> ionization mass spectrometry, *Atmos Chem Phys*, 12(24), 11877–11884, doi:10.5194/acp-12-11877-2012, 2012.
- Knighton, W. B., Fortner, E. C., Herndon, S. C., Wood, E. C. and Miake-Lye, R. C.: Adaptation of a proton transfer reaction mass spectrometer instrument to employ NO<sup>+</sup> as reagent ion for the detection of 1,3-butadiene in the ambient atmosphere, *Rapid Commun. Mass Spectrom. RCM*, 23(20), 3301–3308, doi:10.1002/rcm.4249, 2009.
- 20 Liu, Y.: Isoprene Photooxidation via the Hydroperoxyl Pathway, Doctoral dissertation, Harvard University, Graduate School of Arts & Sciences, 23 January. [online] Available from: <https://dash.harvard.edu/handle/1/14226050> (Accessed 29 January 2016), 2015.
- Liu, Y., Brito, J., Dorris, M. R., Rivera-Rios, J. C., Seco, R., Bates, K. H., Artaxo, P., Duvoisin, S., Keutsch, F. N., Kim, S., Goldstein, A. H., Guenther, A. B., Manzi, A. O., Souza, R. A. F., Springston, S. R., Watson, T. B., McKinney, K. A. and Martin, S. T.: Isoprene photochemistry over the Amazon rainforest, *Proc. Natl. Acad. Sci.*, 113(22), 6125–6130, doi:10.1073/pnas.1524136113, 2016.
- 25 Liu, Y. J., Herdinger-Blatt, I., McKinney, K. A. and Martin, S. T.: Production of methyl vinyl ketone and methacrolein via the hydroperoxyl pathway of isoprene oxidation, *Atmos Chem Phys*, 13(11), 5715–5730, doi:10.5194/acp-13-5715-2013, 2013.
- 30 Loreto, F., Ciccioli, P., Cecinato, A., Brancaleoni, E., Frattoni, M., Fabozzi, C. and Tricoli, D.: Evidence of the Photosynthetic Origin of Monoterpenes Emitted by *Quercus ilex* L. Leaves by <sup>13</sup>C Labeling., *Plant Physiol.*, 110(4), 1317–1322, 1996.
- McKinney, K. A., Lee, B. H., Vasta, A., Pho, T. V. and Munger, J. W.: Emissions of isoprenoids and oxygenated biogenic volatile organic compounds from a New England mixed forest, *Atmos Chem Phys*, 11(10), 4807–4831, doi:10.5194/acp-11-4807-2011, 2011.
- 35 Rivera-Rios, J. C., Nguyen, T. B., Crounse, J. D., Jud, W., St. Clair, J. M., Mikoviny, T., Gilman, J. B., Lerner, B. M., Kaiser, J. B., de Gouw, J., Wisthaler, A., Hansel, A., Wennberg, P. O., Seinfeld, J. H. and Keutsch, F. N.: Conversion of hydroperoxides to carbonyls in field and laboratory instrumentation: Observational bias in diagnosing pristine versus anthropogenically controlled atmospheric chemistry, *Geophys. Res. Lett.*, 41(23), 2014GL061919, doi:10.1002/2014GL061919, 2014.
- 40 Spänel, P. and Smith, D.: SIFT studies of the reactions of H<sub>3</sub>O<sup>+</sup>, NO<sup>+</sup> and O<sub>2</sub><sup>+</sup> with a series of alcohols, *Int. J. Mass Spectrom. Ion Process.*, 167, 375–388, doi:10.1016/S0168-1176(97)00085-2, 1997.
- Spänel, P. and Smith, D.: Selected ion flow tube studies of the reactions of H<sub>3</sub>O<sup>+</sup>, NO<sup>+</sup>, and O<sub>2</sub><sup>(+)</sup> with several aromatic and aliphatic hydrocarbons, *Int. J. Mass Spectrom.*, 181, 1–10, 1998.
- 45 Su, T.: Parametrization of kinetic energy dependences of ion–polar molecule collision rate constants by trajectory calculations, *J. Chem. Phys.*, 100(6), 4703, doi:10.1063/1.466255, 1994.



Titzmann, T., Graus, M., Müller, M., Hansel, A. and Ostermann, A.: Improved peak analysis of signals based on counting systems: Illustrated for proton-transfer-reaction time-of-flight mass spectrometry, *Int. J. Mass Spectrom.*, 295(1–2), 72–77, doi:10.1016/j.ijms.2010.07.009, 2010.

5 Warneke, C., de Gouw, J. A., Kuster, W. C., Goldan, P. D. and Fall, R.: Validation of Atmospheric VOC Measurements by Proton-Transfer- Reaction Mass Spectrometry Using a Gas-Chromatographic Preseparation Method, *Environ. Sci. Technol.*, 37(11), 2494–2501, doi:10.1021/es026266i, 2003.

## Supplementary tables

10 **Table S.1.** Ions employed to monitor the selected volatile compounds/species by means of SRI-ToF-MS in either  $\text{H}_3\text{O}^+$  or  $\text{NO}^+$  mode.

|                     | <u><math>\text{H}_3\text{O}^+</math> mode</u>      | <u><math>\text{NO}^+</math> mode</u>                             |
|---------------------|----------------------------------------------------|------------------------------------------------------------------|
| <u>Isoprene</u>     | <u><math>\text{C}_5\text{H}_9^+</math></u>         | <u><math>\text{C}_5\text{H}_8^+</math></u>                       |
| <u>MACR</u>         | <u><math>\text{C}_4\text{H}_7\text{O}^+</math></u> | <u><math>\text{C}_4\text{H}_5\text{O}^+</math></u>               |
| <u>MVK</u>          | <u><math>\text{C}_4\text{H}_7\text{O}^+</math></u> | <u><math>\text{C}_4\text{H}_5\text{O}\cdot\text{NO}^+</math></u> |
| <u>MEK</u>          | <u><math>\text{C}_4\text{H}_9\text{O}^+</math></u> | <u><math>\text{C}_4\text{H}_8\text{O}\cdot\text{NO}^+</math></u> |
| <u>Benzaldehyde</u> | <u><math>\text{C}_7\text{H}_7\text{O}^+</math></u> | <u><math>\text{C}_7\text{H}_5\text{O}^+</math></u>               |
| <u>Acetaldehyde</u> | <u><math>\text{C}_2\text{H}_5\text{O}^+</math></u> | -                                                                |
| <u>Acetone</u>      | <u><math>\text{C}_3\text{H}_7\text{O}^+</math></u> | <u><math>\text{C}_3\text{H}_6\text{O}\cdot\text{NO}^+</math></u> |
| <u>Methanol</u>     | <u><math>\text{CH}_5\text{O}^+</math></u>          | -                                                                |
| <u>Monoterpenes</u> | <u><math>\text{C}_{10}\text{H}_{17}^+</math></u>   | <u><math>\text{C}_{10}\text{H}_{16}^+</math></u>                 |

## Supplementary figure captions

15 **Figure S.1.** Picture of a (top of the canopy) branch enclosure employed in the experiments.

20

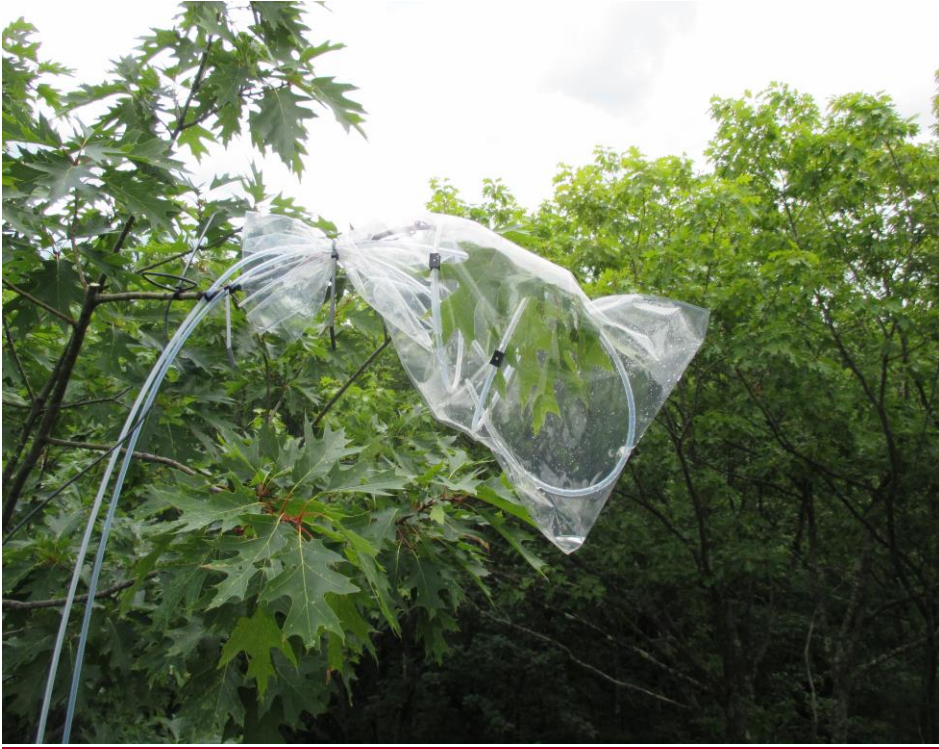

**Fig S.1**
